# Supplementary material
Source: PubMed Central journal article supplement (PMC3217325)
Supplement: tables.pdf [file tables.pdf]

1 Table S1: Up-regulated genes in all time points post MI.

| Uniquely up-regulated 2 days post-MI | Uniquely up-regulated 2 weeks post-MI | Uniquely up-regulated 2 months post-MI | Commonly up-regulated in 2 days and 2 weeks | Commonly up-regulated in 2 days and 2 months | Commonly up-regulated in 2 weeks and 2 months | Commonly up-regulated in all time points |
|--------------------------------------|---------------------------------------|----------------------------------------|---------------------------------------------|----------------------------------------------|-----------------------------------------------|------------------------------------------|
| A4galt                               | Acp2                                  | Abra                                   | Abi1                                        | Akap2                                        | Adamts3                                       | Adamts1                                  |
| Aacs                                 | Adamts10                              | Agfg2                                  | Abi2                                        | Anxa7                                        | Adamts12                                      | Adamts9                                  |
| Aars                                 | Adamts17                              | Aqp8                                   | Actg1                                       | Apold1                                       | Adecy7                                        | Anxa1                                    |
| Aatf                                 | Adamts2                               | Armex4                                 | Adam10                                      | Arid5a                                       | Alpk1                                         | Anxa3                                    |
| Abca7                                | Adap2                                 | Arrdc3                                 | Adamts12                                    | Atf3                                         | Ankrd1                                        | Arfgap3                                  |
| Abcc1                                | Adecy3                                | Atp8a2                                 | Aff4                                        | B4galt5                                      | Armex3                                        | Atp6v1a                                  |
| Abcc3                                | Akt3                                  | Atpif1                                 | Aldh18a1                                    | Bcl2l1                                       | Atp6v0a4                                      | Atp8b1                                   |
| Abce1                                | Ammecr11                              | Bcl2                                   | Ano6                                        | Btg2                                         | Cmklr1                                        | Axl                                      |
| Abhd2                                | Angpt1                                | Camkk2                                 | Anxa2                                       | Ccnd1                                        | Col15a1                                       | Azin1                                    |
| Abl2                                 | Anln                                  | Cbfb                                   | Anxa4                                       | Ccnd2                                        | Col6a1                                        | Carhsp1                                  |
| Acaca                                | Aoah                                  | Ccl12                                  | Anxa5                                       | Cdc42se1                                     | Col8a1                                        | Cd44                                     |
| Acap2                                | Apobec3                               | Cd302                                  | Ap3s1                                       | Cdkn1a                                       | Comp                                          | Col4a1                                   |
| Acbd3                                | Apoe                                  | Cebpd                                  | Apaf1                                       | Cdr2                                         | Creb3l2                                       | Col4a2                                   |
| Acer2                                | App                                   | Ces5                                   | Arf6                                        | Ch25h                                        | Dio2                                          | Ctgf                                     |
| Acin1                                | Arf4                                  | Colq                                   | Arfip1                                      | Cks1b                                        | Dusp3                                         | Cttmbp2nl                                |
| Acly                                 | Arhgap15                              | Crispld2                               | Arhgap11a                                   | Cldn5                                        | Dynll1                                        | Cyb561                                   |
| Acot10                               | Arhgap22                              | Cx3cl1                                 | Arhgap25                                    | Clip2                                        | Efhd1                                         | Cyth3                                    |
| Acot4                                | Arhgef12                              | Cycl1                                  | Arpc1b                                      | Cpeb1                                        | Etv1                                          | Dbn1                                     |
| Acot9                                | Armex2                                | Dagla                                  | Atl3                                        | Crlf1                                        | Etv5                                          | Debl2                                    |
| Acp5                                 | Arsb                                  | Ddah2                                  | Atp1b3                                      | Csrnp1                                       | Fam114a1                                      | Dchs1                                    |
| Acr                                  | Asah1                                 | Dennd3                                 | Atp6v1b2                                    | Ddit4                                        | Fam46a                                        | Dusp6                                    |
| Acsbg1                               | Asah2                                 | Dnml                                   | Atp7a                                       | Dusp27                                       | Frem2                                         | Dync1li1                                 |
| Acsl4                                | Aspn                                  | Dok7                                   | Atp8b2                                      | Egr3                                         | Frzb                                          | Ednrb                                    |
| Acsl5                                | Atad2                                 | Edn3                                   | B4galt1                                     | Ehd4                                         | Gatsl3                                        | Efhd2                                    |
| Actb                                 | Atoh8                                 | Ehbp111                                | Bak1                                        | Eif1a                                        | Gramd1a                                       | Egr2                                     |
| Actn1                                | Atxn711                               | Erf                                    | Baz1a                                       | Enah                                         | Hcn1                                          | Eml4                                     |
| Actn4                                | B3galt1                               | F2r                                    | Bmp1                                        | Enc1                                         | Hmcn1                                         | Emp1                                     |
| Actr2                                | Bace1                                 | F2rl1                                  | Bmp2k                                       | Ereg                                         | Ift122                                        | Esam                                     |
| Actr3                                | Bace2                                 | Fads1                                  | Calm2                                       | Errf1                                        | Igsf1                                         | Fam129b                                  |
| Ada                                  | Bgn                                   | Fam115a                                | Cand1                                       | Etv6                                         | I118bp                                        | Fam78b                                   |
| Adam12                               | Bmp4                                  | Fzd1                                   | Cap1                                        | Fem1b                                        | Islr                                          | Fbln2                                    |
| Adam15                               | Bub1                                  | Gm428                                  | Capg                                        | Fgf2                                         | Itga6                                         | Fbn1                                     |
| Adam8                                | C1qa                                  | Hdh3                                   | Capza1                                      | Fkbp5                                        | Ith5                                          | Fstl1                                    |
| Adam9                                | C1qb                                  | Heph11                                 | Cask                                        | Flnc                                         | Kcna4                                         | Gfpt2                                    |
| Adamts4                              | C1qc                                  | Hn1                                    | Ccnd3                                       | Fosl2                                        | Lipa                                          | Gpr153                                   |
| Adamts6                              | C1qtnf3                               | Ier5                                   | Ccnyl1                                      | Foxc2                                        | Lox11                                         | Hif1a                                    |
| Adat2                                | Calcr1                                | Igfbp6                                 | Cd33                                        | Gadd45g                                      | Lsm3                                          | Inpp5d                                   |
| Adc                                  | Casc5                                 | I117rd                                 | Cd38                                        | Gdf15                                        | Meox1                                         | Itga5                                    |
| Adck4                                | Casp4                                 | Itm2c                                  | Cd53                                        | Gmppb                                        | Mmp2                                          | Layn                                     |
| Adeyap1r1                            | Casp7                                 | Jdp2                                   | Cd9                                         | Gp49a                                        | Mrc2                                          | Lox12                                    |
| Adfp                                 | Cav2                                  | Kcna5                                  | Cd93                                        | Gpr149                                       | Mtap1a                                        | Lpar1                                    |
| Adm                                  | Ccdc88a                               | Klf2                                   | Cdc20                                       | Grk5                                         | Myh7                                          | Lrrc8a                                   |
| Adnp2                                | Ccl5                                  | Klhdc8a                                | Cdh5                                        | Has1                                         | Nbl1                                          | Ltbp2                                    |
| Adora3                               | Ccna2                                 | Lbp                                    | Cep170                                      | Hbegf                                        | Ndr4                                          | Map3k8                                   |
| Adpgk                                | Ccnb2                                 | Lin54                                  | Chst1                                       | Hectd2                                       | Nfkb1                                         | Med10                                    |
| Adrb2                                | Ccnf                                  | Lrrc51                                 | Clic1                                       | Hhip11                                       | Nostrin                                       | Mex3c                                    |
| Adss                                 | Cerl1                                 | Maml3                                  | Cnn3                                        | Hsd17b12                                     | Nppa                                          | Mfap5                                    |
| Aebp1                                | Cd109                                 | Mcm2                                   | Cnot6                                       | Hspa1a                                       | Pamr1                                         | Mgat4a                                   |
| Aff1                                 | Cd248                                 | Myl1                                   | Col12a1                                     | Icam1                                        | Pik3r6                                        | Mllt11                                   |
| Agpat4                               | Cd34                                  | Myom2                                  | Col6a3                                      | Ier3                                         | Plekhg2                                       | Ms4a6b                                   |
| Ahctf1                               | Cd55                                  | Neb                                    | Coro1c                                      | Igfbp3                                       | Postn                                         | Ms4a6d                                   |
| Ahi1                                 | Cd72                                  | Nod2                                   | Cpne8                                       | Ints2                                        | Ppp1r10                                       | Msn                                      |
| Ahnak                                | Cdc14a                                | Nr4a1                                  | Csnk1g3                                     | Irak2                                        | Prkar1a                                       | Mtap1b                                   |
| Aida                                 | Cdc2a                                 | Nr4a3                                  | Ctla2a                                      | Junb                                         | Ptgfrn                                        | Necap2                                   |
| Aim2                                 | Cdca3                                 | Nubp2                                  | Cul4b                                       | Kctd11                                       | Rhbdfl                                        | Nedd9                                    |
| Ak311                                | Cenpi                                 | Olfir809                               | Cxcr4                                       | Litaf                                        | Rnd3                                          | Nfkbiz                                   |
| Akap12                               | Cep192                                | Otud1                                  | Dap                                         | Lmcd1                                        | Rybp                                          | Nppb                                     |
| Akirin1                              | Cep55                                 | P2ry2                                  | Ddx58                                       | Lmna                                         | Sae1                                          | Nt5e                                     |
| Akna                                 | Cflar                                 | Pbxip1                                 | Dennd4a                                     | Lpin3                                        | Samd5                                         | Numbl                                    |
| Akr1b8                               | Cib1                                  | Pcolce2                                | Dger8                                       | Lrp8                                         | Sardh                                         | Oaf                                      |
| Alas2                                | Ckap2                                 | Pdgfc                                  | Dhx33                                       | Lrrc8b                                       | Shisa4                                        | Osmr                                     |
| Alcam                                | Ckap2l                                | Pil6                                   | Dock10                                      | Maff                                         | Socs2                                         | Pafah1b2                                 |
| Aldh1a2                              | Clec11a                               | Pla1a                                  | Dock7                                       | Mafk                                         | Sox9                                          | Panx1                                    |
| Aldh3b1                              | Clec12a                               | Ppml1e                                 | Dpp3                                        | Map3k6                                       | Sptlc2                                        | Pdlim1                                   |

|          |          |            |          |           |       |          |
|----------|----------|------------|----------|-----------|-------|----------|
| Aldoc    | Clec2d   | Prkca      | Dpysl3   | Mapk1ip11 | Srpx2 | Pdlim5   |
| Alg5     | Cmtm6    | Psmb10     | Dsel     | Masp1     | Svepl | Phlda1   |
| Alg9     | Cnot6l   | Ptger4     | Edem1    | Mobkl2a   | Tnmd  | Pmp22    |
| Alkbh1   | Col11a1  | Rab18      | Eif2ak4  | Mtap6     | Ube2c | Ppap2b   |
| Alkbh2   | Col14a1  | Rasd1      | Endod1   | Myc       | Ubt2  | Prmt2    |
| Alox15   | Col4a3   | Rcan1      | Entpd1   | Nek6      | Wwtr1 | Ptgis    |
| Alox5ap  | Col4a4   | Scx        | Fam102b  | Nes       |       | Ptpn1    |
| Aloxe3   | Col5a1   | Serpinf1   | Fam54a   | Nfkbia    |       | Ptpn12   |
| Ambral   | Col5a2   | Shisa3     | Far1     | Nme1      |       | Ptpn9    |
| Amical   | Col6a2   | Sik1       | Fcer1g   | Nos3      |       | Rab31    |
| Ammecr1  | Colec12  | Smad3      | Fcgr3    | Notch1    |       | Rasa3    |
| Amot     | Commd7   | Snap91     | Fgfr1    | Nuak2     |       | Rin3     |
| Amotl1   | Cpd      | Snord58b   | Flnb     | Pdlim7    |       | Rnf169   |
| Ampd2    | Cspp1    | Spry1      | Fmnl3    | Per1      |       | Rps4y2   |
| Ampd3    | Csprs    | St6galnac4 | Fn1      | Pfkip     |       | Sdc4     |
| Angpt2   | Ctdspl2  | Tas2r117   | Fndc3a   | Pgam1     |       | Sec24d   |
| Angptl4  | Ctsk     | Tbc1d10a   | Fndc3b   | Pgm1      |       | Sema3f   |
| Ankib1   | Cx3cr1   | Tet2       | Ftl2     | Plat      |       | Serpine1 |
| Ankrd10  | Cxcl16   | Thbs4      | G2e3     | Plaur     |       | Sgms2    |
| Ankrd13a | Cybb     | Tnfaip2    | Gab2     | Plk3      |       | Skil     |
| Ankrd2   | Cyp3a44  | Tomm5      | Gas2l3   | Plscr1    |       | Slc38a2  |
| Ankrd27  | Ddah1    | Tpst2      | Gas5     | Ppap2c    |       | Slc39a6  |
| Ankrd28  | Ddr2     | Tsg101     | Gdap2    | Ppmlf     |       | Slc41a2  |
| Ankrd37  | Diap2    | Tspan17    | Gpr124   | Pprc1     |       | Slc7a6   |
| Ankrd52  | Dlg2     | Tubb2c     | Gprc5b   | Prr5      |       | Smad1    |
| Anp32b   | Dlgap5   | Txndc12    | H2afx    | Ptgs2     |       | Spats2   |
| Ap2b1    | Dock1    | Unc119b    | Hiatl1   | Ptpn2     |       | Spred1   |
| Apbb1ip  | Dock6    | Vmn2r50    | Hip1     | Pvt1      |       | Synpo    |
| Apex1    | Dpysl2   | Vsig2      | Hmox1    | Qsox1     |       | Tgfb1    |
| Apln     | Dtx3l    | Wdr34      | Hn1l     | Rangap1   |       | Tgm2     |
| Apob48r  | Ect2     | Xrcc2      | Hnrnpf   | Rhoc      |       | Thbs1    |
| Apoc2    | Eda2r    | Zfp640     | Hpcal1   | Rlf       |       | Timp1    |
| Aprt     | Ehd2     |            | Hspa8    | Rpl3      |       | Tlr4     |
| Arc      | Eif2ak2  |            | Ifi204   | Rrp12     |       | Tmem173  |
| Arf1     | Elmo1    |            | Ifitm2   | Samd4b    |       | Tmem2    |
| Arf2     | Enpp1    |            | Ifitm3   | Sbno2     |       | Trim47   |
| Arf3     | Epb4.1l2 |            | Il1rl2   | Scd4      |       | Tshz3    |
| Arfgap1  | Eps15    |            | Il6ra    | Sele      |       | Tspo     |
| Arg1     | Erg      |            | Iqgap1   | Sema4c    |       | Uchl1    |
| Arg2     | Espl1    |            | Irf7     | Sema6b    |       | Ugdh     |
| Arhgap1  | Ets1     |            | Itgav    | Sema7a    |       | Upp1     |
| Arhgap27 | Ext1     |            | Itgb1    | Sfn       |       | Vcan     |
| Arhgap30 | Eya4     |            | Itpril2  | Sgk1      |       | Wsb1     |
| Arhgap9  | Ezh2     |            | Kctd10   | Sh2d3c    |       | X99384   |
| Arhgdia  | Fabp5    |            | Kdelr3   | Sh3gl1    |       | Xirp1    |
| Arhgef1  | Fam129a  |            | Kdsr     | Slc10a6   |       | Zswim6   |
| Arhgef5  | Fam38b2  |            | Kif22    | Slc16a6   |       |          |
| Arid3a   | Fam70b   |            | Kit      | Slc20a1   |       |          |
| Arih1    | Fat1     |            | Krt18    | Slc25a25  |       |          |
| Arih2    | Fbln5    |            | Lepre1   | Smox      |       |          |
| Arl11    | Fbn2     |            | Lgals3   | Sorbs3    |       |          |
| Arl8a    | Fbx17    |            | Lgals3bp | Spry4     |       |          |
| Armc7    | Fcrls    |            | Lgals9   | Spty2d1   |       |          |
| Arpc2    | Fhl5     |            | Lilrb4   | Srm       |       |          |
| Arpc3    | Fli1     |            | Lox13    | St3gal1   |       |          |
| Arpc4    | Flrt2    |            | Lpin2    | Stc1      |       |          |
| Arpc5    | Fndc1    |            | Lpp      | Syt12     |       |          |
| Arrb1    | Frat1    |            | Lxn      | Tax1bp3   |       |          |
| Arrb2    | Frem1    |            | Lyst     | Tgfb1     |       |          |
| Arrdc4   | Frm4b    |            | Man1a    | Tgfb2     |       |          |
| Arsg     | Ftl1     |            | Man2a1   | Tle3      |       |          |
| Arv1     | Fuca1    |            | Map4k3   | Tmem62    |       |          |
| Ascc2    | Fut11    |            | Mapre1   | Tmem97    |       |          |
| Ascc3    | Fxyd6    |            | Marcks11 | Tnfrsf12a |       |          |
| Asns     | Fzd8     |            | Mcam     | Tnfrsf1a  |       |          |
| Asprv1   | Gabpb1   |            | Mcm6     | Tnip1     |       |          |
| Aspscr1  | Ggta1    |            | Med15    | Trib1     |       |          |
| Ass1     | Gja5     |            | Mest     | Trim16    |       |          |
| Atf4     | Glecc1   |            | Mgat2    | Tspan9    |       |          |

|           |            |  |           |         |  |  |
|-----------|------------|--|-----------|---------|--|--|
| Atic      | Glt8d4     |  | Mib1      | Ttl12   |  |  |
| Atn1      | Gmn        |  | Mkl1      | Ttpal   |  |  |
| Atoh1     | Gnas       |  | Mmp14     | Tuba1a  |  |  |
| Atp13a3   | Gnb4       |  | Mobk12c   | Tuba1b  |  |  |
| Atp1a3    | Got2       |  | Morc3     | Tubb2a  |  |  |
| Atp6v1h   | Gpc6       |  | Ms4a6c    | Tubb2b  |  |  |
| Atp8b4    | Grb10      |  | Mtmr11    | Tubb6   |  |  |
| Atxn10    | Gria3      |  | Mtmr2     | Uap1    |  |  |
| Atxn11    | Grn        |  | Mx1       | Ubt1    |  |  |
| Atxn21    | Guey1b3    |  | Myh10     | Uck2    |  |  |
| Atxn712   | Gulp1      |  | Myh9      | Vat1    |  |  |
| Atxn713   | H2-D1      |  | Myo1d     | Wt1     |  |  |
| B3gnt3    | H2-K1      |  | Myo5a     | Zc3h12a |  |  |
| B3gnt7    | H2-Q6      |  | Myof      | Zfp568  |  |  |
| B4galnt1  | H2-Q7      |  | Ncam1     | Zyx     |  |  |
| Baiap2    | H2-Q8      |  | Nckap11   |         |  |  |
| Baspl     | Herc5      |  | Nid2      |         |  |  |
| Bat1a     | Hexb       |  | Nipsnap3a |         |  |  |
| Bax       | Hiat1      |  | Nmt2      |         |  |  |
| Bcar1     | Hist1h2af  |  | Nrg1      |         |  |  |
| Bcat1     | Hist1h2an  |  | Nuch2     |         |  |  |
| Bcl10     | Hist1h2ao  |  | Nup155    |         |  |  |
| Bcl2a1a   | Hist1h2bb  |  | Nus1      |         |  |  |
| Bcl2a1b   | Hist1h2bc  |  | Pabpc1    |         |  |  |
| Bcl2a1c   | Hist1h2bg  |  | Papd4     |         |  |  |
| Bcl2a1d   | Hist1h2bm  |  | Parva     |         |  |  |
| Bcr       | Hist1h3a   |  | Pctk2     |         |  |  |
| Bdkrb2    | Hist1h3f   |  | Pdk3      |         |  |  |
| Bet11     | Hist1h3g   |  | Picalm    |         |  |  |
| Bhlhe40   | Hist1h4b   |  | Pigm      |         |  |  |
| Bin1      | Hist2h2aa1 |  | Plk2      |         |  |  |
| Bin2      | Hist2h3b   |  | Plod2     |         |  |  |
| Bin3      | Hist2h3c1  |  | Plp2      |         |  |  |
| Birc1f    | Hmgn3      |  | Pls3      |         |  |  |
| Birc3     | Iffo1      |  | Pnp2      |         |  |  |
| Blk       | Ifi203     |  | Ppia      |         |  |  |
| Blm       | Ifi44      |  | Praf2     |         |  |  |
| Bmf       | Ifih1      |  | Prelid1   |         |  |  |
| Bmp2      | Ifit1      |  | Prkcdbp   |         |  |  |
| Bnip3     | Ifit2      |  | Prmt6     |         |  |  |
| Bnip3l    | Ifngr1     |  | Pros1     |         |  |  |
| Bok       | Igfbp7     |  | Ptprf     |         |  |  |
| Bop1      | Igsf10     |  | Ptprj     |         |  |  |
| Bpgm      | Il10ra     |  | Pxdn      |         |  |  |
| Brap      | Il2rg      |  | Rab27a    |         |  |  |
| Brd2      | Il34       |  | Rab5c     |         |  |  |
| Brp16     | Iqgap3     |  | Rai14     |         |  |  |
| Brpf1     | Itga1      |  | Rap1b     |         |  |  |
| Bsn       | Itgb5      |  | Rbm3      |         |  |  |
| Bst1      | Itgb11     |  | Rbm7      |         |  |  |
| Btbd10    | Itm2a      |  | Rhog      |         |  |  |
| Btbd12    | Itpr1      |  | Rhoj      |         |  |  |
| Btg1      | Itpr2      |  | Ripk1     |         |  |  |
| Btg3      | Jag1       |  | Rnf115    |         |  |  |
| Bub1b     | Kcne1      |  | Rnu73b    |         |  |  |
| Bxdc1     | Kdelc2     |  | Rod1      |         |  |  |
| Bxdc2     | Kif11      |  | Rpl23a    |         |  |  |
| Bysl      | Kif20a     |  | Rsu1      |         |  |  |
| Bzw1      | Kif23      |  | S100a11   |         |  |  |
| Clqmf6    | Kif26b     |  | Sdc3      |         |  |  |
| C5ar1     | Kif4       |  | Sec61a1   |         |  |  |
| Cacna1d   | Klhdc8b    |  | Sec61g    |         |  |  |
| Cad       | Klhl26     |  | Sema6d    |         |  |  |
| Cald1     | Klra10     |  | Serp1     |         |  |  |
| Calm1     | Lama2      |  | Sf3b1     |         |  |  |
| Camsap111 | Lama4      |  | Sfxn3     |         |  |  |
| Capn2     | Lamb1-1    |  | Sh3bp2    |         |  |  |
| Car13     | Lamc1      |  | Slc1a5    |         |  |  |
| Car9      | Leprel2    |  | Slc25a24  |         |  |  |

|            |          |  |           |  |  |  |
|------------|----------|--|-----------|--|--|--|
| Cars       | Lhfp     |  | Slc39a1   |  |  |  |
| Casp3      | Lima1    |  | Slc6a6    |  |  |  |
| Casp8      | Lrrc16a  |  | Slfn2     |  |  |  |
| Cast       | Lrrk1    |  | Smoc1     |  |  |  |
| Cbl        | Lsp1     |  | Smpx      |  |  |  |
| Cblb       | Luzp1    |  | Snord82   |  |  |  |
| Ccbp2      | Ly86     |  | Snx4      |  |  |  |
| Ccdc109b   | Lyz2     |  | Soat1     |  |  |  |
| Ccdc134    | Maml2    |  | Spata6    |  |  |  |
| Ccdc50     | Map3k3   |  | Spire1    |  |  |  |
| Ccdc6      | Marcks   |  | Spna2     |  |  |  |
| Ccdc86     | Mdfic    |  | Tacc3     |  |  |  |
| Cchcr1     | Melk     |  | Tagln2    |  |  |  |
| Ccl17      | Mfap2    |  | Tcf12     |  |  |  |
| Ccl3       | Mier1    |  | Tdrd7     |  |  |  |
| Ccl6       | Mki67    |  | Tfdp1     |  |  |  |
| Ccl9       | Mllt3    |  | Tgfbr2    |  |  |  |
| Ccn1       | Mpz1     |  | Tgif1     |  |  |  |
| Ccr1       | Ms4a7    |  | Tifab     |  |  |  |
| Cct2       | Mttr6    |  | Tiparp    |  |  |  |
| Cct3       | Mxd4     |  | Tirap     |  |  |  |
| Cct4       | Mxi1     |  | Tmem45a   |  |  |  |
| Cct6a      | Mxra7    |  | Tmod3     |  |  |  |
| Cct8       | Mybl1    |  | Tmsb10    |  |  |  |
| Cd14       | Myl12b   |  | Tmsb4x    |  |  |  |
| Cd177      | Myo1e    |  | Tns3      |  |  |  |
| Cd244      | Myo9a    |  | Tor1aip2  |  |  |  |
| Cd24a      | Naalad2  |  | Tpm3      |  |  |  |
| Cd300a     | Naip5    |  | Tpm4      |  |  |  |
| Cd300lf    | Nav3     |  | Trim30    |  |  |  |
| Cd37       | Nbea     |  | Trp53inp1 |  |  |  |
| Cd52       | Ncaph    |  | Tspan14   |  |  |  |
| Cd63       | Nelf     |  | Tspan4    |  |  |  |
| Cd84       | Nid1     |  | Ttyh2     |  |  |  |
| Cd97       | Nin      |  | Tubb5     |  |  |  |
| Cda        | Nr2c2    |  | Twf1      |  |  |  |
| Cdc16      | Nrp2     |  | Ube2i     |  |  |  |
| Cdc42      | Nuf2     |  | Vash1     |  |  |  |
| Cdc42bbp   | Nupr1    |  | Vim       |  |  |  |
| Cdca4      | Nusap1   |  | Wdr32     |  |  |  |
| Cdca71     | Olfml3   |  | Wisp1     |  |  |  |
| Cdgap      | Olfir558 |  | Zc3hav1   |  |  |  |
| Cdh1       | Omd      |  | Zdhhc20   |  |  |  |
| Cdk6       | Ostb     |  | Zfc3h1    |  |  |  |
| Cdk9       | P2rx7    |  | Zfp57     |  |  |  |
| Cdkn2aipnl | Pan3     |  | Zfp697    |  |  |  |
| Cdr2l      | Pbk      |  |           |  |  |  |
| Cdsn       | Pcdh17   |  |           |  |  |  |
| Cdt1       | Pcdhb16  |  |           |  |  |  |
| Cdv3       | Pde5a    |  |           |  |  |  |
| Cebpb      | Pdgfr1   |  |           |  |  |  |
| Cenpc1     | Pftk1    |  |           |  |  |  |
| Cenpt      | Phldb2   |  |           |  |  |  |
| Cfl1       | Pip4k2a  |  |           |  |  |  |
| Cfl2       | Pkd2     |  |           |  |  |  |
| Cgref1     | Plxdc2   |  |           |  |  |  |
| Chaf1b     | Plxnb2   |  |           |  |  |  |
| Chd1       | Polk     |  |           |  |  |  |
| Chd7       | Ppic     |  |           |  |  |  |
| Chd9       | Prc1     |  |           |  |  |  |
| Chi311     | Prep     |  |           |  |  |  |
| Chi313     | Prim2    |  |           |  |  |  |
| Chi314     | Prkd3    |  |           |  |  |  |
| Chic2      | Prnd     |  |           |  |  |  |
| Chka       | Prrg3    |  |           |  |  |  |
| Chmp4b     | Prss23   |  |           |  |  |  |
| Chmp4c     | Ptgs1    |  |           |  |  |  |
| Chrb1      | Ptplad2  |  |           |  |  |  |
| Chst11     | Ptprd    |  |           |  |  |  |

|            |              |  |  |  |  |
|------------|--------------|--|--|--|--|
| Chsy1      | Pvrl3        |  |  |  |  |
| Cirh1a     | RP23-38E20.1 |  |  |  |  |
| Ckap4      | Rab23        |  |  |  |  |
| Cks2       | Rab3d        |  |  |  |  |
| Clca1      | Rab711       |  |  |  |  |
| Clefl      | Rab8b        |  |  |  |  |
| Clcn5      | Racgap1      |  |  |  |  |
| Cldn15     | Rapgef5      |  |  |  |  |
| Clec4d     | Rbl1         |  |  |  |  |
| Clec4e     | Rbms3        |  |  |  |  |
| Clec5a     | Reep4        |  |  |  |  |
| Clic4      | Renbp        |  |  |  |  |
| Clic5      | Rgs4         |  |  |  |  |
| Cltb       | Rnasel       |  |  |  |  |
| Cltc       | Rnf213       |  |  |  |  |
| Cmpk1      | Rnf26        |  |  |  |  |
| Cndp2      | Rnu73a       |  |  |  |  |
| Cnih2      | Robo1        |  |  |  |  |
| Cnksr1     | Rock2        |  |  |  |  |
| Cnn2       | Rpl10a       |  |  |  |  |
| Cog3       | Rpl31        |  |  |  |  |
| Col18a1    | Rrm2         |  |  |  |  |
| Copb1      | Samd9l       |  |  |  |  |
| Copg       | Sash1        |  |  |  |  |
| Coro1a     | Sdc2         |  |  |  |  |
| Coro1b     | Sec62        |  |  |  |  |
| Coro2a     | Sema3c       |  |  |  |  |
| Cotl1      | Sephs1       |  |  |  |  |
| Cox18      | Serpinb8     |  |  |  |  |
| Cpne1      | Setdb2       |  |  |  |  |
| Cpne2      | Sez6l2       |  |  |  |  |
| Cpsf2      | Sh3d19       |  |  |  |  |
| Cpsf7      | Sipa111      |  |  |  |  |
| Cpt1a      | Slamf7       |  |  |  |  |
| Creb3      | Slamf9       |  |  |  |  |
| Creb3l1    | Slc16a12     |  |  |  |  |
| Creb5      | Slc35a3      |  |  |  |  |
| Creld2     | Slc39a10     |  |  |  |  |
| Crk        | Slc5a3       |  |  |  |  |
| Crkrs      | Smc4         |  |  |  |  |
| Crlf2      | Snai2        |  |  |  |  |
| Crmp1      | Snord16a     |  |  |  |  |
| Crte2      | Snord22      |  |  |  |  |
| Cry1       | Snord32a     |  |  |  |  |
| Cryab      | Snord35b     |  |  |  |  |
| Csf2rb     | Snord61      |  |  |  |  |
| Csf2rb2    | Sntb1        |  |  |  |  |
| Csf3r      | Sntb2        |  |  |  |  |
| Csgalnact1 | Sox18        |  |  |  |  |
| Csnk1d     | Sp110        |  |  |  |  |
| Csrp1      | Sp140        |  |  |  |  |
| Cstb       | Sp3          |  |  |  |  |
| Cstf2      | Spag5        |  |  |  |  |
| Ctdp1      | Sparc        |  |  |  |  |
| Ctla2b     | Sparc11      |  |  |  |  |
| Ctps       | Spc25        |  |  |  |  |
| Ctn        | Stap2        |  |  |  |  |
| Cul2       | Stmn1        |  |  |  |  |
| Cwf19l1    | Stox2        |  |  |  |  |
| Cxcl2      | Stx2         |  |  |  |  |
| Cxcl3      | Stxbp5       |  |  |  |  |
| Cxcr6      | Sulf1        |  |  |  |  |
| Cyfip1     | Tceal8       |  |  |  |  |
| Cyp1b1     | Tcf4         |  |  |  |  |
| Cyp20a1    | Thy1         |  |  |  |  |
| Cyp4f18    | Tlr3         |  |  |  |  |
| Cyr61      | Tlr8         |  |  |  |  |
| Cytip      | Tmem176b     |  |  |  |  |
| Dbf4       | Tmem195      |  |  |  |  |

|         |        |  |  |  |  |
|---------|--------|--|--|--|--|
| Dck     | Tmem67 |  |  |  |  |
| Dclre1b | Tmem71 |  |  |  |  |
| Dcpp1   | Tmem98 |  |  |  |  |
| Dctd    | Tmpo   |  |  |  |  |
| Dcun1d3 | Tnpol  |  |  |  |  |
| Dda1    | Top2a  |  |  |  |  |
| Ddr1    | Tpx2   |  |  |  |  |
| Ddx10   | Trem2  |  |  |  |  |
| Ddx19a  | Trib2  |  |  |  |  |
| Ddx19b  | Trim2  |  |  |  |  |
| Ddx21   | Trim25 |  |  |  |  |
| Ddx24   | Trim59 |  |  |  |  |
| Ddx27   | Trps1  |  |  |  |  |
| Ddx31   | Tspan6 |  |  |  |  |
| Ddx39   | Tug1   |  |  |  |  |
| Ddx50   | Ugcg   |  |  |  |  |
| Ddx54   | Vasn   |  |  |  |  |
| Ddx56   | Vgll3  |  |  |  |  |
| Defb13  | Vwa5a  |  |  |  |  |
| Degs1   | Wbp5   |  |  |  |  |
| Dera    | Xrcc4  |  |  |  |  |
| Dgkd    | Zbtb1  |  |  |  |  |
| Dgkh    | Zdhhc2 |  |  |  |  |
| Dhcr24  | Zfp26  |  |  |  |  |
| Dhrs9   | Zfp521 |  |  |  |  |
| Dhx32   | Zfp760 |  |  |  |  |
| Dhx37   | Zfp87  |  |  |  |  |
| Dhx38   |        |  |  |  |  |
| Dhx8    |        |  |  |  |  |
| Dhx9    |        |  |  |  |  |
| Diap1   |        |  |  |  |  |
| Dicer1  |        |  |  |  |  |
| Dimt1   |        |  |  |  |  |
| Dis3    |        |  |  |  |  |
| Dke1    |        |  |  |  |  |
| Dlg5    |        |  |  |  |  |
| Dlgap4  |        |  |  |  |  |
| Dll4    |        |  |  |  |  |
| Dnajb9  |        |  |  |  |  |
| Dnajc5  |        |  |  |  |  |
| Dnm2    |        |  |  |  |  |
| Dnttip2 |        |  |  |  |  |
| Dock2   |        |  |  |  |  |
| Dock4   |        |  |  |  |  |
| Dock5   |        |  |  |  |  |
| Dok1    |        |  |  |  |  |
| Dok3    |        |  |  |  |  |
| Dpep2   |        |  |  |  |  |
| Dpep3   |        |  |  |  |  |
| Dph2    |        |  |  |  |  |
| Dph5    |        |  |  |  |  |
| Dpy19l1 |        |  |  |  |  |
| Dtl     |        |  |  |  |  |
| Dusp26  |        |  |  |  |  |
| Dusp4   |        |  |  |  |  |
| Dusp5   |        |  |  |  |  |
| E2f3    |        |  |  |  |  |
| E2f7    |        |  |  |  |  |
| Eaf1    |        |  |  |  |  |
| Ear2    |        |  |  |  |  |
| Ece1    |        |  |  |  |  |
| Ecm1    |        |  |  |  |  |
| Ecsr    |        |  |  |  |  |
| Edn1    |        |  |  |  |  |
| Eef1b2  |        |  |  |  |  |
| Eef1e1  |        |  |  |  |  |
| Eef1g   |        |  |  |  |  |
| Eef2k   |        |  |  |  |  |
| Efna5   |        |  |  |  |  |

|          |  |  |  |  |  |  |
|----------|--|--|--|--|--|--|
| Eftud1   |  |  |  |  |  |  |
| Eftud2   |  |  |  |  |  |  |
| Egln3    |  |  |  |  |  |  |
| Eid3     |  |  |  |  |  |  |
| Eif2ak3  |  |  |  |  |  |  |
| Eif2b3   |  |  |  |  |  |  |
| Eif2c2   |  |  |  |  |  |  |
| Eif2s1   |  |  |  |  |  |  |
| Eif2s2   |  |  |  |  |  |  |
| Eif3b    |  |  |  |  |  |  |
| Eif3d    |  |  |  |  |  |  |
| Eif4a1   |  |  |  |  |  |  |
| Eif4ebp1 |  |  |  |  |  |  |
| Eif5     |  |  |  |  |  |  |
| Eif5a2   |  |  |  |  |  |  |
| Eif6     |  |  |  |  |  |  |
| Elav11   |  |  |  |  |  |  |
| Elk4     |  |  |  |  |  |  |
| Ell      |  |  |  |  |  |  |
| Ell2     |  |  |  |  |  |  |
| Elmo2    |  |  |  |  |  |  |
| Elov11   |  |  |  |  |  |  |
| Elov16   |  |  |  |  |  |  |
| Emb      |  |  |  |  |  |  |
| Emilin1  |  |  |  |  |  |  |
| Eml3     |  |  |  |  |  |  |
| Emp2     |  |  |  |  |  |  |
| Eno1     |  |  |  |  |  |  |
| Entpd3   |  |  |  |  |  |  |
| Entpd7   |  |  |  |  |  |  |
| Epb4.111 |  |  |  |  |  |  |
| Epha2    |  |  |  |  |  |  |
| Eps8     |  |  |  |  |  |  |
| Erbb2ip  |  |  |  |  |  |  |
| Ercc1    |  |  |  |  |  |  |
| Ercc61   |  |  |  |  |  |  |
| Erh      |  |  |  |  |  |  |
| Erlin1   |  |  |  |  |  |  |
| Ero11    |  |  |  |  |  |  |
| Esd      |  |  |  |  |  |  |
| Etf1     |  |  |  |  |  |  |
| Etv4     |  |  |  |  |  |  |
| Evi1     |  |  |  |  |  |  |
| Evi5     |  |  |  |  |  |  |
| Exoc1    |  |  |  |  |  |  |
| Exoc5    |  |  |  |  |  |  |
| Exosc1   |  |  |  |  |  |  |
| Exosc2   |  |  |  |  |  |  |
| F10      |  |  |  |  |  |  |
| F13a1    |  |  |  |  |  |  |
| F5       |  |  |  |  |  |  |
| F7       |  |  |  |  |  |  |
| Fads3    |  |  |  |  |  |  |
| Fam105b  |  |  |  |  |  |  |
| Fam107b  |  |  |  |  |  |  |
| Fam117b  |  |  |  |  |  |  |
| Fam13b   |  |  |  |  |  |  |
| Fam160a2 |  |  |  |  |  |  |
| Fam160b1 |  |  |  |  |  |  |
| Fam167a  |  |  |  |  |  |  |
| Fam169b  |  |  |  |  |  |  |
| Fam20c   |  |  |  |  |  |  |
| Fam38a   |  |  |  |  |  |  |
| Fam40a   |  |  |  |  |  |  |
| Fam46b   |  |  |  |  |  |  |
| Fam46c   |  |  |  |  |  |  |
| Fam49b   |  |  |  |  |  |  |
| Fam57a   |  |  |  |  |  |  |
| Fam60a   |  |  |  |  |  |  |

|           |  |  |  |  |  |  |
|-----------|--|--|--|--|--|--|
| Fam71f2   |  |  |  |  |  |  |
| Farp1     |  |  |  |  |  |  |
| Farsa     |  |  |  |  |  |  |
| Fbl       |  |  |  |  |  |  |
| Fbx15     |  |  |  |  |  |  |
| Fbxo38    |  |  |  |  |  |  |
| Fbxw10    |  |  |  |  |  |  |
| Fbxw11    |  |  |  |  |  |  |
| Fbxw9     |  |  |  |  |  |  |
| Fcgr1     |  |  |  |  |  |  |
| Fcgr2b    |  |  |  |  |  |  |
| Fcgr4     |  |  |  |  |  |  |
| Fcrlb     |  |  |  |  |  |  |
| Fem1c     |  |  |  |  |  |  |
| Fen1      |  |  |  |  |  |  |
| Fermt2    |  |  |  |  |  |  |
| Fermt3    |  |  |  |  |  |  |
| Fes       |  |  |  |  |  |  |
| Fgd3      |  |  |  |  |  |  |
| Fgd6      |  |  |  |  |  |  |
| Fgf23     |  |  |  |  |  |  |
| Fgr       |  |  |  |  |  |  |
| Fhl1      |  |  |  |  |  |  |
| Fhl3      |  |  |  |  |  |  |
| Fhod1     |  |  |  |  |  |  |
| Fjx1      |  |  |  |  |  |  |
| Fkbp10    |  |  |  |  |  |  |
| Fkbp11    |  |  |  |  |  |  |
| Fkbp14    |  |  |  |  |  |  |
| Fkbp1a    |  |  |  |  |  |  |
| Flna      |  |  |  |  |  |  |
| Flt4      |  |  |  |  |  |  |
| Fmn1      |  |  |  |  |  |  |
| Fmnl2     |  |  |  |  |  |  |
| Fmr1      |  |  |  |  |  |  |
| Fnbp4     |  |  |  |  |  |  |
| Fosb      |  |  |  |  |  |  |
| Fosl1     |  |  |  |  |  |  |
| Foxn2     |  |  |  |  |  |  |
| Fpgs      |  |  |  |  |  |  |
| Fpr1      |  |  |  |  |  |  |
| Fpr3      |  |  |  |  |  |  |
| Freq      |  |  |  |  |  |  |
| Frmd4a    |  |  |  |  |  |  |
| Fscn1     |  |  |  |  |  |  |
| Fstl3     |  |  |  |  |  |  |
| Ftsj3     |  |  |  |  |  |  |
| Fubp3     |  |  |  |  |  |  |
| Furin     |  |  |  |  |  |  |
| Fut4      |  |  |  |  |  |  |
| Fxyd5     |  |  |  |  |  |  |
| G6pd2     |  |  |  |  |  |  |
| G6pdx     |  |  |  |  |  |  |
| Gabarapl2 |  |  |  |  |  |  |
| Gabre     |  |  |  |  |  |  |
| Gadd45b   |  |  |  |  |  |  |
| Gak       |  |  |  |  |  |  |
| Gale      |  |  |  |  |  |  |
| Galk1     |  |  |  |  |  |  |
| Galns     |  |  |  |  |  |  |
| Galnt6    |  |  |  |  |  |  |
| Galnt11   |  |  |  |  |  |  |
| Gan       |  |  |  |  |  |  |
| Gapt      |  |  |  |  |  |  |
| Gar1      |  |  |  |  |  |  |
| Gars      |  |  |  |  |  |  |
| Gas211    |  |  |  |  |  |  |
| Gas7      |  |  |  |  |  |  |
| Gatad2a   |  |  |  |  |  |  |



|         |  |  |  |  |  |  |
|---------|--|--|--|--|--|--|
| Gba     |  |  |  |  |  |  |
| Gbe1    |  |  |  |  |  |  |
| Gclc    |  |  |  |  |  |  |
| Gclm    |  |  |  |  |  |  |
| Gent1   |  |  |  |  |  |  |
| Gent2   |  |  |  |  |  |  |
| Gda     |  |  |  |  |  |  |
| Gdf6    |  |  |  |  |  |  |
| Gdi2    |  |  |  |  |  |  |
| Gemin5  |  |  |  |  |  |  |
| Gemin6  |  |  |  |  |  |  |
| Gfod1   |  |  |  |  |  |  |
| Gfpt1   |  |  |  |  |  |  |
| Gimap7  |  |  |  |  |  |  |
| Gins2   |  |  |  |  |  |  |
| Gipc1   |  |  |  |  |  |  |
| Gipr    |  |  |  |  |  |  |
| Gje1    |  |  |  |  |  |  |
| Glipr2  |  |  |  |  |  |  |
| Glis3   |  |  |  |  |  |  |
| Glrx    |  |  |  |  |  |  |
| Glt8d3  |  |  |  |  |  |  |
| Glul    |  |  |  |  |  |  |
| Gm1862  |  |  |  |  |  |  |
| Gm1964  |  |  |  |  |  |  |
| Gm22    |  |  |  |  |  |  |
| Gm340   |  |  |  |  |  |  |
| Gm672   |  |  |  |  |  |  |
| Gm885   |  |  |  |  |  |  |
| Gmds    |  |  |  |  |  |  |
| Gmeb2   |  |  |  |  |  |  |
| Gmfb    |  |  |  |  |  |  |
| Gmfg    |  |  |  |  |  |  |
| Gmip    |  |  |  |  |  |  |
| Gna13   |  |  |  |  |  |  |
| Gnai3   |  |  |  |  |  |  |
| Gnb1    |  |  |  |  |  |  |
| Gnb211  |  |  |  |  |  |  |
| Gng12   |  |  |  |  |  |  |
| Gngt2   |  |  |  |  |  |  |
| Gnl3    |  |  |  |  |  |  |
| Gnpnat1 |  |  |  |  |  |  |
| Golt1b  |  |  |  |  |  |  |
| Gorab   |  |  |  |  |  |  |
| Gorasp2 |  |  |  |  |  |  |
| Gosr2   |  |  |  |  |  |  |
| Gpatch4 |  |  |  |  |  |  |
| Gpd1    |  |  |  |  |  |  |
| Gpihbp1 |  |  |  |  |  |  |
| Gpn2    |  |  |  |  |  |  |
| Gpr141  |  |  |  |  |  |  |
| Gpr172b |  |  |  |  |  |  |
| Gpr35   |  |  |  |  |  |  |
| Gpr39   |  |  |  |  |  |  |
| Gpr64   |  |  |  |  |  |  |
| Gpr97   |  |  |  |  |  |  |
| Gprec5a |  |  |  |  |  |  |
| Gpx1    |  |  |  |  |  |  |
| Grap    |  |  |  |  |  |  |
| Grhl1   |  |  |  |  |  |  |
| Grk6    |  |  |  |  |  |  |
| Grwd1   |  |  |  |  |  |  |
| Grxcr1  |  |  |  |  |  |  |
| Gsr     |  |  |  |  |  |  |
| Gss     |  |  |  |  |  |  |
| Gsta1   |  |  |  |  |  |  |
| Gsta2   |  |  |  |  |  |  |
| Gsted   |  |  |  |  |  |  |
| Gtf2f1  |  |  |  |  |  |  |

|           |  |  |  |  |  |  |
|-----------|--|--|--|--|--|--|
| Gtf2f2    |  |  |  |  |  |  |
| Gtpbp4    |  |  |  |  |  |  |
| Gtpbp6    |  |  |  |  |  |  |
| H13       |  |  |  |  |  |  |
| H2-M10.3  |  |  |  |  |  |  |
| H2-Q10    |  |  |  |  |  |  |
| H3f3b     |  |  |  |  |  |  |
| H6pd      |  |  |  |  |  |  |
| Hars      |  |  |  |  |  |  |
| Haus6     |  |  |  |  |  |  |
| Haus7     |  |  |  |  |  |  |
| Havcr2    |  |  |  |  |  |  |
| Hax1      |  |  |  |  |  |  |
| Hba-a1    |  |  |  |  |  |  |
| Hba-a2    |  |  |  |  |  |  |
| Hbb-b1    |  |  |  |  |  |  |
| Hcls1     |  |  |  |  |  |  |
| Hdac1     |  |  |  |  |  |  |
| Hdac6     |  |  |  |  |  |  |
| Hdc       |  |  |  |  |  |  |
| Heatr1    |  |  |  |  |  |  |
| Hells     |  |  |  |  |  |  |
| Hgs       |  |  |  |  |  |  |
| Hipk1     |  |  |  |  |  |  |
| Hk1       |  |  |  |  |  |  |
| Hk3       |  |  |  |  |  |  |
| Hmg111    |  |  |  |  |  |  |
| Hmga1     |  |  |  |  |  |  |
| Hmgb1     |  |  |  |  |  |  |
| Hmgb2     |  |  |  |  |  |  |
| Hmgcr     |  |  |  |  |  |  |
| Hmgn1     |  |  |  |  |  |  |
| Hmha1     |  |  |  |  |  |  |
| Hnrnpa0   |  |  |  |  |  |  |
| Hnrnpa1   |  |  |  |  |  |  |
| Hnrnpa112 |  |  |  |  |  |  |
| Hnrnpa3   |  |  |  |  |  |  |
| Hnrmpk    |  |  |  |  |  |  |
| Hp        |  |  |  |  |  |  |
| Hps3      |  |  |  |  |  |  |
| Hpse      |  |  |  |  |  |  |
| Hrct1     |  |  |  |  |  |  |
| Hsd17b11  |  |  |  |  |  |  |
| Hsd3b4    |  |  |  |  |  |  |
| Hspa13    |  |  |  |  |  |  |
| Hspb1     |  |  |  |  |  |  |
| Hspb2     |  |  |  |  |  |  |
| Htr2a     |  |  |  |  |  |  |
| Htt       |  |  |  |  |  |  |
| Hyou1     |  |  |  |  |  |  |
| Ibtk      |  |  |  |  |  |  |
| Id2       |  |  |  |  |  |  |
| Iffo2     |  |  |  |  |  |  |
| Ifi30     |  |  |  |  |  |  |
| Ifitm1    |  |  |  |  |  |  |
| Ifitm6    |  |  |  |  |  |  |
| Ifrd1     |  |  |  |  |  |  |
| Igf1r     |  |  |  |  |  |  |
| Igf2bp2   |  |  |  |  |  |  |
| Igsf2     |  |  |  |  |  |  |
| Igsf6     |  |  |  |  |  |  |
| Ikbke     |  |  |  |  |  |  |
| Ikzf1     |  |  |  |  |  |  |
| Il11      |  |  |  |  |  |  |
| Il17ra    |  |  |  |  |  |  |
| Il18rap   |  |  |  |  |  |  |
| Il1f9     |  |  |  |  |  |  |
| Il1r2     |  |  |  |  |  |  |
| Il1rap    |  |  |  |  |  |  |

|          |  |  |  |  |  |  |
|----------|--|--|--|--|--|--|
| Ii20rb   |  |  |  |  |  |  |
| Ii4ra    |  |  |  |  |  |  |
| Ii8rb    |  |  |  |  |  |  |
| Iik      |  |  |  |  |  |  |
| Impdh1   |  |  |  |  |  |  |
| Impdh2   |  |  |  |  |  |  |
| Inhba    |  |  |  |  |  |  |
| Inhbb    |  |  |  |  |  |  |
| Ino80    |  |  |  |  |  |  |
| Ino80c   |  |  |  |  |  |  |
| Ip6k2    |  |  |  |  |  |  |
| Ipo4     |  |  |  |  |  |  |
| Ipo7     |  |  |  |  |  |  |
| Ippk     |  |  |  |  |  |  |
| Irak3    |  |  |  |  |  |  |
| Irak4    |  |  |  |  |  |  |
| Irf8     |  |  |  |  |  |  |
| Irg1     |  |  |  |  |  |  |
| Irs2     |  |  |  |  |  |  |
| Itga2    |  |  |  |  |  |  |
| Itga2b   |  |  |  |  |  |  |
| Itga3    |  |  |  |  |  |  |
| Itga7    |  |  |  |  |  |  |
| Itgal    |  |  |  |  |  |  |
| Itgam    |  |  |  |  |  |  |
| Itgb1bp3 |  |  |  |  |  |  |
| Itgb2    |  |  |  |  |  |  |
| Itgb3    |  |  |  |  |  |  |
| Itgb7    |  |  |  |  |  |  |
| Itpk1    |  |  |  |  |  |  |
| Itpkc    |  |  |  |  |  |  |
| Itp3     |  |  |  |  |  |  |
| Jmjd6    |  |  |  |  |  |  |
| Jtv1     |  |  |  |  |  |  |
| Jub      |  |  |  |  |  |  |
| Kbtbd10  |  |  |  |  |  |  |
| Kcne3    |  |  |  |  |  |  |
| Kcne4    |  |  |  |  |  |  |
| Kcnn4    |  |  |  |  |  |  |
| Kctd17   |  |  |  |  |  |  |
| Kctd18   |  |  |  |  |  |  |
| Kctd5    |  |  |  |  |  |  |
| Kdm3a    |  |  |  |  |  |  |
| Kdm5c    |  |  |  |  |  |  |
| Khdrbs1  |  |  |  |  |  |  |
| Kif21b   |  |  |  |  |  |  |
| Kif3b    |  |  |  |  |  |  |
| Klf10    |  |  |  |  |  |  |
| Klf16    |  |  |  |  |  |  |
| Klf6     |  |  |  |  |  |  |
| Klhde4   |  |  |  |  |  |  |
| Klh12    |  |  |  |  |  |  |
| Klh16    |  |  |  |  |  |  |
| Klra2    |  |  |  |  |  |  |
| Kpnb1    |  |  |  |  |  |  |
| Kri1     |  |  |  |  |  |  |
| Krt19    |  |  |  |  |  |  |
| Krt8     |  |  |  |  |  |  |
| Krt80    |  |  |  |  |  |  |
| Lamc2    |  |  |  |  |  |  |
| Larp1    |  |  |  |  |  |  |
| Lasp1    |  |  |  |  |  |  |
| Lass2    |  |  |  |  |  |  |
| Lass3    |  |  |  |  |  |  |
| Lass6    |  |  |  |  |  |  |
| Lats1    |  |  |  |  |  |  |
| Lcn2     |  |  |  |  |  |  |
| Lcp2     |  |  |  |  |  |  |
| Ldb2     |  |  |  |  |  |  |

|         |  |  |  |  |  |  |
|---------|--|--|--|--|--|--|
| Ldlr    |  |  |  |  |  |  |
| Ldlrap1 |  |  |  |  |  |  |
| Lgals1  |  |  |  |  |  |  |
| Lig3    |  |  |  |  |  |  |
| Lilrb3  |  |  |  |  |  |  |
| Limd1   |  |  |  |  |  |  |
| Limk1   |  |  |  |  |  |  |
| Lin7c   |  |  |  |  |  |  |
| Lipg    |  |  |  |  |  |  |
| Llph    |  |  |  |  |  |  |
| Lmbr11  |  |  |  |  |  |  |
| Lmnb1   |  |  |  |  |  |  |
| Lonrf3  |  |  |  |  |  |  |
| Lox     |  |  |  |  |  |  |
| Lox14   |  |  |  |  |  |  |
| Lpcat3  |  |  |  |  |  |  |
| Lpcat4  |  |  |  |  |  |  |
| Lpxn    |  |  |  |  |  |  |
| Lrp10   |  |  |  |  |  |  |
| Lrrc32  |  |  |  |  |  |  |
| Lrrc49  |  |  |  |  |  |  |
| Lrrc58  |  |  |  |  |  |  |
| Lrrc59  |  |  |  |  |  |  |
| Lrrc8c  |  |  |  |  |  |  |
| Lrrc8d  |  |  |  |  |  |  |
| Lrrfip1 |  |  |  |  |  |  |
| Lsg1    |  |  |  |  |  |  |
| Lss     |  |  |  |  |  |  |
| Ltbr    |  |  |  |  |  |  |
| Ltv1    |  |  |  |  |  |  |
| Ly6g    |  |  |  |  |  |  |
| Lyn     |  |  |  |  |  |  |
| Lypd1   |  |  |  |  |  |  |
| Magi1   |  |  |  |  |  |  |
| Mak16   |  |  |  |  |  |  |
| Mal     |  |  |  |  |  |  |
| Mall    |  |  |  |  |  |  |
| Malt1   |  |  |  |  |  |  |
| Maml1   |  |  |  |  |  |  |
| Manbal  |  |  |  |  |  |  |
| Map2k1  |  |  |  |  |  |  |
| Map2k3  |  |  |  |  |  |  |
| Map2k4  |  |  |  |  |  |  |
| Map4k4  |  |  |  |  |  |  |
| Map4k5  |  |  |  |  |  |  |
| Mapk11  |  |  |  |  |  |  |
| Mapk6   |  |  |  |  |  |  |
| Mapk7   |  |  |  |  |  |  |
| Mast4   |  |  |  |  |  |  |
| Mbc2    |  |  |  |  |  |  |
| Mbd1    |  |  |  |  |  |  |
| Mbn12   |  |  |  |  |  |  |
| Mboat2  |  |  |  |  |  |  |
| Mcm3    |  |  |  |  |  |  |
| Mcm4    |  |  |  |  |  |  |
| Mcm9    |  |  |  |  |  |  |
| Mctp2   |  |  |  |  |  |  |
| Mdfi    |  |  |  |  |  |  |
| Mdn1    |  |  |  |  |  |  |
| Me2     |  |  |  |  |  |  |
| Med13l  |  |  |  |  |  |  |
| Med14   |  |  |  |  |  |  |
| Med8    |  |  |  |  |  |  |
| Mertk   |  |  |  |  |  |  |
| Met     |  |  |  |  |  |  |
| Mettl1  |  |  |  |  |  |  |
| Mettl13 |  |  |  |  |  |  |
| Mettl9  |  |  |  |  |  |  |
| Mex3d   |  |  |  |  |  |  |

|           |  |  |  |  |  |  |
|-----------|--|--|--|--|--|--|
| Mfsd10    |  |  |  |  |  |  |
| Mfsd7b    |  |  |  |  |  |  |
| Mical1    |  |  |  |  |  |  |
| Mical2    |  |  |  |  |  |  |
| Micall1   |  |  |  |  |  |  |
| Micall2   |  |  |  |  |  |  |
| Midn      |  |  |  |  |  |  |
| Mif       |  |  |  |  |  |  |
| Mirhg1    |  |  |  |  |  |  |
| Mki67ip   |  |  |  |  |  |  |
| Mkrn1     |  |  |  |  |  |  |
| Mlxip     |  |  |  |  |  |  |
| Mmadhc    |  |  |  |  |  |  |
| Mmp12     |  |  |  |  |  |  |
| Mmp19     |  |  |  |  |  |  |
| Mmp25     |  |  |  |  |  |  |
| Mmp3      |  |  |  |  |  |  |
| Mmp8      |  |  |  |  |  |  |
| Mmp9      |  |  |  |  |  |  |
| Mobk11a   |  |  |  |  |  |  |
| Mogs      |  |  |  |  |  |  |
| Morc2a    |  |  |  |  |  |  |
| Morf4l2   |  |  |  |  |  |  |
| Mospd4    |  |  |  |  |  |  |
| Mpg       |  |  |  |  |  |  |
| Mphosph10 |  |  |  |  |  |  |
| Mphosph6  |  |  |  |  |  |  |
| Mrps18b   |  |  |  |  |  |  |
| Mrto4     |  |  |  |  |  |  |
| Ms4a15    |  |  |  |  |  |  |
| Ms4a4a    |  |  |  |  |  |  |
| Ms4a8a    |  |  |  |  |  |  |
| Msr1      |  |  |  |  |  |  |
| Mt1       |  |  |  |  |  |  |
| Mt2       |  |  |  |  |  |  |
| Mtbp      |  |  |  |  |  |  |
| Mthfd11   |  |  |  |  |  |  |
| Mthfd2    |  |  |  |  |  |  |
| Mthfr     |  |  |  |  |  |  |
| Mttr12    |  |  |  |  |  |  |
| Mttr9     |  |  |  |  |  |  |
| Mtpn      |  |  |  |  |  |  |
| Muc1      |  |  |  |  |  |  |
| Mvp       |  |  |  |  |  |  |
| Mxd1      |  |  |  |  |  |  |
| Myadm     |  |  |  |  |  |  |
| Mybbp1a   |  |  |  |  |  |  |
| Myd116    |  |  |  |  |  |  |
| Myd88     |  |  |  |  |  |  |
| Myo1c     |  |  |  |  |  |  |
| Myo1h     |  |  |  |  |  |  |
| Myo9b     |  |  |  |  |  |  |
| Myoz1     |  |  |  |  |  |  |
| Myst2     |  |  |  |  |  |  |
| Nacc1     |  |  |  |  |  |  |
| Nadk      |  |  |  |  |  |  |
| Naip1     |  |  |  |  |  |  |
| Naip2     |  |  |  |  |  |  |
| Nans      |  |  |  |  |  |  |
| Napsa     |  |  |  |  |  |  |
| Nars      |  |  |  |  |  |  |
| Nat10     |  |  |  |  |  |  |
| Nav2      |  |  |  |  |  |  |
| Nedn      |  |  |  |  |  |  |
| Ncf1      |  |  |  |  |  |  |
| Ncf2      |  |  |  |  |  |  |
| Ncf4      |  |  |  |  |  |  |
| Nckap1    |  |  |  |  |  |  |
| Ncl       |  |  |  |  |  |  |

|          |  |  |  |  |  |  |
|----------|--|--|--|--|--|--|
| Ncor2    |  |  |  |  |  |  |
| Ndrp1    |  |  |  |  |  |  |
| Ndst1    |  |  |  |  |  |  |
| Nfam1    |  |  |  |  |  |  |
| Nfe2l2   |  |  |  |  |  |  |
| Nfil3    |  |  |  |  |  |  |
| Nfkb2    |  |  |  |  |  |  |
| Nhedc2   |  |  |  |  |  |  |
| Nhp2     |  |  |  |  |  |  |
| Ninj1    |  |  |  |  |  |  |
| Nip7     |  |  |  |  |  |  |
| Nkrf     |  |  |  |  |  |  |
| Nlrp3    |  |  |  |  |  |  |
| Nobl     |  |  |  |  |  |  |
| Noc3l    |  |  |  |  |  |  |
| Nol10    |  |  |  |  |  |  |
| Nol12    |  |  |  |  |  |  |
| Nol6     |  |  |  |  |  |  |
| Nol9     |  |  |  |  |  |  |
| Nolc1    |  |  |  |  |  |  |
| Nop14    |  |  |  |  |  |  |
| Nop16    |  |  |  |  |  |  |
| Nop2     |  |  |  |  |  |  |
| Nop56    |  |  |  |  |  |  |
| Nop58    |  |  |  |  |  |  |
| Nos2     |  |  |  |  |  |  |
| Notch2   |  |  |  |  |  |  |
| Notch4   |  |  |  |  |  |  |
| Npm1     |  |  |  |  |  |  |
| Npy      |  |  |  |  |  |  |
| Nr2c2ap  |  |  |  |  |  |  |
| Nras     |  |  |  |  |  |  |
| Nrgn     |  |  |  |  |  |  |
| Nrm      |  |  |  |  |  |  |
| Nsf      |  |  |  |  |  |  |
| Nsun2    |  |  |  |  |  |  |
| Nt5c     |  |  |  |  |  |  |
| Nts      |  |  |  |  |  |  |
| Nudcd1   |  |  |  |  |  |  |
| Nudcd2   |  |  |  |  |  |  |
| Nufip1   |  |  |  |  |  |  |
| Nup107   |  |  |  |  |  |  |
| Nup153   |  |  |  |  |  |  |
| Nup205   |  |  |  |  |  |  |
| Nup210l  |  |  |  |  |  |  |
| Nup43    |  |  |  |  |  |  |
| Nup50    |  |  |  |  |  |  |
| Nup54    |  |  |  |  |  |  |
| Nup93    |  |  |  |  |  |  |
| Nup98    |  |  |  |  |  |  |
| Nupl1    |  |  |  |  |  |  |
| Nxn      |  |  |  |  |  |  |
| Oas3     |  |  |  |  |  |  |
| Obfc2a   |  |  |  |  |  |  |
| Odc1     |  |  |  |  |  |  |
| Olfir161 |  |  |  |  |  |  |
| Olfir920 |  |  |  |  |  |  |
| Olr1     |  |  |  |  |  |  |
| Orc2l    |  |  |  |  |  |  |
| Orc6l    |  |  |  |  |  |  |
| Osbp110  |  |  |  |  |  |  |
| Osbp15   |  |  |  |  |  |  |
| Osgin1   |  |  |  |  |  |  |
| Ostc     |  |  |  |  |  |  |
| Ostf1    |  |  |  |  |  |  |
| Otub1    |  |  |  |  |  |  |
| Otx1     |  |  |  |  |  |  |
| Oxsr1    |  |  |  |  |  |  |
| P2ry13   |  |  |  |  |  |  |

|          |  |  |  |  |  |  |
|----------|--|--|--|--|--|--|
| P4hb     |  |  |  |  |  |  |
| Pa2g4    |  |  |  |  |  |  |
| Pabpc11  |  |  |  |  |  |  |
| Pafah1b3 |  |  |  |  |  |  |
| Pag1     |  |  |  |  |  |  |
| Pak1     |  |  |  |  |  |  |
| Pak1ip1  |  |  |  |  |  |  |
| Pak2     |  |  |  |  |  |  |
| Pak3     |  |  |  |  |  |  |
| Pak4     |  |  |  |  |  |  |
| Pak6     |  |  |  |  |  |  |
| Papss1   |  |  |  |  |  |  |
| Pard6b   |  |  |  |  |  |  |
| Parvb    |  |  |  |  |  |  |
| Parvg    |  |  |  |  |  |  |
| Pask     |  |  |  |  |  |  |
| Pcbp3    |  |  |  |  |  |  |
| Pcdhb17  |  |  |  |  |  |  |
| Pcna     |  |  |  |  |  |  |
| Pcnx13   |  |  |  |  |  |  |
| Pctk3    |  |  |  |  |  |  |
| Pded10   |  |  |  |  |  |  |
| Pded11   |  |  |  |  |  |  |
| Pdc6ip   |  |  |  |  |  |  |
| Pde1a    |  |  |  |  |  |  |
| Pde1b    |  |  |  |  |  |  |
| Pdgfra   |  |  |  |  |  |  |
| Pdia4    |  |  |  |  |  |  |
| Pdia5    |  |  |  |  |  |  |
| Pdk4     |  |  |  |  |  |  |
| Pdpl1    |  |  |  |  |  |  |
| Pdpln    |  |  |  |  |  |  |
| Pdzrn3   |  |  |  |  |  |  |
| Pecam1   |  |  |  |  |  |  |
| Per2     |  |  |  |  |  |  |
| Pes1     |  |  |  |  |  |  |
| Pex14    |  |  |  |  |  |  |
| Pf4      |  |  |  |  |  |  |
| Pfkfb3   |  |  |  |  |  |  |
| Pfkfb4   |  |  |  |  |  |  |
| Pfn1     |  |  |  |  |  |  |
| Pgd      |  |  |  |  |  |  |
| Pgf      |  |  |  |  |  |  |
| Pgk1     |  |  |  |  |  |  |
| Pglyrp1  |  |  |  |  |  |  |
| Pgm3     |  |  |  |  |  |  |
| Pgrmc1   |  |  |  |  |  |  |
| Pgs1     |  |  |  |  |  |  |
| Phactr4  |  |  |  |  |  |  |
| Phf20    |  |  |  |  |  |  |
| Phlda3   |  |  |  |  |  |  |
| Pi15     |  |  |  |  |  |  |
| Pi4k2a   |  |  |  |  |  |  |
| Pi4k2b   |  |  |  |  |  |  |
| Pik3c2a  |  |  |  |  |  |  |
| Pik3cd   |  |  |  |  |  |  |
| Pik3r5   |  |  |  |  |  |  |
| Pilra    |  |  |  |  |  |  |
| Pion     |  |  |  |  |  |  |
| Pip5k1a  |  |  |  |  |  |  |
| Pira2    |  |  |  |  |  |  |
| Pira3    |  |  |  |  |  |  |
| Pitpna   |  |  |  |  |  |  |
| Pitpnm1  |  |  |  |  |  |  |
| Pkm2     |  |  |  |  |  |  |
| Pkmyt1   |  |  |  |  |  |  |
| Pkn2     |  |  |  |  |  |  |
| Pknox1   |  |  |  |  |  |  |
| Pla2g4a  |  |  |  |  |  |  |

|          |  |  |  |  |  |  |
|----------|--|--|--|--|--|--|
| Pla2g7   |  |  |  |  |  |  |
| Plac8    |  |  |  |  |  |  |
| Plau     |  |  |  |  |  |  |
| Plcxd2   |  |  |  |  |  |  |
| Plek     |  |  |  |  |  |  |
| Plekha1  |  |  |  |  |  |  |
| Plekha2  |  |  |  |  |  |  |
| Plekhg1  |  |  |  |  |  |  |
| Plekhm3  |  |  |  |  |  |  |
| Plekho2  |  |  |  |  |  |  |
| Plod3    |  |  |  |  |  |  |
| Plscr3   |  |  |  |  |  |  |
| Plvap    |  |  |  |  |  |  |
| Plxna2   |  |  |  |  |  |  |
| Pmepa1   |  |  |  |  |  |  |
| Pnp1     |  |  |  |  |  |  |
| Pola2    |  |  |  |  |  |  |
| Pold4    |  |  |  |  |  |  |
| Pole3    |  |  |  |  |  |  |
| Polh     |  |  |  |  |  |  |
| Polr1b   |  |  |  |  |  |  |
| Polr2a   |  |  |  |  |  |  |
| Polr3e   |  |  |  |  |  |  |
| Pols     |  |  |  |  |  |  |
| Pom121   |  |  |  |  |  |  |
| Pop1     |  |  |  |  |  |  |
| Pop4     |  |  |  |  |  |  |
| Por      |  |  |  |  |  |  |
| Ppan     |  |  |  |  |  |  |
| Ppapdc1b |  |  |  |  |  |  |
| Ppbb     |  |  |  |  |  |  |
| Ppfibp1  |  |  |  |  |  |  |
| Pphln1   |  |  |  |  |  |  |
| Ppib     |  |  |  |  |  |  |
| Ppm1j    |  |  |  |  |  |  |
| Ppme1    |  |  |  |  |  |  |
| Ppp1r14b |  |  |  |  |  |  |
| Ppp1r15b |  |  |  |  |  |  |
| Ppp1r2   |  |  |  |  |  |  |
| Ppp2cb   |  |  |  |  |  |  |
| Ppp2r1b  |  |  |  |  |  |  |
| Ppp2r2a  |  |  |  |  |  |  |
| Ppp4c    |  |  |  |  |  |  |
| Ppp4r1   |  |  |  |  |  |  |
| Pram1    |  |  |  |  |  |  |
| Prdm4    |  |  |  |  |  |  |
| Prdx6    |  |  |  |  |  |  |
| Prep     |  |  |  |  |  |  |
| Prg4     |  |  |  |  |  |  |
| Prkaa1   |  |  |  |  |  |  |
| Prkab2   |  |  |  |  |  |  |
| Prkar2b  |  |  |  |  |  |  |
| Prked    |  |  |  |  |  |  |
| Prkx     |  |  |  |  |  |  |
| Prmt1    |  |  |  |  |  |  |
| Prnp     |  |  |  |  |  |  |
| Procr    |  |  |  |  |  |  |
| Prpf31   |  |  |  |  |  |  |
| Prpf40a  |  |  |  |  |  |  |
| Prr3     |  |  |  |  |  |  |
| Prrc1    |  |  |  |  |  |  |
| Psat1    |  |  |  |  |  |  |
| Psd4     |  |  |  |  |  |  |
| Psma3    |  |  |  |  |  |  |
| Psma5    |  |  |  |  |  |  |
| Psmc1    |  |  |  |  |  |  |
| Psmc4    |  |  |  |  |  |  |
| Psmd11   |  |  |  |  |  |  |
| Psmd14   |  |  |  |  |  |  |



|           |  |  |  |  |  |  |
|-----------|--|--|--|--|--|--|
| Psm3      |  |  |  |  |  |  |
| Psm8      |  |  |  |  |  |  |
| Psmg3     |  |  |  |  |  |  |
| Pstpip1   |  |  |  |  |  |  |
| Ptbp1     |  |  |  |  |  |  |
| Ptbp2     |  |  |  |  |  |  |
| Ptk2      |  |  |  |  |  |  |
| Ptk2b     |  |  |  |  |  |  |
| Ptk7      |  |  |  |  |  |  |
| Ptma      |  |  |  |  |  |  |
| Ptp4a1    |  |  |  |  |  |  |
| Ptpn22    |  |  |  |  |  |  |
| Ptpn23    |  |  |  |  |  |  |
| Ptpre     |  |  |  |  |  |  |
| Ptrh1     |  |  |  |  |  |  |
| Ptx3      |  |  |  |  |  |  |
| Purb      |  |  |  |  |  |  |
| Pus1      |  |  |  |  |  |  |
| Pus7      |  |  |  |  |  |  |
| Pus7l     |  |  |  |  |  |  |
| Pusl1     |  |  |  |  |  |  |
| Pvr       |  |  |  |  |  |  |
| Pvrl1     |  |  |  |  |  |  |
| Pwp2      |  |  |  |  |  |  |
| Pxn       |  |  |  |  |  |  |
| Pycl1     |  |  |  |  |  |  |
| Pycl2     |  |  |  |  |  |  |
| Pygl      |  |  |  |  |  |  |
| Pyhin1    |  |  |  |  |  |  |
| Rab11fip5 |  |  |  |  |  |  |
| Rab32     |  |  |  |  |  |  |
| Rab34     |  |  |  |  |  |  |
| Rab35     |  |  |  |  |  |  |
| Rab3gap2  |  |  |  |  |  |  |
| Rab44     |  |  |  |  |  |  |
| Rab4b     |  |  |  |  |  |  |
| Rabgef1   |  |  |  |  |  |  |
| Rac2      |  |  |  |  |  |  |
| Rad18     |  |  |  |  |  |  |
| Rad23b    |  |  |  |  |  |  |
| Rad54l2   |  |  |  |  |  |  |
| Ralb      |  |  |  |  |  |  |
| Ran       |  |  |  |  |  |  |
| Ranbp1    |  |  |  |  |  |  |
| Rapgef1   |  |  |  |  |  |  |
| Raph1     |  |  |  |  |  |  |
| Rara      |  |  |  |  |  |  |
| Rarres2   |  |  |  |  |  |  |
| Rars      |  |  |  |  |  |  |
| Rasip1    |  |  |  |  |  |  |
| Rasl1b    |  |  |  |  |  |  |
| Rassf1    |  |  |  |  |  |  |
| Rassf4    |  |  |  |  |  |  |
| Rassf5    |  |  |  |  |  |  |
| Rassf7    |  |  |  |  |  |  |
| Rbm19     |  |  |  |  |  |  |
| Rbm34     |  |  |  |  |  |  |
| Rbm47     |  |  |  |  |  |  |
| Rbms1     |  |  |  |  |  |  |
| Rbmx2     |  |  |  |  |  |  |
| Rbmxrt    |  |  |  |  |  |  |
| Rbp7      |  |  |  |  |  |  |
| Rbpj      |  |  |  |  |  |  |
| Rbpms     |  |  |  |  |  |  |
| Rcc1      |  |  |  |  |  |  |
| Rcc2      |  |  |  |  |  |  |
| Rcl1      |  |  |  |  |  |  |
| Rdh10     |  |  |  |  |  |  |
| Rdh11     |  |  |  |  |  |  |

|         |  |  |  |  |  |  |
|---------|--|--|--|--|--|--|
| Rdh12   |  |  |  |  |  |  |
| Rdh9    |  |  |  |  |  |  |
| Reep3   |  |  |  |  |  |  |
| Relb    |  |  |  |  |  |  |
| Rell1   |  |  |  |  |  |  |
| Relt    |  |  |  |  |  |  |
| Retnlg  |  |  |  |  |  |  |
| Rfc3    |  |  |  |  |  |  |
| Rgnef   |  |  |  |  |  |  |
| Rgs11   |  |  |  |  |  |  |
| Rgs12   |  |  |  |  |  |  |
| Rgs16   |  |  |  |  |  |  |
| Rgs18   |  |  |  |  |  |  |
| Rgs19   |  |  |  |  |  |  |
| Rhbdd1  |  |  |  |  |  |  |
| Rhbdf2  |  |  |  |  |  |  |
| Rhod    |  |  |  |  |  |  |
| Ric8    |  |  |  |  |  |  |
| Rin1    |  |  |  |  |  |  |
| Riok1   |  |  |  |  |  |  |
| Riok3   |  |  |  |  |  |  |
| Ripk2   |  |  |  |  |  |  |
| Ripk3   |  |  |  |  |  |  |
| Rlim    |  |  |  |  |  |  |
| Rnaseh1 |  |  |  |  |  |  |
| Rnd1    |  |  |  |  |  |  |
| Rnf103  |  |  |  |  |  |  |
| Rnf125  |  |  |  |  |  |  |
| Rnf126  |  |  |  |  |  |  |
| Rnf149  |  |  |  |  |  |  |
| Rnf160  |  |  |  |  |  |  |
| Rnf19a  |  |  |  |  |  |  |
| Rnf19b  |  |  |  |  |  |  |
| Rnf39   |  |  |  |  |  |  |
| Rnf4    |  |  |  |  |  |  |
| Rnf41   |  |  |  |  |  |  |
| Rnh1    |  |  |  |  |  |  |
| Rnmt    |  |  |  |  |  |  |
| Rnps1   |  |  |  |  |  |  |
| Rnu3b1  |  |  |  |  |  |  |
| Ror1    |  |  |  |  |  |  |
| Rpl12   |  |  |  |  |  |  |
| Rpl13   |  |  |  |  |  |  |
| Rpl14   |  |  |  |  |  |  |
| Rpl17   |  |  |  |  |  |  |
| Rpl23   |  |  |  |  |  |  |
| Rpl27   |  |  |  |  |  |  |
| Rpl27a  |  |  |  |  |  |  |
| Rpl30   |  |  |  |  |  |  |
| Rpl34   |  |  |  |  |  |  |
| Rpl36a  |  |  |  |  |  |  |
| Rpl36al |  |  |  |  |  |  |
| Rpl37   |  |  |  |  |  |  |
| Rpl7    |  |  |  |  |  |  |
| Rpl711  |  |  |  |  |  |  |
| Rpn1    |  |  |  |  |  |  |
| Rps12   |  |  |  |  |  |  |
| Rps15a  |  |  |  |  |  |  |
| Rps18   |  |  |  |  |  |  |
| Rps19   |  |  |  |  |  |  |
| Rps25   |  |  |  |  |  |  |
| Rps27a  |  |  |  |  |  |  |
| Rps6    |  |  |  |  |  |  |
| Rps6ka1 |  |  |  |  |  |  |
| Rps6ka3 |  |  |  |  |  |  |
| Rps6ka4 |  |  |  |  |  |  |
| Rraga   |  |  |  |  |  |  |
| Rras    |  |  |  |  |  |  |
| Rras2   |  |  |  |  |  |  |

|           |  |  |  |  |  |  |
|-----------|--|--|--|--|--|--|
| Rrbp1     |  |  |  |  |  |  |
| Rrp15     |  |  |  |  |  |  |
| Rrp1b     |  |  |  |  |  |  |
| Rrp8      |  |  |  |  |  |  |
| Rtn4      |  |  |  |  |  |  |
| Rtn4rl2   |  |  |  |  |  |  |
| Runx2     |  |  |  |  |  |  |
| Rusc2     |  |  |  |  |  |  |
| Ruvbl1    |  |  |  |  |  |  |
| Rxfp3     |  |  |  |  |  |  |
| S100a10   |  |  |  |  |  |  |
| S100a16   |  |  |  |  |  |  |
| S100a4    |  |  |  |  |  |  |
| S100a6    |  |  |  |  |  |  |
| S100a8    |  |  |  |  |  |  |
| S100a9    |  |  |  |  |  |  |
| S1pr1     |  |  |  |  |  |  |
| Saa3      |  |  |  |  |  |  |
| Sacs      |  |  |  |  |  |  |
| Samsn1    |  |  |  |  |  |  |
| Sap30     |  |  |  |  |  |  |
| Sars      |  |  |  |  |  |  |
| Sat1      |  |  |  |  |  |  |
| Sav1      |  |  |  |  |  |  |
| Sc4mol    |  |  |  |  |  |  |
| Scn5a     |  |  |  |  |  |  |
| Scyl2     |  |  |  |  |  |  |
| Scyl3     |  |  |  |  |  |  |
| Sdad1     |  |  |  |  |  |  |
| Sdc1      |  |  |  |  |  |  |
| Sdcbp     |  |  |  |  |  |  |
| Sdcbp2    |  |  |  |  |  |  |
| Sdk2      |  |  |  |  |  |  |
| Sebox     |  |  |  |  |  |  |
| Sec23b    |  |  |  |  |  |  |
| Sec24a    |  |  |  |  |  |  |
| Sec24b    |  |  |  |  |  |  |
| Seh1l     |  |  |  |  |  |  |
| Sell      |  |  |  |  |  |  |
| Selp      |  |  |  |  |  |  |
| Selplg    |  |  |  |  |  |  |
| Sema3a    |  |  |  |  |  |  |
| Sema4a    |  |  |  |  |  |  |
| Senp5     |  |  |  |  |  |  |
| Serinc2   |  |  |  |  |  |  |
| Serpina3m |  |  |  |  |  |  |
| Serpinb2  |  |  |  |  |  |  |
| Sertad1   |  |  |  |  |  |  |
| Sertad2   |  |  |  |  |  |  |
| Sertad3   |  |  |  |  |  |  |
| Sesn2     |  |  |  |  |  |  |
| Set       |  |  |  |  |  |  |
| Setd1a    |  |  |  |  |  |  |
| Setd5     |  |  |  |  |  |  |
| Sf3b4     |  |  |  |  |  |  |
| Sfpi1     |  |  |  |  |  |  |
| Sfrs9     |  |  |  |  |  |  |
| Sft2d1    |  |  |  |  |  |  |
| Sfxn1     |  |  |  |  |  |  |
| Sfxn5     |  |  |  |  |  |  |
| Sgpl1     |  |  |  |  |  |  |
| Sgtb      |  |  |  |  |  |  |
| Sh2b2     |  |  |  |  |  |  |
| Sh2d5     |  |  |  |  |  |  |
| Sh3bgrl2  |  |  |  |  |  |  |
| Sh3bgrl3  |  |  |  |  |  |  |
| Sh3pxd2b  |  |  |  |  |  |  |
| Shb       |  |  |  |  |  |  |
| Shc1      |  |  |  |  |  |  |

|          |  |  |  |  |  |  |
|----------|--|--|--|--|--|--|
| Shebp1   |  |  |  |  |  |  |
| She      |  |  |  |  |  |  |
| Shisa5   |  |  |  |  |  |  |
| Shkbp1   |  |  |  |  |  |  |
| Shoc2    |  |  |  |  |  |  |
| Shq1     |  |  |  |  |  |  |
| Shroom2  |  |  |  |  |  |  |
| Shroom3  |  |  |  |  |  |  |
| Siah1a   |  |  |  |  |  |  |
| Siglec1  |  |  |  |  |  |  |
| Siglece  |  |  |  |  |  |  |
| Sigmar1  |  |  |  |  |  |  |
| Sipa113  |  |  |  |  |  |  |
| Sirpb1   |  |  |  |  |  |  |
| Skap2    |  |  |  |  |  |  |
| Sla      |  |  |  |  |  |  |
| Slc10a3  |  |  |  |  |  |  |
| Slc10a7  |  |  |  |  |  |  |
| Slc11a1  |  |  |  |  |  |  |
| Slc12a4  |  |  |  |  |  |  |
| Slc15a3  |  |  |  |  |  |  |
| Slc16a3  |  |  |  |  |  |  |
| Slc19a1  |  |  |  |  |  |  |
| Slc1a1   |  |  |  |  |  |  |
| Slc1a4   |  |  |  |  |  |  |
| Slc22a15 |  |  |  |  |  |  |
| Slc23a2  |  |  |  |  |  |  |
| Slc25a1  |  |  |  |  |  |  |
| Slc25a17 |  |  |  |  |  |  |
| Slc25a37 |  |  |  |  |  |  |
| Slc2a1   |  |  |  |  |  |  |
| Slc2a3   |  |  |  |  |  |  |
| Slc30a4  |  |  |  |  |  |  |
| Slc30a7  |  |  |  |  |  |  |
| Slc35b1  |  |  |  |  |  |  |
| Slc35b3  |  |  |  |  |  |  |
| Slc35b4  |  |  |  |  |  |  |
| Slc35d2  |  |  |  |  |  |  |
| Slc35e4  |  |  |  |  |  |  |
| Slc36a4  |  |  |  |  |  |  |
| Slc38a1  |  |  |  |  |  |  |
| Slc39a11 |  |  |  |  |  |  |
| Slc39a13 |  |  |  |  |  |  |
| Slc39a14 |  |  |  |  |  |  |
| Slc39a7  |  |  |  |  |  |  |
| Slc3a2   |  |  |  |  |  |  |
| Slc43a2  |  |  |  |  |  |  |
| Slc45a3  |  |  |  |  |  |  |
| Slc4a1   |  |  |  |  |  |  |
| Slc6a12  |  |  |  |  |  |  |
| Slc6a9   |  |  |  |  |  |  |
| Slc7a11  |  |  |  |  |  |  |
| Slc7a2   |  |  |  |  |  |  |
| Slc7a5   |  |  |  |  |  |  |
| Slc9a3r1 |  |  |  |  |  |  |
| Slc9a7   |  |  |  |  |  |  |
| Slco2a1  |  |  |  |  |  |  |
| Slco4a1  |  |  |  |  |  |  |
| Slfn1    |  |  |  |  |  |  |
| Slfn10   |  |  |  |  |  |  |
| Slfn4    |  |  |  |  |  |  |
| Slpi     |  |  |  |  |  |  |
| Smad7    |  |  |  |  |  |  |
| Smap1    |  |  |  |  |  |  |
| Smarcb1  |  |  |  |  |  |  |
| Smg1     |  |  |  |  |  |  |
| Smg7     |  |  |  |  |  |  |
| Smn1     |  |  |  |  |  |  |
| Smpd13b  |  |  |  |  |  |  |

|          |  |  |  |  |  |  |
|----------|--|--|--|--|--|--|
| Smurf1   |  |  |  |  |  |  |
| Smyd5    |  |  |  |  |  |  |
| Snai1    |  |  |  |  |  |  |
| Snca     |  |  |  |  |  |  |
| Snhg1    |  |  |  |  |  |  |
| Snora61  |  |  |  |  |  |  |
| Snora62  |  |  |  |  |  |  |
| Snora65  |  |  |  |  |  |  |
| Snora70  |  |  |  |  |  |  |
| Snora7a  |  |  |  |  |  |  |
| Snord115 |  |  |  |  |  |  |
| Snord116 |  |  |  |  |  |  |
| Snord34  |  |  |  |  |  |  |
| Snord49a |  |  |  |  |  |  |
| Snord53  |  |  |  |  |  |  |
| Snord96a |  |  |  |  |  |  |
| Snrpa1   |  |  |  |  |  |  |
| Snrpd1   |  |  |  |  |  |  |
| Snx1     |  |  |  |  |  |  |
| Snx10    |  |  |  |  |  |  |
| Snx18    |  |  |  |  |  |  |
| Snx24    |  |  |  |  |  |  |
| Snx7     |  |  |  |  |  |  |
| Snx9     |  |  |  |  |  |  |
| Soat2    |  |  |  |  |  |  |
| Socs3    |  |  |  |  |  |  |
| Sorbs2   |  |  |  |  |  |  |
| Spata13  |  |  |  |  |  |  |
| Spatc1   |  |  |  |  |  |  |
| Spcs3    |  |  |  |  |  |  |
| Spg21    |  |  |  |  |  |  |
| Sphk1    |  |  |  |  |  |  |
| Spint1   |  |  |  |  |  |  |
| Spp1     |  |  |  |  |  |  |
| Spred3   |  |  |  |  |  |  |
| Spr2a    |  |  |  |  |  |  |
| Spry2    |  |  |  |  |  |  |
| Spryd3   |  |  |  |  |  |  |
| Sqle     |  |  |  |  |  |  |
| Src      |  |  |  |  |  |  |
| Sreb2    |  |  |  |  |  |  |
| Srgap1   |  |  |  |  |  |  |
| Srgap3   |  |  |  |  |  |  |
| Srgn     |  |  |  |  |  |  |
| Sri      |  |  |  |  |  |  |
| Srxn1    |  |  |  |  |  |  |
| Ssb      |  |  |  |  |  |  |
| Ssh1     |  |  |  |  |  |  |
| Ssr1     |  |  |  |  |  |  |
| Ssr2     |  |  |  |  |  |  |
| Ssrp1    |  |  |  |  |  |  |
| Stam     |  |  |  |  |  |  |
| Star     |  |  |  |  |  |  |
| Stat3    |  |  |  |  |  |  |
| Steap1   |  |  |  |  |  |  |
| Steap2   |  |  |  |  |  |  |
| Stfa211  |  |  |  |  |  |  |
| Stk3     |  |  |  |  |  |  |
| Stk4     |  |  |  |  |  |  |
| Stk40    |  |  |  |  |  |  |
| Strm     |  |  |  |  |  |  |
| Strn     |  |  |  |  |  |  |
| Strn4    |  |  |  |  |  |  |
| Stt3a    |  |  |  |  |  |  |
| Stx12    |  |  |  |  |  |  |
| Stxbp1   |  |  |  |  |  |  |
| Stxbp2   |  |  |  |  |  |  |
| Supt6h   |  |  |  |  |  |  |
| Surf4    |  |  |  |  |  |  |

|          |  |  |  |  |  |  |
|----------|--|--|--|--|--|--|
| Sv2b     |  |  |  |  |  |  |
| Syk      |  |  |  |  |  |  |
| Syncrip  |  |  |  |  |  |  |
| Synj1    |  |  |  |  |  |  |
| Taf1d    |  |  |  |  |  |  |
| Taf4b    |  |  |  |  |  |  |
| Taf9     |  |  |  |  |  |  |
| Tal2     |  |  |  |  |  |  |
| Taldo1   |  |  |  |  |  |  |
| Tapt1    |  |  |  |  |  |  |
| Tardbp   |  |  |  |  |  |  |
| Tars     |  |  |  |  |  |  |
| Tas2r126 |  |  |  |  |  |  |
| Tas2r135 |  |  |  |  |  |  |
| Tas2r143 |  |  |  |  |  |  |
| Tatdn2   |  |  |  |  |  |  |
| Tbc1d1   |  |  |  |  |  |  |
| Tbc1d10b |  |  |  |  |  |  |
| Tbc1d15  |  |  |  |  |  |  |
| Tbc1d9   |  |  |  |  |  |  |
| Tbcd     |  |  |  |  |  |  |
| Tbk1     |  |  |  |  |  |  |
| Tbl1xr1  |  |  |  |  |  |  |
| Tbl2     |  |  |  |  |  |  |
| Tbl3     |  |  |  |  |  |  |
| Tbrg1    |  |  |  |  |  |  |
| Tbrg3    |  |  |  |  |  |  |
| Tcerg1   |  |  |  |  |  |  |
| Tcfec    |  |  |  |  |  |  |
| Tdg      |  |  |  |  |  |  |
| Tead2    |  |  |  |  |  |  |
| Tead4    |  |  |  |  |  |  |
| Tes      |  |  |  |  |  |  |
| Tex10    |  |  |  |  |  |  |
| Tfpi2    |  |  |  |  |  |  |
| Tgfb1i1  |  |  |  |  |  |  |
| Tgfb1    |  |  |  |  |  |  |
| Tgm1     |  |  |  |  |  |  |
| Thoc4    |  |  |  |  |  |  |
| Thumpd3  |  |  |  |  |  |  |
| Tiam2    |  |  |  |  |  |  |
| Tifa     |  |  |  |  |  |  |
| Tigd2    |  |  |  |  |  |  |
| Tinag1l  |  |  |  |  |  |  |
| Tipin    |  |  |  |  |  |  |
| Tjap1    |  |  |  |  |  |  |
| Tjp2     |  |  |  |  |  |  |
| Tkt      |  |  |  |  |  |  |
| Tll1     |  |  |  |  |  |  |
| Tln1     |  |  |  |  |  |  |
| Tlr13    |  |  |  |  |  |  |
| Tm4sf19  |  |  |  |  |  |  |
| Tmbim1   |  |  |  |  |  |  |
| Tmed5    |  |  |  |  |  |  |
| Tmed9    |  |  |  |  |  |  |
| Tmem120a |  |  |  |  |  |  |
| Tmem128  |  |  |  |  |  |  |
| Tmem154  |  |  |  |  |  |  |
| Tmem165  |  |  |  |  |  |  |
| Tmem167  |  |  |  |  |  |  |
| Tmem168  |  |  |  |  |  |  |
| Tmem183a |  |  |  |  |  |  |
| Tmem184b |  |  |  |  |  |  |
| Tmem189  |  |  |  |  |  |  |
| Tmem202  |  |  |  |  |  |  |
| Tmem214  |  |  |  |  |  |  |
| Tmem22   |  |  |  |  |  |  |
| Tmem39a  |  |  |  |  |  |  |
| Tmem43   |  |  |  |  |  |  |

|           |  |  |  |  |  |  |
|-----------|--|--|--|--|--|--|
| Tmem49    |  |  |  |  |  |  |
| Tmem87b   |  |  |  |  |  |  |
| Tnc       |  |  |  |  |  |  |
| Tnfaip1   |  |  |  |  |  |  |
| Tnfaip3   |  |  |  |  |  |  |
| Tnfaip6   |  |  |  |  |  |  |
| Tnfaip812 |  |  |  |  |  |  |
| Tnfrsf10b |  |  |  |  |  |  |
| Tnfrsf1b  |  |  |  |  |  |  |
| Tnfrsf22  |  |  |  |  |  |  |
| Tnfrsf23  |  |  |  |  |  |  |
| Tnfrsf26  |  |  |  |  |  |  |
| Tnfrsf9   |  |  |  |  |  |  |
| Tnfsf9    |  |  |  |  |  |  |
| Tnpo2     |  |  |  |  |  |  |
| Tomm20    |  |  |  |  |  |  |
| Tomm70a   |  |  |  |  |  |  |
| Topbp1    |  |  |  |  |  |  |
| Tpbg      |  |  |  |  |  |  |
| Tpcn2     |  |  |  |  |  |  |
| Tpd52     |  |  |  |  |  |  |
| Tpp2      |  |  |  |  |  |  |
| Tpt1      |  |  |  |  |  |  |
| Tra2b     |  |  |  |  |  |  |
| Traf3     |  |  |  |  |  |  |
| Traf6     |  |  |  |  |  |  |
| Traf7     |  |  |  |  |  |  |
| Tram1     |  |  |  |  |  |  |
| Tram2     |  |  |  |  |  |  |
| Trappc5   |  |  |  |  |  |  |
| Trem1     |  |  |  |  |  |  |
| Trem2     |  |  |  |  |  |  |
| Trib3     |  |  |  |  |  |  |
| Trim27    |  |  |  |  |  |  |
| Trim41    |  |  |  |  |  |  |
| Trip13    |  |  |  |  |  |  |
| Trmt6     |  |  |  |  |  |  |
| Trmt61a   |  |  |  |  |  |  |
| Trove2    |  |  |  |  |  |  |
| Trp53     |  |  |  |  |  |  |
| Trp53i11  |  |  |  |  |  |  |
| Trp53i13  |  |  |  |  |  |  |
| Trpc6     |  |  |  |  |  |  |
| Trpm2     |  |  |  |  |  |  |
| Trpv2     |  |  |  |  |  |  |
| Tsc22d2   |  |  |  |  |  |  |
| Tshz1     |  |  |  |  |  |  |
| Tsku      |  |  |  |  |  |  |
| Tspan5    |  |  |  |  |  |  |
| Tsr1      |  |  |  |  |  |  |
| Tsse4     |  |  |  |  |  |  |
| Ttc37     |  |  |  |  |  |  |
| Ttc9      |  |  |  |  |  |  |
| Ttll1     |  |  |  |  |  |  |
| Tuba1c    |  |  |  |  |  |  |
| Tubb1     |  |  |  |  |  |  |
| Tuft1     |  |  |  |  |  |  |
| Tulp4     |  |  |  |  |  |  |
| Twist1    |  |  |  |  |  |  |
| Twistnb   |  |  |  |  |  |  |
| Txlna     |  |  |  |  |  |  |
| Txn1      |  |  |  |  |  |  |
| Txndc11   |  |  |  |  |  |  |
| Txndc5    |  |  |  |  |  |  |
| Txnrd1    |  |  |  |  |  |  |
| U2af1     |  |  |  |  |  |  |
| Uba2      |  |  |  |  |  |  |
| Ubash3b   |  |  |  |  |  |  |
| Ube2e2    |  |  |  |  |  |  |

|           |  |  |  |  |  |  |
|-----------|--|--|--|--|--|--|
| Ube2j1    |  |  |  |  |  |  |
| Ube2o     |  |  |  |  |  |  |
| Ube2z     |  |  |  |  |  |  |
| Ubqln1    |  |  |  |  |  |  |
| Ubxn4     |  |  |  |  |  |  |
| Ucp2      |  |  |  |  |  |  |
| Ufm1      |  |  |  |  |  |  |
| Ugcgl2    |  |  |  |  |  |  |
| Ugt1a9    |  |  |  |  |  |  |
| Uhrf1     |  |  |  |  |  |  |
| Uhrf1bp11 |  |  |  |  |  |  |
| Unc5b     |  |  |  |  |  |  |
| Urb1      |  |  |  |  |  |  |
| Urb2      |  |  |  |  |  |  |
| Uso1      |  |  |  |  |  |  |
| Usp1      |  |  |  |  |  |  |
| Usp20     |  |  |  |  |  |  |
| Usp22     |  |  |  |  |  |  |
| Usp31     |  |  |  |  |  |  |
| Usp39     |  |  |  |  |  |  |
| Usp47     |  |  |  |  |  |  |
| Usp53     |  |  |  |  |  |  |
| Usp6nl    |  |  |  |  |  |  |
| Usp7      |  |  |  |  |  |  |
| Usp11     |  |  |  |  |  |  |
| Utp14a    |  |  |  |  |  |  |
| Utp15     |  |  |  |  |  |  |
| Utp18     |  |  |  |  |  |  |
| Utp20     |  |  |  |  |  |  |
| Uxs1      |  |  |  |  |  |  |
| Vars      |  |  |  |  |  |  |
| Vasp      |  |  |  |  |  |  |
| Vav1      |  |  |  |  |  |  |
| Vcl       |  |  |  |  |  |  |
| Vmn2r9    |  |  |  |  |  |  |
| Vps37b    |  |  |  |  |  |  |
| Vps4b     |  |  |  |  |  |  |
| Wasf2     |  |  |  |  |  |  |
| Wdfy1     |  |  |  |  |  |  |
| Wdhd1     |  |  |  |  |  |  |
| Wdr1      |  |  |  |  |  |  |
| Wdr12     |  |  |  |  |  |  |
| Wdr26     |  |  |  |  |  |  |
| Wdr3      |  |  |  |  |  |  |
| Wdr4      |  |  |  |  |  |  |
| Wdr43     |  |  |  |  |  |  |
| Wdr45l    |  |  |  |  |  |  |
| Wdr46     |  |  |  |  |  |  |
| Wdr62     |  |  |  |  |  |  |
| Wdr70     |  |  |  |  |  |  |
| Wdr73     |  |  |  |  |  |  |
| Wdr74     |  |  |  |  |  |  |
| Wdr75     |  |  |  |  |  |  |
| Wdr77     |  |  |  |  |  |  |
| Wdsof1    |  |  |  |  |  |  |
| Whamm     |  |  |  |  |  |  |
| Whsc1     |  |  |  |  |  |  |
| Wipf1     |  |  |  |  |  |  |
| Wnt9a     |  |  |  |  |  |  |
| Wwc2      |  |  |  |  |  |  |
| Xbp1      |  |  |  |  |  |  |
| Xirp2     |  |  |  |  |  |  |
| Xpnpep1   |  |  |  |  |  |  |
| Xpo6      |  |  |  |  |  |  |
| Xpot      |  |  |  |  |  |  |
| Xylt1     |  |  |  |  |  |  |
| Yars      |  |  |  |  |  |  |
| Yipf5     |  |  |  |  |  |  |
| Ykt6      |  |  |  |  |  |  |



|            |  |  |  |  |  |  |
|------------|--|--|--|--|--|--|
| Ypel5      |  |  |  |  |  |  |
| Yrdc       |  |  |  |  |  |  |
| Ythdf2     |  |  |  |  |  |  |
| Ywhab      |  |  |  |  |  |  |
| Ywhag      |  |  |  |  |  |  |
| Ywhah      |  |  |  |  |  |  |
| Ywhaz      |  |  |  |  |  |  |
| Zbp1       |  |  |  |  |  |  |
| Zbtb22     |  |  |  |  |  |  |
| Zc3h12d    |  |  |  |  |  |  |
| Zc3h7a     |  |  |  |  |  |  |
| Zcche9     |  |  |  |  |  |  |
| Zdhhc12    |  |  |  |  |  |  |
| Zdhhc21    |  |  |  |  |  |  |
| Zdhhc9     |  |  |  |  |  |  |
| Zfp120     |  |  |  |  |  |  |
| Zfp13      |  |  |  |  |  |  |
| Zfp408     |  |  |  |  |  |  |
| Zfp52      |  |  |  |  |  |  |
| Zfp593     |  |  |  |  |  |  |
| Zfp9       |  |  |  |  |  |  |
| Zfr        |  |  |  |  |  |  |
| Zmat3      |  |  |  |  |  |  |
| Zmiz1      |  |  |  |  |  |  |
| Zmynd19    |  |  |  |  |  |  |
| Znrf2      |  |  |  |  |  |  |
| Zscan4-ps2 |  |  |  |  |  |  |
| Zswim4     |  |  |  |  |  |  |
| Zwilch     |  |  |  |  |  |  |
| Zwint      |  |  |  |  |  |  |
| Zzefl      |  |  |  |  |  |  |

2  
3  
4  
5  
6  
7  
8  
9  
10  
11  
12  
13  
14  
15  
16  
17  
18  
19  
20  
21  
22  
23  
24  
25  
26  
27  
28

Table S2: Down-regulated genes in all time points post MI.

| Uniquely down-regulated 2 days post-MI | Uniquely down-regulated 2 weeks post-MI | Uniquely down-regulated 2 months post-MI | Commonly down-regulated in 2 days and 2 weeks | Commonly down-regulated in 2 days and 2 months | Commonly down-regulated in 2 weeks and 2 months | Commonly down-regulated in all time points |
|----------------------------------------|-----------------------------------------|------------------------------------------|-----------------------------------------------|------------------------------------------------|-------------------------------------------------|--------------------------------------------|
| Aadacl1                                | ATP6                                    | Abcd2                                    | Abcb10                                        | Abhd14b                                        | Ankrd33b                                        | A2bp1                                      |
| Aars2                                  | Abcb9                                   | Abhd6                                    | Abcb6                                         | Adam11                                         | Cited2                                          | AI314976                                   |
| Aarsd1                                 | Abcf2                                   | Acn9                                     | Abcc8                                         | Adamts7                                        | Eny2                                            | Aasdh                                      |
| Aasdhppt                               | Acot7                                   | Adam23                                   | Abhd11                                        | Agtpbp1                                        | Kcna1                                           | Ahr                                        |
| Abca1                                  | Actl6a                                  | Aldh9a1                                  | Ablim2                                        | Ano5                                           | Slc20a2                                         | Aigl                                       |
| Abca12                                 | Acy1                                    | Amotl2                                   | Acaa2                                         | Aqp7                                           | Slc9a2                                          | Akt1s1                                     |
| Abca2                                  | Adamts15                                | Arhgap28                                 | Acad10                                        | Arhgef3                                        | Tbc1d24                                         | Aldob                                      |
| Abca6                                  | Ak311                                   | Arl9                                     | Acp6                                          | Cadm4                                          | Tmem220                                         | Amy1                                       |
| Abca8a                                 | Alb                                     | Bcar3                                    | Acsf3                                         | Camk2a                                         |                                                 | Asb15                                      |
| Abca8b                                 | Atg16l1                                 | Bcl2l11                                  | Acsm5                                         | Cc2d2a                                         |                                                 | Aspa                                       |
| Abca9                                  | Atp6v0a2                                | Cartpt                                   | Acyp2                                         | Cd200                                          |                                                 | Bmper                                      |
| Abcb4                                  | B4gal3                                  | Ccdc3                                    | Adck1                                         | Cdh19                                          |                                                 | Cpox                                       |
| Abcb7                                  | BC003266                                | Ccng2                                    | Adi1                                          | Cdh4                                           |                                                 | Cth                                        |
| Abcb8                                  | Bcl2l13                                 | Cd274                                    | Adra1b                                        | Cdkn1b                                         |                                                 | Dennd4b                                    |
| Abcc5                                  | Brp16                                   | Celsr2                                   | Adrb1                                         | Ces3                                           |                                                 | Egf                                        |
| Abcc9                                  | C85492                                  | Clen3                                    | Adsl                                          | Chac2                                          |                                                 | Enpp2                                      |
| Abcd1                                  | C8g                                     | Cnn1                                     | Agpat3                                        | Clen1                                          |                                                 | Epdr1                                      |
| Abhd10                                 | Cacna1s                                 | Ctdsp2                                   | Ahsa1                                         | Cln6                                           |                                                 | Epha4                                      |
| Abhd12                                 | Ccdc101                                 | Cxcl12                                   | Aifm1                                         | Cmtm8                                          |                                                 | Fdft1                                      |
| Abhd14a                                | Cct7                                    | Cxcl13                                   | Akr7a5                                        | Ctage5                                         |                                                 | Fn3k                                       |
| Abhd3                                  | Ciapin1                                 | Cybrd1                                   | Alad                                          | Ddx60                                          |                                                 | Gcat                                       |
| Abhd8                                  | Clec12b                                 | Defb46                                   | Alkbh7                                        | Dgke                                           |                                                 | Gfra1                                      |
| Ablim1                                 | Cntfr                                   | Dmxl2                                    | Amacr                                         | Dhdh                                           |                                                 | Gfra3                                      |
| Ablim3                                 | Cwcl5                                   | Edn1                                     | Amy2a1                                        | Dhtkd1                                         |                                                 | Ggnbp1                                     |
| Abtb1                                  | Cxcl14                                  | Eef2k                                    | Amy2a5                                        | Dnaje12                                        |                                                 | Kcnd2                                      |
| Acaal1a                                | Cyp26b1                                 | Fcho2                                    | Anapc13                                       | Efemp1                                         |                                                 | Kcnj3                                      |
| Acacb                                  | Dct                                     | Fhod1                                    | Angptl1                                       | Eif2c4                                         |                                                 | Klhdc6                                     |
| Acad11                                 | Denr                                    | Fut10                                    | Ano4                                          | Fam102a                                        |                                                 | Klhl38                                     |
| Acad8                                  | Diap3                                   | Gk5                                      | Anp32a                                        | Fam13c                                         |                                                 | Lmod3                                      |
| Acad9                                  | Dlx6                                    | Gng5                                     | Anxa11                                        | Fbxo10                                         |                                                 | Lrrc61                                     |
| Acadl                                  | Dnajb9                                  | Gpr21                                    | Ap3s2                                         | Gbp5                                           |                                                 | Lsm14b                                     |
| Acadm                                  | Dtx1                                    | Hamp2                                    | Apool                                         | Gpr155                                         |                                                 | Mblac2                                     |
| Acads                                  | Dub2                                    | Ihh                                      | Arl2                                          | Gstt2                                          |                                                 | Mettl7a1                                   |
| Acadsb                                 | Dub2a                                   | Insig1                                   | Arl3                                          | Hey2                                           |                                                 | Mlxipl                                     |
| Acadv1                                 | Dus2l                                   | Kcna6                                    | Armc2                                         | Idh1                                           |                                                 | Mme                                        |
| Acat1                                  | Dusp10                                  | Kdm6a                                    | Asb18                                         | Kcnj2                                          |                                                 | Mrgprh                                     |
| Aco2                                   | Dydc1                                   | Kpna2                                    | Asfla                                         | Kitl                                           |                                                 | Nampt                                      |
| Acot11                                 | Ebna1bp2                                | Krec1                                    | Atg4d                                         | Lama5                                          |                                                 | Olf1396                                    |
| Acot13                                 | Egln2                                   | Krt7                                     | Atp5f1                                        | Lin52                                          |                                                 | P2ry1                                      |
| Acrbp                                  | Eif1b                                   | Krt86                                    | Aurkaip1                                      | Lphn1                                          |                                                 | Pde11a                                     |
| Acs11                                  | Eif3m                                   | L1cam                                    | Aven                                          | Mamdc2                                         |                                                 | Pde4a                                      |
| Acs16                                  | Fam69a                                  | Lonrf1                                   | Bckdhh                                        | Map2k6                                         |                                                 | Penk                                       |
| Acss1                                  | Fiz1                                    | Lpcat3                                   | Bcl7a                                         | Mfhas1                                         |                                                 | Plp1                                       |
| Acss2                                  | Fkbp2                                   | Lrrn4                                    | Bola1                                         | Mrps35                                         |                                                 | Plxnb1                                     |
| Actr3b                                 | Fndc4                                   | Mdm4                                     | Btdb2                                         | Mrvil                                          |                                                 | Ppl                                        |
| Actr6                                  | Fosb                                    | Mix11                                    | Btdb6                                         | Mterfd2                                        |                                                 | Prodh                                      |
| Actr8                                  | Ftcd                                    | Mkl2                                     | Bzw2                                          | Mtl5                                           |                                                 | Pttgl                                      |
| Acvr2a                                 | Gar1                                    | Mylk                                     | Calr3                                         | Myet1                                          |                                                 | Rarb                                       |
| Acy3                                   | Gata3                                   | Nkain4                                   | Carkd                                         | Myo5c                                          |                                                 | Rgs7bp                                     |
| Acyp1                                  | Ggct                                    | Nlgn3                                    | Cars2                                         | Naprt1                                         |                                                 | Scn4b                                      |
| Adal                                   | Gigyf1                                  | Nme4                                     | Cbx7                                          | Nrn1                                           |                                                 | Siva1                                      |
| Adam4                                  | Git1                                    | Npc1                                     | Cby1                                          | Olf1558                                        |                                                 | Slc16a10                                   |
| Adamts10                               | Gsta2                                   | Npy1r                                    | Ccdc90b                                       | Osbp13                                         |                                                 | Slc22a3                                    |
| Adamts3                                | Gtf2h4                                  | Nr2f2                                    | Ccnh                                          | Pank1                                          |                                                 | Slc25a42                                   |
| Adamts5                                | Gtsf11                                  | Olf1416                                  | Cdc34                                         | Pddc1                                          |                                                 | Slc26a6                                    |
| Adecy5                                 | Hk2                                     | Olf1765                                  | Cecr5                                         | Pdgfa                                          |                                                 | Trdn                                       |
| Adecy6                                 | Hnrpd1                                  | Ovol3                                    | Chchd7                                        | Pkia                                           |                                                 | Ybx2                                       |
| Adecy9                                 | Ifrd2                                   | P2ry5                                    | Chure1                                        | Plekhl1                                        |                                                 |                                            |
| Add3                                   | Ints1                                   | Pigz                                     | Clpb                                          | Prickle1                                       |                                                 |                                            |
| Adh1                                   | Itga7                                   | Plb1                                     | Clpp                                          | Prr12                                          |                                                 |                                            |
| Adhfe1                                 | Jagn1                                   | Pramel4                                  | Coq3                                          | Prrg1                                          |                                                 |                                            |
| Adprhl1                                | Jmjd5                                   | Ptch1                                    | Coq4                                          | Rassf9                                         |                                                 |                                            |
| Adra1a                                 | Jph1                                    | Rarres1                                  | Coq7                                          | Rem1                                           |                                                 |                                            |

|         |          |          |          |          |  |  |
|---------|----------|----------|----------|----------|--|--|
| Aes     | Jph2     | Rdx      | Cox7c    | Rhbd13   |  |  |
| Aga     | Kbtbd5   | Rfxap    | Cpeb3    | Rit1     |  |  |
| Agl     | Klhl34   | Rhpn2    | Cpt2     | Rnf122   |  |  |
| Agpat1  | Klk1b11  | Ripk2    | Creg1    | Rnf139   |  |  |
| Agtr1a  | Krtap5-1 | Rpp25    | Ctf1     | Rps6ka5  |  |  |
| Ahdc1   | Krtap5-2 | Siglecg  | Cutc     | Runx1t1  |  |  |
| Ahsa2   | Kti12    | Slc22a13 | Cux2     | Slc17a5  |  |  |
| Ak1     | Las11    | Slc6a9   | Cyb5d2   | Slc25a35 |  |  |
| Ak3     | Lrrn2    | Slitrk6  | Cyp2u1   | Slc38a6  |  |  |
| Akap1   | Lypla2   | Smarcd1  | Dand5    | Slc40a1  |  |  |
| Akap6   | Lym4     | Tigd2    | Dap3     | Slc46a3  |  |  |
| Akap7   | Magea10  | Tmem170  | Dcun1d2  | Taf1d    |  |  |
| Akap8l  | Map6d1   | Tmem8    | Ddrgk1   | Tet1     |  |  |
| Akr1b3  | Mapk14   | Tspan15  | Dhcr7    | Thap2    |  |  |
| Akr1c14 | Mef2d    | Wnt2b    | Dhrs4    | Tmco7    |  |  |
| Akr1e1  | Meis1    | Xlr4c    | Dip2c    | Tmem86a  |  |  |
| Akt2    | Metl14   | Zbtb37   | Dnaja3   | Tnfsf10  |  |  |
| Aktip   | Mknk2    | Zc3h6    | Dnajb2   | Tnik     |  |  |
| Alas1   | Mlycd    | Zfp109   | Dnajc28  | Tst      |  |  |
| Aldh2   | Mmadhc   | Zfp395   | Dynll2   | Wnt5a    |  |  |
| Aldh4a1 | Mrpl50   | Zfp607   | Eef1a2   | Zbtb44   |  |  |
| Aldh5a1 | ND6      | Zfp608   | Efnb3    |          |  |  |
| Aldh6a1 | Ncln     |          | Efr3b    |          |  |  |
| Aldh7a1 | Neu3     |          | Egln1    |          |  |  |
| Alg6    | Neurl4   |          | Eif4e3   |          |  |  |
| Alox5   | Nfe2l1   |          | Entpd6   |          |  |  |
| Alpk2   | Nmd3     |          | Eral1    |          |  |  |
| Alpk3   | Nol11    |          | Erb3     |          |  |  |
| Amd1    | Npm3     |          | Erc1     |          |  |  |
| Amigo1  | Nt5dc3   |          | Esrra    |          |  |  |
| Amz2    | Nt5m     |          | Esrrg    |          |  |  |
| Anapc5  | Olfrl166 |          | Extl1    |          |  |  |
| Angpt1  | Olfrl419 |          | Fam116b  |          |  |  |
| Angptl3 | Pctp     |          | Farp2    |          |  |  |
| Ank     | Pcyt1a   |          | Fem1a    |          |  |  |
| Ank2    | Pelp1    |          | Fitm2    |          |  |  |
| Ankmy2  | Pgp      |          | Fkbp4    |          |  |  |
| Ankrd12 | Pin4     |          | Flad1    |          |  |  |
| Ankrd29 | Plekhb1  |          | Flcn     |          |  |  |
| Ankrd32 | Plekhj1  |          | Foxo4    |          |  |  |
| Ankrd40 | Pnck     |          | Fto      |          |  |  |
| Anks1   | Polr3g   |          | Fuz      |          |  |  |
| Ankzf1  | Ppa1     |          | Fxn      |          |  |  |
| Ano1    | Ppapdc2  |          | Gal3st3  |          |  |  |
| Ano8    | Ppp2r5b  |          | Galm     |          |  |  |
| Antxr2  | Prdx1    |          | Garnl4   |          |  |  |
| Aof1    | Preb     |          | Gga2     |          |  |  |
| Aox1    | Prkag3   |          | Ggt5     |          |  |  |
| Ap4m1   | Prkez    |          | Gjb4     |          |  |  |
| Ap4s1   | Psemb3   |          | Gm889    |          |  |  |
| Apba3   | Psemb5   |          | Gpr157   |          |  |  |
| Apbb1   | Psmg2    |          | Gpt      |          |  |  |
| Apeh    | Rdh19    |          | Grec10   |          |  |  |
| Apex2   | Ret      |          | Grip2    |          |  |  |
| Apip    | Rgs7     |          | Gtpbp5   |          |  |  |
| Aplnr   | Rhox1    |          | H2-Ke2   |          |  |  |
| Aplp2   | Rnd2     |          | Hdac11   |          |  |  |
| Apoa1bp | Rnf113a2 |          | Hmcn1    |          |  |  |
| Apobec2 | Rnf7     |          | Hnrnp3   |          |  |  |
| Apoe    | Rps8     |          | Hrc      |          |  |  |
| Apol10b | Scara5   |          | Hsd17b10 |          |  |  |
| Apoo-ps | Scye1    |          | Hspa12a  |          |  |  |
| App12   | Sdsl     |          | Hspd1    |          |  |  |
| Aqp1    | Sema4b   |          | Hspe1    |          |  |  |
| Aqp11   | Sephs2   |          | Idua     |          |  |  |
| Aqp4    | Setmar   |          | Ifna14   |          |  |  |
| Aqp8    | Slc12a7  |          | Immp2l   |          |  |  |
| Ar      | Slc1a1   |          | Inmt     |          |  |  |
| Araf    | Slc22a23 |          | Ipo13    |          |  |  |

|          |          |  |         |  |  |
|----------|----------|--|---------|--|--|
| Arap2    | Slc25a22 |  | Iqsec1  |  |  |
| Arfrp1   | Slc25a28 |  | Josd2   |  |  |
| Arhgap12 | Slc25a29 |  | Kbtbd3  |  |  |
| Arhgap20 | Smcr71   |  | Kcnj5   |  |  |
| Arhgap24 | Snrpd3   |  | Kcnk3   |  |  |
| Arhgap26 | Snupn    |  | Kcnn1   |  |  |
| Arhgef15 | Sox2     |  | Kcnv2   |  |  |
| Arhgef17 | Ssr4     |  | Khk     |  |  |
| Arhgef19 | Ssxb10   |  | Klhdc1  |  |  |
| Arhgef6  | St13     |  | Klhl21  |  |  |
| Arhgef9  | Stfa1    |  | Kptn    |  |  |
| Arl5b    | Sumo3    |  | Lace1   |  |  |
| Arl6ip6  | Taf1a    |  | Larp2   |  |  |
| Armc1    | Telo2    |  | Larp7   |  |  |
| Armex3   | Tfpt     |  | Lcmt2   |  |  |
| Armet11  | Tmed9    |  | Lgr6    |  |  |
| Arpc51   | Tmem170b |  | Ligl2   |  |  |
| Arsk     | Tmem191c |  | Lmf1    |  |  |
| Art1     | Tmem196  |  | Lrrc3b  |  |  |
| Art4     | Tns1     |  | Lrtm1   |  |  |
| As3mt    | Tsr2     |  | Maf1    |  |  |
| Asah2    | Ubqln3   |  | Map3k10 |  |  |
| Asap3    | Vamp8    |  | Map3k4  |  |  |
| Asb10    | Wdr40b   |  | Metap11 |  |  |
| Asb11    | Zbed3    |  | Mettl5  |  |  |
| Asb13    | Zc3hc1   |  | Mfap3l  |  |  |
| Asb14    | Zfp574   |  | Mgrn1   |  |  |
| Asb2     | Zfp667   |  | Mif4gd  |  |  |
| Asb3     | Zim1     |  | Mipep   |  |  |
| Asb5     | Zscan20  |  | Mmaa    |  |  |
| Asb8     | Zswim7   |  | Mmab    |  |  |
| Ascc1    |          |  | Mpst    |  |  |
| Asna1    |          |  | Mrm1    |  |  |
| Asnsd1   |          |  | Mrpl2   |  |  |
| Asph     |          |  | Mrpl23  |  |  |
| Asrgl1   |          |  | Mrpl37  |  |  |
| Atad1    |          |  | Mrpl45  |  |  |
| Atf7ip   |          |  | Mrpl51  |  |  |
| Atg10    |          |  | Mrpl9   |  |  |
| Atg2a    |          |  | Mrps33  |  |  |
| Atg4c    |          |  | Mrps9   |  |  |
| Atm      |          |  | Mtg1    |  |  |
| Atp11a   |          |  | Mtx2    |  |  |
| Atp1a2   |          |  | Mul1    |  |  |
| Atp1b2   |          |  | Myh7b   |  |  |
| Atp2a2   |          |  | Nat11   |  |  |
| Atp2c1   |          |  | Nat5    |  |  |
| Atp5a1   |          |  | Ndufa1  |  |  |
| Atp5b    |          |  | Ndufa5  |  |  |
| Atp5c1   |          |  | Ndufaf4 |  |  |
| Atp5d    |          |  | Ndufb2  |  |  |
| Atp5e    |          |  | Ndufb4  |  |  |
| Atp5g1   |          |  | Ndufv3  |  |  |
| Atp5g2   |          |  | Neurl2  |  |  |
| Atp5g3   |          |  | Nfs1    |  |  |
| Atp5h    |          |  | Nr1h3   |  |  |
| Atp5j    |          |  | Nr3c2   |  |  |
| Atp5j2   |          |  | Nude    |  |  |
| Atp5k    |          |  | Nudt15  |  |  |
| Atp5l    |          |  | Nutf2   |  |  |
| Atp5o    |          |  | Oma1    |  |  |
| Atp5s    |          |  | Opa3    |  |  |
| Atp5sl   |          |  | Osbp2   |  |  |
| Atp6v0b  |          |  | Pcgf1   |  |  |
| Atp6v1d  |          |  | Pcx     |  |  |
| Atp6v1e1 |          |  | Pcvt2   |  |  |
| Atp6v1f  |          |  | Pded5   |  |  |
| Atp6v1g2 |          |  | Pde4d   |  |  |
| Atp8a1   |          |  | Pde7a   |  |  |

|          |  |  |          |  |  |
|----------|--|--|----------|--|--|
| Atp8a2   |  |  | Pdrg1    |  |  |
| Atp9a    |  |  | Peo1     |  |  |
| Atpaf1   |  |  | Perld1   |  |  |
| Atpaf2   |  |  | Pex10    |  |  |
| Atpif1   |  |  | Pex6     |  |  |
| Atxn1    |  |  | Pex7     |  |  |
| Atxn2    |  |  | Phkg1    |  |  |
| Auh      |  |  | Pigo     |  |  |
| Auts2    |  |  | Pigp     |  |  |
| B3galnt2 |  |  | Pigv     |  |  |
| B3galt2  |  |  | Pik3ip1  |  |  |
| B3gat3   |  |  | Pink1    |  |  |
| B4galt4  |  |  | Pkd2l2   |  |  |
| Bag1     |  |  | Pmpca    |  |  |
| Bag4     |  |  | Polq     |  |  |
| Bahcc1   |  |  | Polr2f   |  |  |
| Bak1     |  |  | Pomt1    |  |  |
| Bambi    |  |  | Ppargc1b |  |  |
| Banp     |  |  | Ppm1l    |  |  |
| Bat5     |  |  | Ppp1r12b |  |  |
| Baz1b    |  |  | Prkaa2   |  |  |
| Bbs2     |  |  | Prlr     |  |  |
| Bbs7     |  |  | Prox1    |  |  |
| Bbs9     |  |  | Pstpip2  |  |  |
| Bcam     |  |  | Pts      |  |  |
| Bcas3    |  |  | Pxmp2    |  |  |
| Bcat2    |  |  | Qrs1l    |  |  |
| Bche     |  |  | Qsox2    |  |  |
| Bckdha   |  |  | Rapsn    |  |  |
| Bckdk    |  |  | Rassf3   |  |  |
| Bcs1l    |  |  | Reep5    |  |  |
| Bhlhb9   |  |  | Repin1   |  |  |
| Blnk     |  |  | Retsat   |  |  |
| Bloc1s1  |  |  | Rhbdd3   |  |  |
| Bphl     |  |  | Rilp1l   |  |  |
| Brd7     |  |  | Rmnd1    |  |  |
| Brd9     |  |  | Rnf5     |  |  |
| Bri3bp   |  |  | Rnmtl1   |  |  |
| Brms1l   |  |  | Rpp21    |  |  |
| Brp44    |  |  | Rps6ka2  |  |  |
| Brp44l   |  |  | Samm50   |  |  |
| Brwd2    |  |  | Sar1b    |  |  |
| Bscl2    |  |  | Sbk1     |  |  |
| Btnl9    |  |  | Scn4a    |  |  |
| Btrc     |  |  | Scnm1    |  |  |
| Bves     |  |  | Sdhc     |  |  |
| C1qtnf7  |  |  | Sdr39u1  |  |  |
| C1qtnf9  |  |  | Sec31b   |  |  |
| C1s      |  |  | Slc17a7  |  |  |
| C2cd3    |  |  | Slc22a5  |  |  |
| C3       |  |  | Slc25a26 |  |  |
| C7       |  |  | Slc25a38 |  |  |
| C87436   |  |  | Slc2a4   |  |  |
| Cab39l   |  |  | Slc35e1  |  |  |
| Cabc1    |  |  | Slc4a3   |  |  |
| Cables1  |  |  | Slc5a6   |  |  |
| Cacna1c  |  |  | Slco5a1  |  |  |
| Cacna1g  |  |  | Sms      |  |  |
| Cacna2d1 |  |  | Sneg     |  |  |
| Cacnb2   |  |  | Snrpd2   |  |  |
| Calcocol |  |  | Sod1     |  |  |
| Camk2n1  |  |  | Sort1    |  |  |
| Camta1   |  |  | Speg     |  |  |
| Cand2    |  |  | Spg7     |  |  |
| Canx     |  |  | Spint2   |  |  |
| Cap2     |  |  | Spr      |  |  |
| Capn3    |  |  | Stard10  |  |  |
| Capn7    |  |  | Stard7   |  |  |
| Car14    |  |  | Stat5a   |  |  |

|          |  |  |         |  |  |  |
|----------|--|--|---------|--|--|--|
| Card10   |  |  | Stx4a   |  |  |  |
| Card6    |  |  | Suc1g1  |  |  |  |
| Carf     |  |  | Suc1g2  |  |  |  |
| Casd1    |  |  | Syt7    |  |  |  |
| Casp1    |  |  | Tars12  |  |  |  |
| Casq2    |  |  | Tatdn3  |  |  |  |
| Cbfa2t3  |  |  | Tbc1d16 |  |  |  |
| Cbr1     |  |  | Tcf15   |  |  |  |
| Cbr2     |  |  | Tfam    |  |  |  |
| Cbr4     |  |  | Tfb1m   |  |  |  |
| Cbx1     |  |  | Thap3   |  |  |  |
| Cbx8     |  |  | Thrb    |  |  |  |
| Ccbl1    |  |  | Tm2d3   |  |  |  |
| Ccbl2    |  |  | Tmed4   |  |  |  |
| Ccdc117  |  |  | Tmem14c |  |  |  |
| Ccdc21   |  |  | Tmem150 |  |  |  |
| Ccdc28a  |  |  | Tmem160 |  |  |  |
| Ccdc44   |  |  | Tmem177 |  |  |  |
| Ccdc45   |  |  | Tmem186 |  |  |  |
| Ccdc46   |  |  | Trip10  |  |  |  |
| Ccdc47   |  |  | Ttc38   |  |  |  |
| Ccdc51   |  |  | Tuba4a  |  |  |  |
| Ccdc52   |  |  | Tuba8   |  |  |  |
| Ccdc56   |  |  | Txnrd2  |  |  |  |
| Ccdc66   |  |  | Ubac1   |  |  |  |
| Ccdc69   |  |  | Ublcp1  |  |  |  |
| Ccdc72   |  |  | Ubxn2a  |  |  |  |
| Ccdc75   |  |  | Unc45b  |  |  |  |
| Ccdc85a  |  |  | Ung     |  |  |  |
| Ccdc91   |  |  | Uros    |  |  |  |
| Ccl11    |  |  | Uxt     |  |  |  |
| Ccl19    |  |  | Vars2   |  |  |  |
| Ccl21a   |  |  | Wdte1   |  |  |  |
| Ccl8     |  |  | Yars2   |  |  |  |
| Ccnd2    |  |  | Yif1b   |  |  |  |
| Ccng1    |  |  | Yjefn3  |  |  |  |
| Ceni     |  |  | Zerb1   |  |  |  |
| Cent2    |  |  | Zfp167  |  |  |  |
| Ccpg1    |  |  | Zfp346  |  |  |  |
| Ccrl2    |  |  | Zfp612  |  |  |  |
| Cd28     |  |  | Zfp691  |  |  |  |
| Cd300lg  |  |  | Zfp74   |  |  |  |
| Cd46     |  |  | Zfyve21 |  |  |  |
| Cd55     |  |  | Znrf1   |  |  |  |
| Cd59b    |  |  |         |  |  |  |
| Cd74     |  |  |         |  |  |  |
| Cd81     |  |  |         |  |  |  |
| Cd83     |  |  |         |  |  |  |
| Cdadc1   |  |  |         |  |  |  |
| Cdan1    |  |  |         |  |  |  |
| Cdc123   |  |  |         |  |  |  |
| Cdc14b   |  |  |         |  |  |  |
| Cdc23    |  |  |         |  |  |  |
| Cdc216   |  |  |         |  |  |  |
| Cdc37    |  |  |         |  |  |  |
| Cdc3711  |  |  |         |  |  |  |
| Cdh23    |  |  |         |  |  |  |
| Cdk10    |  |  |         |  |  |  |
| Cdk5     |  |  |         |  |  |  |
| Cdk5rap1 |  |  |         |  |  |  |
| Cdkal1   |  |  |         |  |  |  |
| Cdkl5    |  |  |         |  |  |  |
| Cdkn1c   |  |  |         |  |  |  |
| Ceacam1  |  |  |         |  |  |  |
| Cecr2    |  |  |         |  |  |  |
| Cenpa    |  |  |         |  |  |  |
| Cenpf    |  |  |         |  |  |  |
| Cenpg    |  |  |         |  |  |  |
| Cenpv    |  |  |         |  |  |  |

|         |  |  |  |  |  |  |
|---------|--|--|--|--|--|--|
| Cep63   |  |  |  |  |  |  |
| Cep68   |  |  |  |  |  |  |
| Cep70   |  |  |  |  |  |  |
| Cep97   |  |  |  |  |  |  |
| Cgrrf1  |  |  |  |  |  |  |
| Chchd10 |  |  |  |  |  |  |
| Chchd2  |  |  |  |  |  |  |
| Chchd3  |  |  |  |  |  |  |
| Chchd8  |  |  |  |  |  |  |
| Chd6    |  |  |  |  |  |  |
| Chek2   |  |  |  |  |  |  |
| Chid1   |  |  |  |  |  |  |
| Chordc1 |  |  |  |  |  |  |
| Chpt1   |  |  |  |  |  |  |
| Chrac1  |  |  |  |  |  |  |
| Chtf8   |  |  |  |  |  |  |
| Ciao1   |  |  |  |  |  |  |
| Cideb   |  |  |  |  |  |  |
| Cisd1   |  |  |  |  |  |  |
| Cish    |  |  |  |  |  |  |
| Cited4  |  |  |  |  |  |  |
| Ckm     |  |  |  |  |  |  |
| Ckmt2   |  |  |  |  |  |  |
| Clasp1  |  |  |  |  |  |  |
| Clasp2  |  |  |  |  |  |  |
| Clec1   |  |  |  |  |  |  |
| Clcn4-2 |  |  |  |  |  |  |
| Clec3b  |  |  |  |  |  |  |
| Clip1   |  |  |  |  |  |  |
| Clip4   |  |  |  |  |  |  |
| Clptm1  |  |  |  |  |  |  |
| Clpx    |  |  |  |  |  |  |
| Clstn1  |  |  |  |  |  |  |
| Clu     |  |  |  |  |  |  |
| Clybl   |  |  |  |  |  |  |
| Cmah    |  |  |  |  |  |  |
| Cmb1    |  |  |  |  |  |  |
| Cmc1    |  |  |  |  |  |  |
| Cmya5   |  |  |  |  |  |  |
| Cnm2    |  |  |  |  |  |  |
| Cnm3    |  |  |  |  |  |  |
| Cnot4   |  |  |  |  |  |  |
| Cnot8   |  |  |  |  |  |  |
| Cntn5   |  |  |  |  |  |  |
| Cog4    |  |  |  |  |  |  |
| Cog5    |  |  |  |  |  |  |
| Cog6    |  |  |  |  |  |  |
| Cog7    |  |  |  |  |  |  |
| Col14a1 |  |  |  |  |  |  |
| Colec11 |  |  |  |  |  |  |
| Colq    |  |  |  |  |  |  |
| Commd3  |  |  |  |  |  |  |
| Commd6  |  |  |  |  |  |  |
| Commd9  |  |  |  |  |  |  |
| Copg2   |  |  |  |  |  |  |
| Cops3   |  |  |  |  |  |  |
| Copz2   |  |  |  |  |  |  |
| Coq10a  |  |  |  |  |  |  |
| Coq2    |  |  |  |  |  |  |
| Coq5    |  |  |  |  |  |  |
| Coq6    |  |  |  |  |  |  |
| Coq9    |  |  |  |  |  |  |
| Corin   |  |  |  |  |  |  |
| Coro6   |  |  |  |  |  |  |
| Cox10   |  |  |  |  |  |  |
| Cox11   |  |  |  |  |  |  |
| Cox15   |  |  |  |  |  |  |
| Cox17   |  |  |  |  |  |  |
| Cox4i1  |  |  |  |  |  |  |

|         |  |  |  |  |  |  |
|---------|--|--|--|--|--|--|
| Cox5a   |  |  |  |  |  |  |
| Cox5b   |  |  |  |  |  |  |
| Cox6a2  |  |  |  |  |  |  |
| Cox6b1  |  |  |  |  |  |  |
| Cox6c   |  |  |  |  |  |  |
| Cox7a1  |  |  |  |  |  |  |
| Cox7a2  |  |  |  |  |  |  |
| Cox7a2l |  |  |  |  |  |  |
| Cox7b   |  |  |  |  |  |  |
| Cox8a   |  |  |  |  |  |  |
| Cox8b   |  |  |  |  |  |  |
| Cpa3    |  |  |  |  |  |  |
| Cpe     |  |  |  |  |  |  |
| Cpne3   |  |  |  |  |  |  |
| Cpped1  |  |  |  |  |  |  |
| Cpt1b   |  |  |  |  |  |  |
| Cpxm2   |  |  |  |  |  |  |
| Cradd   |  |  |  |  |  |  |
| Crat    |  |  |  |  |  |  |
| Creb1   |  |  |  |  |  |  |
| Crebbp  |  |  |  |  |  |  |
| Crebl2  |  |  |  |  |  |  |
| Creld1  |  |  |  |  |  |  |
| Crhr2   |  |  |  |  |  |  |
| Crip2   |  |  |  |  |  |  |
| Crot    |  |  |  |  |  |  |
| Crybg3  |  |  |  |  |  |  |
| Cryz    |  |  |  |  |  |  |
| Cryz1l  |  |  |  |  |  |  |
| Cs      |  |  |  |  |  |  |
| Csad    |  |  |  |  |  |  |
| Csdc2   |  |  |  |  |  |  |
| Csde1   |  |  |  |  |  |  |
| Csprs   |  |  |  |  |  |  |
| Cst3    |  |  |  |  |  |  |
| Ctef    |  |  |  |  |  |  |
| Ctdsp1  |  |  |  |  |  |  |
| Ctla4   |  |  |  |  |  |  |
| Ctnna3  |  |  |  |  |  |  |
| Ctnnal1 |  |  |  |  |  |  |
| Ctns    |  |  |  |  |  |  |
| Ctsa    |  |  |  |  |  |  |
| Ctsd    |  |  |  |  |  |  |
| Ctsf    |  |  |  |  |  |  |
| Ctso    |  |  |  |  |  |  |
| Cugbp2  |  |  |  |  |  |  |
| Cul4a   |  |  |  |  |  |  |
| Cul9    |  |  |  |  |  |  |
| Cuta    |  |  |  |  |  |  |
| Cx3cr1  |  |  |  |  |  |  |
| Cxcl16  |  |  |  |  |  |  |
| Cxx1b   |  |  |  |  |  |  |
| Cxx1c   |  |  |  |  |  |  |
| Cxxc5   |  |  |  |  |  |  |
| Cyb5d1  |  |  |  |  |  |  |
| Cyb5rl  |  |  |  |  |  |  |
| Cye1    |  |  |  |  |  |  |
| Cycs    |  |  |  |  |  |  |
| Cyfp2   |  |  |  |  |  |  |
| Cyhr1   |  |  |  |  |  |  |
| Cyp27a1 |  |  |  |  |  |  |
| Cyp2j6  |  |  |  |  |  |  |
| Cyp2j9  |  |  |  |  |  |  |
| Cyp39a1 |  |  |  |  |  |  |
| Cyth1   |  |  |  |  |  |  |
| Cytl1   |  |  |  |  |  |  |
| D2hgdh  |  |  |  |  |  |  |
| Daam1   |  |  |  |  |  |  |
| Dach1   |  |  |  |  |  |  |



|         |  |  |  |  |  |  |
|---------|--|--|--|--|--|--|
| Dalrd3  |  |  |  |  |  |  |
| Dapk2   |  |  |  |  |  |  |
| Dars2   |  |  |  |  |  |  |
| Dbp     |  |  |  |  |  |  |
| Dbt     |  |  |  |  |  |  |
| Dci     |  |  |  |  |  |  |
| Dclre1a |  |  |  |  |  |  |
| Dcn     |  |  |  |  |  |  |
| Dcps    |  |  |  |  |  |  |
| Dctn3   |  |  |  |  |  |  |
| Dcun1d4 |  |  |  |  |  |  |
| Dcxr    |  |  |  |  |  |  |
| Ddb2    |  |  |  |  |  |  |
| Ddo     |  |  |  |  |  |  |
| Ddt     |  |  |  |  |  |  |
| Deb1    |  |  |  |  |  |  |
| Decr1   |  |  |  |  |  |  |
| Decr2   |  |  |  |  |  |  |
| Def8    |  |  |  |  |  |  |
| Dennd1a |  |  |  |  |  |  |
| Dennd5b |  |  |  |  |  |  |
| Depdc5  |  |  |  |  |  |  |
| Det1    |  |  |  |  |  |  |
| Dexi    |  |  |  |  |  |  |
| Dgat2   |  |  |  |  |  |  |
| Dgcr6   |  |  |  |  |  |  |
| Dgka    |  |  |  |  |  |  |
| Dgkb    |  |  |  |  |  |  |
| Dguok   |  |  |  |  |  |  |
| Dhodh   |  |  |  |  |  |  |
| Dhrs1   |  |  |  |  |  |  |
| Dhrs11  |  |  |  |  |  |  |
| Dhrs3   |  |  |  |  |  |  |
| Dhrs7   |  |  |  |  |  |  |
| Dhrs7b  |  |  |  |  |  |  |
| Dhrs7c  |  |  |  |  |  |  |
| Diablo  |  |  |  |  |  |  |
| Diras2  |  |  |  |  |  |  |
| Dirc2   |  |  |  |  |  |  |
| Dis3l   |  |  |  |  |  |  |
| Disp1   |  |  |  |  |  |  |
| Dixdc1  |  |  |  |  |  |  |
| Dlat    |  |  |  |  |  |  |
| Dld     |  |  |  |  |  |  |
| Dlg1    |  |  |  |  |  |  |
| Dlst    |  |  |  |  |  |  |
| Dmpk    |  |  |  |  |  |  |
| Dmx11   |  |  |  |  |  |  |
| Dnaja2  |  |  |  |  |  |  |
| Dnaja4  |  |  |  |  |  |  |
| Dnajb5  |  |  |  |  |  |  |
| Dnajc15 |  |  |  |  |  |  |
| Dnajc18 |  |  |  |  |  |  |
| Dnajc19 |  |  |  |  |  |  |
| Dnajc24 |  |  |  |  |  |  |
| Dnajc4  |  |  |  |  |  |  |
| Dnajc9  |  |  |  |  |  |  |
| Dnalc4  |  |  |  |  |  |  |
| Dnmt3a  |  |  |  |  |  |  |
| Doc2g   |  |  |  |  |  |  |
| Dock6   |  |  |  |  |  |  |
| Dok4    |  |  |  |  |  |  |
| Dpf2    |  |  |  |  |  |  |
| Dpf3    |  |  |  |  |  |  |
| Dpml    |  |  |  |  |  |  |
| Dpt     |  |  |  |  |  |  |
| Dpy30   |  |  |  |  |  |  |
| Dpyd    |  |  |  |  |  |  |
| Dpysl4  |  |  |  |  |  |  |

|          |  |  |  |  |  |  |
|----------|--|--|--|--|--|--|
| Dsc2     |  |  |  |  |  |  |
| Dsp      |  |  |  |  |  |  |
| Dtd1     |  |  |  |  |  |  |
| Dtnbp1   |  |  |  |  |  |  |
| Dtx3     |  |  |  |  |  |  |
| Dtx3l    |  |  |  |  |  |  |
| Dtymk    |  |  |  |  |  |  |
| Dus4l    |  |  |  |  |  |  |
| Dusp19   |  |  |  |  |  |  |
| Dusp28   |  |  |  |  |  |  |
| Dusp7    |  |  |  |  |  |  |
| Dym      |  |  |  |  |  |  |
| Dyrk1b   |  |  |  |  |  |  |
| Dzip3    |  |  |  |  |  |  |
| E2f6     |  |  |  |  |  |  |
| Ebf2     |  |  |  |  |  |  |
| Ebf3     |  |  |  |  |  |  |
| Ech1     |  |  |  |  |  |  |
| Echdc1   |  |  |  |  |  |  |
| Echdc2   |  |  |  |  |  |  |
| Echdc3   |  |  |  |  |  |  |
| Echs1    |  |  |  |  |  |  |
| Ecm2     |  |  |  |  |  |  |
| Ecsit    |  |  |  |  |  |  |
| Edf1     |  |  |  |  |  |  |
| Ednra    |  |  |  |  |  |  |
| Eepd1    |  |  |  |  |  |  |
| Efcab2   |  |  |  |  |  |  |
| Efha1    |  |  |  |  |  |  |
| Egflam   |  |  |  |  |  |  |
| Ehbp1    |  |  |  |  |  |  |
| Ehhadh   |  |  |  |  |  |  |
| Eif1     |  |  |  |  |  |  |
| Eif2b4   |  |  |  |  |  |  |
| Eif4e    |  |  |  |  |  |  |
| Elf2     |  |  |  |  |  |  |
| Elmod2   |  |  |  |  |  |  |
| Elp4     |  |  |  |  |  |  |
| Eml1     |  |  |  |  |  |  |
| Endog    |  |  |  |  |  |  |
| Eno3     |  |  |  |  |  |  |
| Enox2    |  |  |  |  |  |  |
| Enpep    |  |  |  |  |  |  |
| Enpp3    |  |  |  |  |  |  |
| Enpp5    |  |  |  |  |  |  |
| Entpd2   |  |  |  |  |  |  |
| Entpd4   |  |  |  |  |  |  |
| Entpd5   |  |  |  |  |  |  |
| Epb4.113 |  |  |  |  |  |  |
| Epb4.115 |  |  |  |  |  |  |
| Epha7    |  |  |  |  |  |  |
| Ephb3    |  |  |  |  |  |  |
| Ephx1    |  |  |  |  |  |  |
| Ephx2    |  |  |  |  |  |  |
| Epm2a    |  |  |  |  |  |  |
| Epn3     |  |  |  |  |  |  |
| Eps8l1   |  |  |  |  |  |  |
| Erap1    |  |  |  |  |  |  |
| ErbB4    |  |  |  |  |  |  |
| Ergic3   |  |  |  |  |  |  |
| Eri3     |  |  |  |  |  |  |
| Esco1    |  |  |  |  |  |  |
| Esrrb    |  |  |  |  |  |  |
| Etfa     |  |  |  |  |  |  |
| Etfb     |  |  |  |  |  |  |
| Etfdh    |  |  |  |  |  |  |
| Ethe1    |  |  |  |  |  |  |
| Etl4     |  |  |  |  |  |  |
| Etv1     |  |  |  |  |  |  |

|          |  |  |  |  |  |  |
|----------|--|--|--|--|--|--|
| Exd2     |  |  |  |  |  |  |
| Exoc3    |  |  |  |  |  |  |
| Exoc4    |  |  |  |  |  |  |
| Exoc8    |  |  |  |  |  |  |
| Extl3    |  |  |  |  |  |  |
| Eya3     |  |  |  |  |  |  |
| Ezh1     |  |  |  |  |  |  |
| F3       |  |  |  |  |  |  |
| Faf1     |  |  |  |  |  |  |
| Fahd1    |  |  |  |  |  |  |
| Fam110b  |  |  |  |  |  |  |
| Fam114a2 |  |  |  |  |  |  |
| Fam118b  |  |  |  |  |  |  |
| Fam120b  |  |  |  |  |  |  |
| Fam120c  |  |  |  |  |  |  |
| Fam126a  |  |  |  |  |  |  |
| Fam128b  |  |  |  |  |  |  |
| Fam132a  |  |  |  |  |  |  |
| Fam13a   |  |  |  |  |  |  |
| Fam149b  |  |  |  |  |  |  |
| Fam160a1 |  |  |  |  |  |  |
| Fam161b  |  |  |  |  |  |  |
| Fam173a  |  |  |  |  |  |  |
| Fam173b  |  |  |  |  |  |  |
| Fam174a  |  |  |  |  |  |  |
| Fam174b  |  |  |  |  |  |  |
| Fam175a  |  |  |  |  |  |  |
| Fam179a  |  |  |  |  |  |  |
| Fam20b   |  |  |  |  |  |  |
| Fam40b   |  |  |  |  |  |  |
| Fam53b   |  |  |  |  |  |  |
| Fam54b   |  |  |  |  |  |  |
| Fam55d   |  |  |  |  |  |  |
| Fam59a   |  |  |  |  |  |  |
| Fam69b   |  |  |  |  |  |  |
| Fam70b   |  |  |  |  |  |  |
| Fam73b   |  |  |  |  |  |  |
| Fam78a   |  |  |  |  |  |  |
| Fam81a   |  |  |  |  |  |  |
| Fam82a1  |  |  |  |  |  |  |
| Fam82a2  |  |  |  |  |  |  |
| Fam82b   |  |  |  |  |  |  |
| Fam92a   |  |  |  |  |  |  |
| Fam96a   |  |  |  |  |  |  |
| Fam96b   |  |  |  |  |  |  |
| Fancl    |  |  |  |  |  |  |
| Fars2    |  |  |  |  |  |  |
| Fastk    |  |  |  |  |  |  |
| Fastkd1  |  |  |  |  |  |  |
| Fastkd2  |  |  |  |  |  |  |
| Fat4     |  |  |  |  |  |  |
| Fblim1   |  |  |  |  |  |  |
| Fbln1    |  |  |  |  |  |  |
| Fbxl20   |  |  |  |  |  |  |
| Fbxl22   |  |  |  |  |  |  |
| Fbxo18   |  |  |  |  |  |  |
| Fbxo21   |  |  |  |  |  |  |
| Fbxo22   |  |  |  |  |  |  |
| Fbxo25   |  |  |  |  |  |  |
| Fbxo3    |  |  |  |  |  |  |
| Fbxo31   |  |  |  |  |  |  |
| Fbxo32   |  |  |  |  |  |  |
| Fbxo40   |  |  |  |  |  |  |
| Fbxo44   |  |  |  |  |  |  |
| Fbxo8    |  |  |  |  |  |  |
| Fbxw4    |  |  |  |  |  |  |
| Fbxw5    |  |  |  |  |  |  |
| Fbxw7    |  |  |  |  |  |  |
| Fcgrt    |  |  |  |  |  |  |

|            |  |  |  |  |  |  |
|------------|--|--|--|--|--|--|
| Fchsd2     |  |  |  |  |  |  |
| Fcrls      |  |  |  |  |  |  |
| Fdx1       |  |  |  |  |  |  |
| Fgd4       |  |  |  |  |  |  |
| Fgf13      |  |  |  |  |  |  |
| Fgf14      |  |  |  |  |  |  |
| Fgf16      |  |  |  |  |  |  |
| Fgf9       |  |  |  |  |  |  |
| Fggy       |  |  |  |  |  |  |
| Fhl1       |  |  |  |  |  |  |
| Fhl2       |  |  |  |  |  |  |
| Fhod3      |  |  |  |  |  |  |
| Fig4       |  |  |  |  |  |  |
| Figl       |  |  |  |  |  |  |
| Filip1     |  |  |  |  |  |  |
| Filip1l    |  |  |  |  |  |  |
| Fis1       |  |  |  |  |  |  |
| Fitm1      |  |  |  |  |  |  |
| Fkbp3      |  |  |  |  |  |  |
| Fktn       |  |  |  |  |  |  |
| Flot1      |  |  |  |  |  |  |
| Flt3l      |  |  |  |  |  |  |
| Fmc1       |  |  |  |  |  |  |
| Fmo1       |  |  |  |  |  |  |
| Fmo5       |  |  |  |  |  |  |
| Fn3krp     |  |  |  |  |  |  |
| Fnbp1      |  |  |  |  |  |  |
| Fndc5      |  |  |  |  |  |  |
| Fnip1      |  |  |  |  |  |  |
| Fnta       |  |  |  |  |  |  |
| Folr2      |  |  |  |  |  |  |
| Foxj2      |  |  |  |  |  |  |
| Foxn3      |  |  |  |  |  |  |
| Foxo3      |  |  |  |  |  |  |
| Foxred1    |  |  |  |  |  |  |
| Frag1      |  |  |  |  |  |  |
| Frem2      |  |  |  |  |  |  |
| Frmf5      |  |  |  |  |  |  |
| Frs2       |  |  |  |  |  |  |
| Fsd2       |  |  |  |  |  |  |
| Fuca2      |  |  |  |  |  |  |
| Fundc1     |  |  |  |  |  |  |
| Fundc2     |  |  |  |  |  |  |
| Fut8       |  |  |  |  |  |  |
| Fv1        |  |  |  |  |  |  |
| Fxyd1      |  |  |  |  |  |  |
| Fycol      |  |  |  |  |  |  |
| Fzd6       |  |  |  |  |  |  |
| G0s2       |  |  |  |  |  |  |
| G6pc3      |  |  |  |  |  |  |
| Gaa        |  |  |  |  |  |  |
| Gab1       |  |  |  |  |  |  |
| Gabarap    |  |  |  |  |  |  |
| Gadd45gip1 |  |  |  |  |  |  |
| Gal3st2    |  |  |  |  |  |  |
| Galnt11    |  |  |  |  |  |  |
| Galt       |  |  |  |  |  |  |
| Gamt       |  |  |  |  |  |  |
| Garnl1     |  |  |  |  |  |  |
| Gas6       |  |  |  |  |  |  |
| Gate       |  |  |  |  |  |  |
| Gatsl2     |  |  |  |  |  |  |
| Gbas       |  |  |  |  |  |  |
| Gbp4       |  |  |  |  |  |  |
| Gbp6       |  |  |  |  |  |  |
| Gca        |  |  |  |  |  |  |
| Gcdh       |  |  |  |  |  |  |
| Gck        |  |  |  |  |  |  |
| Gcom1      |  |  |  |  |  |  |

|         |  |  |  |  |  |  |
|---------|--|--|--|--|--|--|
| Gdap10  |  |  |  |  |  |  |
| Gdpd1   |  |  |  |  |  |  |
| Gdpd5   |  |  |  |  |  |  |
| Gfm1    |  |  |  |  |  |  |
| Gfm2    |  |  |  |  |  |  |
| Gfra4   |  |  |  |  |  |  |
| Ggcx    |  |  |  |  |  |  |
| Ghdc    |  |  |  |  |  |  |
| Ghitm   |  |  |  |  |  |  |
| Ghr     |  |  |  |  |  |  |
| Gins4   |  |  |  |  |  |  |
| Gja1    |  |  |  |  |  |  |
| Gja3    |  |  |  |  |  |  |
| Gkap1   |  |  |  |  |  |  |
| Glb1    |  |  |  |  |  |  |
| Glcc1   |  |  |  |  |  |  |
| Glo1    |  |  |  |  |  |  |
| Glr2    |  |  |  |  |  |  |
| Glr5    |  |  |  |  |  |  |
| Glt25d2 |  |  |  |  |  |  |
| Glt8d1  |  |  |  |  |  |  |
| Gm1614  |  |  |  |  |  |  |
| Gm166   |  |  |  |  |  |  |
| Gm239   |  |  |  |  |  |  |
| Gm428   |  |  |  |  |  |  |
| Gm561   |  |  |  |  |  |  |
| Gm572   |  |  |  |  |  |  |
| Gm826   |  |  |  |  |  |  |
| Gmnn    |  |  |  |  |  |  |
| Gmpr    |  |  |  |  |  |  |
| Gna12   |  |  |  |  |  |  |
| Gnb5    |  |  |  |  |  |  |
| Gnmt    |  |  |  |  |  |  |
| Gnpat   |  |  |  |  |  |  |
| Gnpda1  |  |  |  |  |  |  |
| Gnptab  |  |  |  |  |  |  |
| Gnptg   |  |  |  |  |  |  |
| Golga4  |  |  |  |  |  |  |
| Gorasp1 |  |  |  |  |  |  |
| Got1    |  |  |  |  |  |  |
| Got2    |  |  |  |  |  |  |
| Gpam    |  |  |  |  |  |  |
| Gpatch8 |  |  |  |  |  |  |
| Gpbp111 |  |  |  |  |  |  |
| Gpc1    |  |  |  |  |  |  |
| Gpd11   |  |  |  |  |  |  |
| Gpld1   |  |  |  |  |  |  |
| Gpn3    |  |  |  |  |  |  |
| Gpr108  |  |  |  |  |  |  |
| Gpr125  |  |  |  |  |  |  |
| Gpr137b |  |  |  |  |  |  |
| Gpr175  |  |  |  |  |  |  |
| Gpr22   |  |  |  |  |  |  |
| Gpr89   |  |  |  |  |  |  |
| Gprasp1 |  |  |  |  |  |  |
| Gpre5c  |  |  |  |  |  |  |
| Gpsm1   |  |  |  |  |  |  |
| Gpsn2   |  |  |  |  |  |  |
| Gpt2    |  |  |  |  |  |  |
| Gpx4    |  |  |  |  |  |  |
| Gramd1b |  |  |  |  |  |  |
| Gramd4  |  |  |  |  |  |  |
| Grb14   |  |  |  |  |  |  |
| Grhpr   |  |  |  |  |  |  |
| Grin1a  |  |  |  |  |  |  |
| Grm1    |  |  |  |  |  |  |
| Grsf1   |  |  |  |  |  |  |
| Gsn     |  |  |  |  |  |  |
| Gstk1   |  |  |  |  |  |  |

|           |  |  |  |  |  |  |
|-----------|--|--|--|--|--|--|
| Gstm1     |  |  |  |  |  |  |
| Gstm2     |  |  |  |  |  |  |
| Gstm3     |  |  |  |  |  |  |
| Gstm4     |  |  |  |  |  |  |
| Gstm5     |  |  |  |  |  |  |
| Gstm7     |  |  |  |  |  |  |
| Gstp1     |  |  |  |  |  |  |
| Gstp2     |  |  |  |  |  |  |
| Gstt1     |  |  |  |  |  |  |
| Gstz1     |  |  |  |  |  |  |
| Gtf2h2    |  |  |  |  |  |  |
| Gtf2i     |  |  |  |  |  |  |
| Gtf3c1    |  |  |  |  |  |  |
| Gtpbp8    |  |  |  |  |  |  |
| Gucy1a2   |  |  |  |  |  |  |
| Gucy1a3   |  |  |  |  |  |  |
| Gucy1b3   |  |  |  |  |  |  |
| Gypc      |  |  |  |  |  |  |
| Gzmm      |  |  |  |  |  |  |
| H2-Eb1    |  |  |  |  |  |  |
| H2-Ke6    |  |  |  |  |  |  |
| H2-T24    |  |  |  |  |  |  |
| H2afv     |  |  |  |  |  |  |
| Hac11     |  |  |  |  |  |  |
| Hadh      |  |  |  |  |  |  |
| Hadha     |  |  |  |  |  |  |
| Hadhb     |  |  |  |  |  |  |
| Hagh      |  |  |  |  |  |  |
| Hars2     |  |  |  |  |  |  |
| Haus1     |  |  |  |  |  |  |
| Haus5     |  |  |  |  |  |  |
| Haus8     |  |  |  |  |  |  |
| Hbp1      |  |  |  |  |  |  |
| Hbs11     |  |  |  |  |  |  |
| Hbxip     |  |  |  |  |  |  |
| Hccs      |  |  |  |  |  |  |
| Hcfc1r1   |  |  |  |  |  |  |
| Hcn2      |  |  |  |  |  |  |
| Hcn4      |  |  |  |  |  |  |
| Hdac10    |  |  |  |  |  |  |
| Hdac2     |  |  |  |  |  |  |
| Hdac5     |  |  |  |  |  |  |
| Hdac8     |  |  |  |  |  |  |
| Hdac9     |  |  |  |  |  |  |
| Hddc3     |  |  |  |  |  |  |
| Hdhd2     |  |  |  |  |  |  |
| Heatr5b   |  |  |  |  |  |  |
| Helz      |  |  |  |  |  |  |
| Hemk1     |  |  |  |  |  |  |
| Herpud1   |  |  |  |  |  |  |
| Hes6      |  |  |  |  |  |  |
| Hexa      |  |  |  |  |  |  |
| Hexim1    |  |  |  |  |  |  |
| Hfe       |  |  |  |  |  |  |
| Hfe2      |  |  |  |  |  |  |
| Hhat1     |  |  |  |  |  |  |
| Hibadh    |  |  |  |  |  |  |
| Hibch     |  |  |  |  |  |  |
| Hif1an    |  |  |  |  |  |  |
| Higd2a    |  |  |  |  |  |  |
| Hint2     |  |  |  |  |  |  |
| Hint3     |  |  |  |  |  |  |
| Hisppd1   |  |  |  |  |  |  |
| Hist1h1e  |  |  |  |  |  |  |
| Hist1h2bc |  |  |  |  |  |  |
| Hist1h4h  |  |  |  |  |  |  |
| Hist2h2be |  |  |  |  |  |  |
| Hist3h2a  |  |  |  |  |  |  |
| Hlf       |  |  |  |  |  |  |

|         |  |  |  |  |  |  |
|---------|--|--|--|--|--|--|
| Hltf    |  |  |  |  |  |  |
| Hmbs    |  |  |  |  |  |  |
| Hmgb3   |  |  |  |  |  |  |
| Hmgcs2  |  |  |  |  |  |  |
| Hmgn2   |  |  |  |  |  |  |
| Hnmt    |  |  |  |  |  |  |
| Homer2  |  |  |  |  |  |  |
| Hopx    |  |  |  |  |  |  |
| Hp1bp3  |  |  |  |  |  |  |
| Hpgd    |  |  |  |  |  |  |
| Hps4    |  |  |  |  |  |  |
| Hrasls  |  |  |  |  |  |  |
| Hrsp12  |  |  |  |  |  |  |
| Hs1bp3  |  |  |  |  |  |  |
| Hs3st5  |  |  |  |  |  |  |
| Hsbp1   |  |  |  |  |  |  |
| Hscb    |  |  |  |  |  |  |
| Hsfl    |  |  |  |  |  |  |
| Hspa4l  |  |  |  |  |  |  |
| Hspa9   |  |  |  |  |  |  |
| Hspb3   |  |  |  |  |  |  |
| Hspbp1  |  |  |  |  |  |  |
| Htatip2 |  |  |  |  |  |  |
| Htatsf1 |  |  |  |  |  |  |
| Htra1   |  |  |  |  |  |  |
| Htra3   |  |  |  |  |  |  |
| Htra4   |  |  |  |  |  |  |
| Hyal1   |  |  |  |  |  |  |
| Hyls1   |  |  |  |  |  |  |
| Iars2   |  |  |  |  |  |  |
| Ical    |  |  |  |  |  |  |
| Ict1    |  |  |  |  |  |  |
| Idh2    |  |  |  |  |  |  |
| Idh3a   |  |  |  |  |  |  |
| Idh3b   |  |  |  |  |  |  |
| Idh3g   |  |  |  |  |  |  |
| Ids     |  |  |  |  |  |  |
| Ifi203  |  |  |  |  |  |  |
| Ifi205  |  |  |  |  |  |  |
| Ifngr2  |  |  |  |  |  |  |
| Ift140  |  |  |  |  |  |  |
| Ift172  |  |  |  |  |  |  |
| Ift20   |  |  |  |  |  |  |
| Ift80   |  |  |  |  |  |  |
| Ift81   |  |  |  |  |  |  |
| Igfbp1  |  |  |  |  |  |  |
| Igdcc4  |  |  |  |  |  |  |
| Igf2    |  |  |  |  |  |  |
| Igf2r   |  |  |  |  |  |  |
| Igfals  |  |  |  |  |  |  |
| Igfbp4  |  |  |  |  |  |  |
| Igfbp5  |  |  |  |  |  |  |
| Igfbp6  |  |  |  |  |  |  |
| Igfp1   |  |  |  |  |  |  |
| Ikzf2   |  |  |  |  |  |  |
| Il10rb  |  |  |  |  |  |  |
| Il11ra1 |  |  |  |  |  |  |
| Il15    |  |  |  |  |  |  |
| Il15ra  |  |  |  |  |  |  |
| Il17rd  |  |  |  |  |  |  |
| Immp11  |  |  |  |  |  |  |
| Immt    |  |  |  |  |  |  |
| Inadl   |  |  |  |  |  |  |
| Inca1   |  |  |  |  |  |  |
| Ing4    |  |  |  |  |  |  |
| Inpp4a  |  |  |  |  |  |  |
| Inpp5a  |  |  |  |  |  |  |
| Inpp5e  |  |  |  |  |  |  |
| Inpp5j  |  |  |  |  |  |  |

|          |  |  |  |  |  |  |
|----------|--|--|--|--|--|--|
| Inpp5k   |  |  |  |  |  |  |
| Inpp11   |  |  |  |  |  |  |
| Insig2   |  |  |  |  |  |  |
| Ints10   |  |  |  |  |  |  |
| Intu     |  |  |  |  |  |  |
| Ip6k3    |  |  |  |  |  |  |
| Ipo8     |  |  |  |  |  |  |
| Ipp      |  |  |  |  |  |  |
| Iqcb1    |  |  |  |  |  |  |
| Iqcc     |  |  |  |  |  |  |
| Iqwd1    |  |  |  |  |  |  |
| Irak1bp1 |  |  |  |  |  |  |
| Irf2bp1  |  |  |  |  |  |  |
| Irgm2    |  |  |  |  |  |  |
| Irs1     |  |  |  |  |  |  |
| Irx3     |  |  |  |  |  |  |
| Irx4     |  |  |  |  |  |  |
| Isca1    |  |  |  |  |  |  |
| Isca2    |  |  |  |  |  |  |
| Islr     |  |  |  |  |  |  |
| Isoc1    |  |  |  |  |  |  |
| Isyna1   |  |  |  |  |  |  |
| Itfg1    |  |  |  |  |  |  |
| Itfg2    |  |  |  |  |  |  |
| Itfg3    |  |  |  |  |  |  |
| Itga1    |  |  |  |  |  |  |
| Itgb1bp2 |  |  |  |  |  |  |
| Itgb6    |  |  |  |  |  |  |
| Itih5    |  |  |  |  |  |  |
| Itm2a    |  |  |  |  |  |  |
| Itm2b    |  |  |  |  |  |  |
| Itpa     |  |  |  |  |  |  |
| Itpkb    |  |  |  |  |  |  |
| Itpr1    |  |  |  |  |  |  |
| Itsn1    |  |  |  |  |  |  |
| Ivd      |  |  |  |  |  |  |
| Ivns1abp |  |  |  |  |  |  |
| Jam2     |  |  |  |  |  |  |
| Jarid2   |  |  |  |  |  |  |
| Jmjd8    |  |  |  |  |  |  |
| Jmy      |  |  |  |  |  |  |
| Josd1    |  |  |  |  |  |  |
| Jtb      |  |  |  |  |  |  |
| Kank2    |  |  |  |  |  |  |
| Kank3    |  |  |  |  |  |  |
| Katn11   |  |  |  |  |  |  |
| Kbtbd4   |  |  |  |  |  |  |
| Kbtbd7   |  |  |  |  |  |  |
| Kcna5    |  |  |  |  |  |  |
| Kcna7    |  |  |  |  |  |  |
| Kcnb1    |  |  |  |  |  |  |
| Kcnd3    |  |  |  |  |  |  |
| Kcng2    |  |  |  |  |  |  |
| Kcnh2    |  |  |  |  |  |  |
| Kcnip2   |  |  |  |  |  |  |
| Kcnj11   |  |  |  |  |  |  |
| Kcnj12   |  |  |  |  |  |  |
| Kcnn2    |  |  |  |  |  |  |
| Kcnq1    |  |  |  |  |  |  |
| Kcnt2    |  |  |  |  |  |  |
| Kctd1    |  |  |  |  |  |  |
| Kctd2    |  |  |  |  |  |  |
| Kctd21   |  |  |  |  |  |  |
| Kdelc2   |  |  |  |  |  |  |
| Kdm2b    |  |  |  |  |  |  |
| Kdm5d    |  |  |  |  |  |  |
| Kdr      |  |  |  |  |  |  |
| Khdrbs3  |  |  |  |  |  |  |
| Kif13a   |  |  |  |  |  |  |



|         |  |  |  |  |  |  |
|---------|--|--|--|--|--|--|
| Kif13b  |  |  |  |  |  |  |
| Kif16b  |  |  |  |  |  |  |
| Kif1c   |  |  |  |  |  |  |
| Kif21a  |  |  |  |  |  |  |
| Kif3c   |  |  |  |  |  |  |
| Kif7    |  |  |  |  |  |  |
| Kifap3  |  |  |  |  |  |  |
| Kifc2   |  |  |  |  |  |  |
| Kifc3   |  |  |  |  |  |  |
| Klc2    |  |  |  |  |  |  |
| Klc4    |  |  |  |  |  |  |
| Klf12   |  |  |  |  |  |  |
| Klf15   |  |  |  |  |  |  |
| Klf2    |  |  |  |  |  |  |
| Klhdc2  |  |  |  |  |  |  |
| Klhdc8a |  |  |  |  |  |  |
| Klhl13  |  |  |  |  |  |  |
| Klhl22  |  |  |  |  |  |  |
| Klhl23  |  |  |  |  |  |  |
| Klhl24  |  |  |  |  |  |  |
| Klhl30  |  |  |  |  |  |  |
| Klhl31  |  |  |  |  |  |  |
| Klhl32  |  |  |  |  |  |  |
| Klhl7   |  |  |  |  |  |  |
| Klhl8   |  |  |  |  |  |  |
| Krba1   |  |  |  |  |  |  |
| Krt222  |  |  |  |  |  |  |
| Ktn1    |  |  |  |  |  |  |
| Ky      |  |  |  |  |  |  |
| L2hgdh  |  |  |  |  |  |  |
| Lactb   |  |  |  |  |  |  |
| Lage3   |  |  |  |  |  |  |
| Lama2   |  |  |  |  |  |  |
| Lamb2   |  |  |  |  |  |  |
| Lamp2   |  |  |  |  |  |  |
| Lancl1  |  |  |  |  |  |  |
| Laptm4a |  |  |  |  |  |  |
| Laptm4b |  |  |  |  |  |  |
| Lars2   |  |  |  |  |  |  |
| Lass4   |  |  |  |  |  |  |
| Lcmt1   |  |  |  |  |  |  |
| Ldb3    |  |  |  |  |  |  |
| Ldhh    |  |  |  |  |  |  |
| Ldhd    |  |  |  |  |  |  |
| Letm1   |  |  |  |  |  |  |
| Letm2   |  |  |  |  |  |  |
| Lgi1    |  |  |  |  |  |  |
| Lgtn    |  |  |  |  |  |  |
| Lifr    |  |  |  |  |  |  |
| Limch1  |  |  |  |  |  |  |
| Lims1   |  |  |  |  |  |  |
| Lims2   |  |  |  |  |  |  |
| Lix1    |  |  |  |  |  |  |
| Lman2l  |  |  |  |  |  |  |
| Lmbr1   |  |  |  |  |  |  |
| Lmbrd1  |  |  |  |  |  |  |
| Lmod2   |  |  |  |  |  |  |
| Lmtk2   |  |  |  |  |  |  |
| Lonp1   |  |  |  |  |  |  |
| Lonp2   |  |  |  |  |  |  |
| Lonrf2  |  |  |  |  |  |  |
| Lpgat1  |  |  |  |  |  |  |
| Lphn2   |  |  |  |  |  |  |
| Lpin1   |  |  |  |  |  |  |
| Lpl     |  |  |  |  |  |  |
| Lrba    |  |  |  |  |  |  |
| Lrp4    |  |  |  |  |  |  |
| Lrp6    |  |  |  |  |  |  |
| Lrpprc  |  |  |  |  |  |  |

|           |  |  |  |  |  |  |
|-----------|--|--|--|--|--|--|
| Lrrc1     |  |  |  |  |  |  |
| Lrrc10    |  |  |  |  |  |  |
| Lrrc2     |  |  |  |  |  |  |
| Lrrc20    |  |  |  |  |  |  |
| Lrrc39    |  |  |  |  |  |  |
| Lrrc48    |  |  |  |  |  |  |
| Lrrc52    |  |  |  |  |  |  |
| Lrrc57    |  |  |  |  |  |  |
| Lrrc68    |  |  |  |  |  |  |
| Lrrcc1    |  |  |  |  |  |  |
| Lrrfip2   |  |  |  |  |  |  |
| Lrrk2     |  |  |  |  |  |  |
| Lsm10     |  |  |  |  |  |  |
| Lsmd1     |  |  |  |  |  |  |
| Ltbp1     |  |  |  |  |  |  |
| Lum       |  |  |  |  |  |  |
| Ly96      |  |  |  |  |  |  |
| Lynx1     |  |  |  |  |  |  |
| Lym2      |  |  |  |  |  |  |
| Lym5      |  |  |  |  |  |  |
| Lym7      |  |  |  |  |  |  |
| Lysmd4    |  |  |  |  |  |  |
| Lzic      |  |  |  |  |  |  |
| Lztf11    |  |  |  |  |  |  |
| Lzts2     |  |  |  |  |  |  |
| M6prbp1   |  |  |  |  |  |  |
| Macrodl   |  |  |  |  |  |  |
| Magi2     |  |  |  |  |  |  |
| Magi3     |  |  |  |  |  |  |
| Magix     |  |  |  |  |  |  |
| Mak10     |  |  |  |  |  |  |
| Man2a2    |  |  |  |  |  |  |
| Manba     |  |  |  |  |  |  |
| Maob      |  |  |  |  |  |  |
| Map1lc3a  |  |  |  |  |  |  |
| Map1lc3b  |  |  |  |  |  |  |
| Map2k2    |  |  |  |  |  |  |
| Map2k5    |  |  |  |  |  |  |
| Map3k5    |  |  |  |  |  |  |
| Map3k7ip1 |  |  |  |  |  |  |
| Map4k2    |  |  |  |  |  |  |
| Mapk10    |  |  |  |  |  |  |
| Mapk1ip1  |  |  |  |  |  |  |
| Mapkap1   |  |  |  |  |  |  |
| Mapkap3   |  |  |  |  |  |  |
| Mapksp1   |  |  |  |  |  |  |
| Mapre2    |  |  |  |  |  |  |
| Mapt      |  |  |  |  |  |  |
| Marveld1  |  |  |  |  |  |  |
| Mat2b     |  |  |  |  |  |  |
| Matn2     |  |  |  |  |  |  |
| Mavs      |  |  |  |  |  |  |
| Mb        |  |  |  |  |  |  |
| Mcc       |  |  |  |  |  |  |
| Mccc1     |  |  |  |  |  |  |
| Mccc2     |  |  |  |  |  |  |
| Mcee      |  |  |  |  |  |  |
| Mchr1     |  |  |  |  |  |  |
| Mcoln1    |  |  |  |  |  |  |
| Mcrs1     |  |  |  |  |  |  |
| Mdh1      |  |  |  |  |  |  |
| Mdh2      |  |  |  |  |  |  |
| Me3       |  |  |  |  |  |  |
| Meer      |  |  |  |  |  |  |
| Med12l    |  |  |  |  |  |  |
| Med16     |  |  |  |  |  |  |
| Med24     |  |  |  |  |  |  |
| Med31     |  |  |  |  |  |  |
| Mef2a     |  |  |  |  |  |  |

|          |  |  |  |  |  |  |
|----------|--|--|--|--|--|--|
| Mef2c    |  |  |  |  |  |  |
| Meis2    |  |  |  |  |  |  |
| Meox2    |  |  |  |  |  |  |
| Mepce    |  |  |  |  |  |  |
| Mett11d1 |  |  |  |  |  |  |
| Mett5d1  |  |  |  |  |  |  |
| Mettl3   |  |  |  |  |  |  |
| Mettl4   |  |  |  |  |  |  |
| Mff      |  |  |  |  |  |  |
| Mfn1     |  |  |  |  |  |  |
| Mfn2     |  |  |  |  |  |  |
| Mfsd11   |  |  |  |  |  |  |
| Mfsd6    |  |  |  |  |  |  |
| Mfsd7c   |  |  |  |  |  |  |
| Mfsd8    |  |  |  |  |  |  |
| Mgat4b   |  |  |  |  |  |  |
| Mgea5    |  |  |  |  |  |  |
| Mgl2     |  |  |  |  |  |  |
| Mgst3    |  |  |  |  |  |  |
| Mib2     |  |  |  |  |  |  |
| Mid1p1   |  |  |  |  |  |  |
| Mier3    |  |  |  |  |  |  |
| Mill2    |  |  |  |  |  |  |
| Mitf     |  |  |  |  |  |  |
| Mkks     |  |  |  |  |  |  |
| Mkrm2    |  |  |  |  |  |  |
| Mlec     |  |  |  |  |  |  |
| Mlf1     |  |  |  |  |  |  |
| Mlh1     |  |  |  |  |  |  |
| Mlh3     |  |  |  |  |  |  |
| Mll1     |  |  |  |  |  |  |
| Mll3     |  |  |  |  |  |  |
| Mllt3    |  |  |  |  |  |  |
| Mllt6    |  |  |  |  |  |  |
| Mmachc   |  |  |  |  |  |  |
| Mmgt1    |  |  |  |  |  |  |
| Mmp15    |  |  |  |  |  |  |
| Mn1      |  |  |  |  |  |  |
| Morn2    |  |  |  |  |  |  |
| Mosc2    |  |  |  |  |  |  |
| Mospd1   |  |  |  |  |  |  |
| Mov10l1  |  |  |  |  |  |  |
| Mpa2l    |  |  |  |  |  |  |
| Mpdz     |  |  |  |  |  |  |
| Mpi      |  |  |  |  |  |  |
| Mpnd     |  |  |  |  |  |  |
| Mpped2   |  |  |  |  |  |  |
| Mpv17    |  |  |  |  |  |  |
| Mpv17l2  |  |  |  |  |  |  |
| Mr1      |  |  |  |  |  |  |
| Mras     |  |  |  |  |  |  |
| Mreg     |  |  |  |  |  |  |
| Mrp63    |  |  |  |  |  |  |
| Mrpl1    |  |  |  |  |  |  |
| Mrpl11   |  |  |  |  |  |  |
| Mrpl12   |  |  |  |  |  |  |
| Mrpl14   |  |  |  |  |  |  |
| Mrpl15   |  |  |  |  |  |  |
| Mrpl16   |  |  |  |  |  |  |
| Mrpl18   |  |  |  |  |  |  |
| Mrpl19   |  |  |  |  |  |  |
| Mrpl21   |  |  |  |  |  |  |
| Mrpl24   |  |  |  |  |  |  |
| Mrpl27   |  |  |  |  |  |  |
| Mrpl28   |  |  |  |  |  |  |
| Mrpl3    |  |  |  |  |  |  |
| Mrpl30   |  |  |  |  |  |  |
| Mrpl34   |  |  |  |  |  |  |
| Mrpl35   |  |  |  |  |  |  |

|         |  |  |  |  |  |  |
|---------|--|--|--|--|--|--|
| Mrpl36  |  |  |  |  |  |  |
| Mrpl38  |  |  |  |  |  |  |
| Mrpl39  |  |  |  |  |  |  |
| Mrpl41  |  |  |  |  |  |  |
| Mrpl44  |  |  |  |  |  |  |
| Mrpl46  |  |  |  |  |  |  |
| Mrpl47  |  |  |  |  |  |  |
| Mrpl48  |  |  |  |  |  |  |
| Mrpl49  |  |  |  |  |  |  |
| Mrpl54  |  |  |  |  |  |  |
| Mrpl55  |  |  |  |  |  |  |
| Mrps14  |  |  |  |  |  |  |
| Mrps15  |  |  |  |  |  |  |
| Mrps17  |  |  |  |  |  |  |
| Mrps18a |  |  |  |  |  |  |
| Mrps21  |  |  |  |  |  |  |
| Mrps23  |  |  |  |  |  |  |
| Mrps24  |  |  |  |  |  |  |
| Mrps25  |  |  |  |  |  |  |
| Mrps27  |  |  |  |  |  |  |
| Mrps28  |  |  |  |  |  |  |
| Mrps30  |  |  |  |  |  |  |
| Mrps31  |  |  |  |  |  |  |
| Mrps36  |  |  |  |  |  |  |
| Mrps5   |  |  |  |  |  |  |
| Mrps6   |  |  |  |  |  |  |
| Mrs2    |  |  |  |  |  |  |
| Msh2    |  |  |  |  |  |  |
| Msh3    |  |  |  |  |  |  |
| Msl3    |  |  |  |  |  |  |
| Msrb2   |  |  |  |  |  |  |
| Mtap4   |  |  |  |  |  |  |
| Mtap7d1 |  |  |  |  |  |  |
| Mtch2   |  |  |  |  |  |  |
| Mtcp1   |  |  |  |  |  |  |
| Mterfd1 |  |  |  |  |  |  |
| Mterfd3 |  |  |  |  |  |  |
| Mtfr1   |  |  |  |  |  |  |
| Mtif2   |  |  |  |  |  |  |
| Mtif3   |  |  |  |  |  |  |
| Mto1    |  |  |  |  |  |  |
| Mtr     |  |  |  |  |  |  |
| Mtrf1   |  |  |  |  |  |  |
| Mtrf11  |  |  |  |  |  |  |
| Mtss1   |  |  |  |  |  |  |
| Mtus1   |  |  |  |  |  |  |
| Mus81   |  |  |  |  |  |  |
| Mut     |  |  |  |  |  |  |
| Muted   |  |  |  |  |  |  |
| Myadml2 |  |  |  |  |  |  |
| Mybpc2  |  |  |  |  |  |  |
| Mybpc3  |  |  |  |  |  |  |
| Myeov2  |  |  |  |  |  |  |
| Myh11   |  |  |  |  |  |  |
| Myh14   |  |  |  |  |  |  |
| Myh6    |  |  |  |  |  |  |
| Myh7    |  |  |  |  |  |  |
| Myl1    |  |  |  |  |  |  |
| Myl2    |  |  |  |  |  |  |
| Myl3    |  |  |  |  |  |  |
| Mylip   |  |  |  |  |  |  |
| Mylk3   |  |  |  |  |  |  |
| Mylk4   |  |  |  |  |  |  |
| Myo18a  |  |  |  |  |  |  |
| Myo6    |  |  |  |  |  |  |
| Myoc    |  |  |  |  |  |  |
| Myom1   |  |  |  |  |  |  |
| Myom2   |  |  |  |  |  |  |
| Myoz2   |  |  |  |  |  |  |

|            |  |  |  |  |  |  |
|------------|--|--|--|--|--|--|
| Myst1      |  |  |  |  |  |  |
| Myst4      |  |  |  |  |  |  |
| N6amt2     |  |  |  |  |  |  |
| Naaa       |  |  |  |  |  |  |
| Nagpa      |  |  |  |  |  |  |
| Napa       |  |  |  |  |  |  |
| Narf       |  |  |  |  |  |  |
| Narf1      |  |  |  |  |  |  |
| Nars2      |  |  |  |  |  |  |
| Nat15      |  |  |  |  |  |  |
| Nat6       |  |  |  |  |  |  |
| Nat9       |  |  |  |  |  |  |
| Nbas       |  |  |  |  |  |  |
| Nbea       |  |  |  |  |  |  |
| Nbeal1     |  |  |  |  |  |  |
| Ncald      |  |  |  |  |  |  |
| Ncapd3     |  |  |  |  |  |  |
| Ncbp2      |  |  |  |  |  |  |
| Ncoa1      |  |  |  |  |  |  |
| Ncoa2      |  |  |  |  |  |  |
| Ncrna00153 |  |  |  |  |  |  |
| Ndrg2      |  |  |  |  |  |  |
| Ndrg4      |  |  |  |  |  |  |
| Ndufa10    |  |  |  |  |  |  |
| Ndufa12    |  |  |  |  |  |  |
| Ndufa13    |  |  |  |  |  |  |
| Ndufa2     |  |  |  |  |  |  |
| Ndufa3     |  |  |  |  |  |  |
| Ndufa4     |  |  |  |  |  |  |
| Ndufa6     |  |  |  |  |  |  |
| Ndufa7     |  |  |  |  |  |  |
| Ndufa8     |  |  |  |  |  |  |
| Ndufa9     |  |  |  |  |  |  |
| Ndufab1    |  |  |  |  |  |  |
| Ndufaf1    |  |  |  |  |  |  |
| Ndufaf2    |  |  |  |  |  |  |
| Ndufaf3    |  |  |  |  |  |  |
| Ndufb10    |  |  |  |  |  |  |
| Ndufb11    |  |  |  |  |  |  |
| Ndufb5     |  |  |  |  |  |  |
| Ndufb6     |  |  |  |  |  |  |
| Ndufb7     |  |  |  |  |  |  |
| Ndufb8     |  |  |  |  |  |  |
| Ndufb9     |  |  |  |  |  |  |
| Ndufc1     |  |  |  |  |  |  |
| Ndufc2     |  |  |  |  |  |  |
| Ndufs1     |  |  |  |  |  |  |
| Ndufs2     |  |  |  |  |  |  |
| Ndufs3     |  |  |  |  |  |  |
| Ndufs4     |  |  |  |  |  |  |
| Ndufs5     |  |  |  |  |  |  |
| Ndufs6     |  |  |  |  |  |  |
| Ndufs7     |  |  |  |  |  |  |
| Ndufs8     |  |  |  |  |  |  |
| Ndufv1     |  |  |  |  |  |  |
| Ndufv2     |  |  |  |  |  |  |
| Nebi       |  |  |  |  |  |  |
| Nedd1      |  |  |  |  |  |  |
| Nedd4      |  |  |  |  |  |  |
| Nek1       |  |  |  |  |  |  |
| Neo1       |  |  |  |  |  |  |
| Nepn       |  |  |  |  |  |  |
| Nexn       |  |  |  |  |  |  |
| Nfate2     |  |  |  |  |  |  |
| Nfia       |  |  |  |  |  |  |
| Nfib       |  |  |  |  |  |  |
| Nfix       |  |  |  |  |  |  |
| Nful       |  |  |  |  |  |  |
| Nfyc       |  |  |  |  |  |  |

|         |  |  |  |  |  |  |
|---------|--|--|--|--|--|--|
| Nhlre2  |  |  |  |  |  |  |
| Nhsl1   |  |  |  |  |  |  |
| Nicn1   |  |  |  |  |  |  |
| Nipa1   |  |  |  |  |  |  |
| Nipal3  |  |  |  |  |  |  |
| Nit2    |  |  |  |  |  |  |
| Nkx2-5  |  |  |  |  |  |  |
| Nlk     |  |  |  |  |  |  |
| Nlrp10  |  |  |  |  |  |  |
| Nme2    |  |  |  |  |  |  |
| Nme3    |  |  |  |  |  |  |
| Nme5    |  |  |  |  |  |  |
| Nme6    |  |  |  |  |  |  |
| Nmnat1  |  |  |  |  |  |  |
| Nnt     |  |  |  |  |  |  |
| Nod1    |  |  |  |  |  |  |
| Nos1ap  |  |  |  |  |  |  |
| Notch3  |  |  |  |  |  |  |
| Npepl1  |  |  |  |  |  |  |
| Nphp1   |  |  |  |  |  |  |
| Npr1    |  |  |  |  |  |  |
| Npr2    |  |  |  |  |  |  |
| Nqo2    |  |  |  |  |  |  |
| Nr0b2   |  |  |  |  |  |  |
| Nr1d2   |  |  |  |  |  |  |
| Nr2f6   |  |  |  |  |  |  |
| Nrbp2   |  |  |  |  |  |  |
| Nrd1    |  |  |  |  |  |  |
| Nrip2   |  |  |  |  |  |  |
| Nrp1    |  |  |  |  |  |  |
| Nrxn1   |  |  |  |  |  |  |
| Nsmaf   |  |  |  |  |  |  |
| Nsmce4a |  |  |  |  |  |  |
| Nsun4   |  |  |  |  |  |  |
| Nt5c1a  |  |  |  |  |  |  |
| Nt5c3   |  |  |  |  |  |  |
| Ntf3    |  |  |  |  |  |  |
| Ntn1    |  |  |  |  |  |  |
| Ntn4    |  |  |  |  |  |  |
| Ntsr2   |  |  |  |  |  |  |
| Nub1    |  |  |  |  |  |  |
| Nudt12  |  |  |  |  |  |  |
| Nudt13  |  |  |  |  |  |  |
| Nudt14  |  |  |  |  |  |  |
| Nudt19  |  |  |  |  |  |  |
| Nudt2   |  |  |  |  |  |  |
| Nudt22  |  |  |  |  |  |  |
| Nudt3   |  |  |  |  |  |  |
| Nudt6   |  |  |  |  |  |  |
| Nudt7   |  |  |  |  |  |  |
| Nudt8   |  |  |  |  |  |  |
| Numa1   |  |  |  |  |  |  |
| Nxt2    |  |  |  |  |  |  |
| Oat     |  |  |  |  |  |  |
| Oaz1    |  |  |  |  |  |  |
| Obscn   |  |  |  |  |  |  |
| Obsl1   |  |  |  |  |  |  |
| Ogdh    |  |  |  |  |  |  |
| Ogdhl   |  |  |  |  |  |  |
| Ogn     |  |  |  |  |  |  |
| Opa1    |  |  |  |  |  |  |
| Oplah   |  |  |  |  |  |  |
| Optn    |  |  |  |  |  |  |
| Ormdl1  |  |  |  |  |  |  |
| Osbp    |  |  |  |  |  |  |
| Osbpl1a |  |  |  |  |  |  |
| Osbpl2  |  |  |  |  |  |  |
| Osbpl6  |  |  |  |  |  |  |
| Osbpl8  |  |  |  |  |  |  |

|          |  |  |  |  |  |  |
|----------|--|--|--|--|--|--|
| Osgep    |  |  |  |  |  |  |
| Osgep11  |  |  |  |  |  |  |
| Ostm1    |  |  |  |  |  |  |
| Otud6b   |  |  |  |  |  |  |
| Oxa11    |  |  |  |  |  |  |
| Oxct1    |  |  |  |  |  |  |
| Oxnad1   |  |  |  |  |  |  |
| Oxsm     |  |  |  |  |  |  |
| P2rx4    |  |  |  |  |  |  |
| P2rx6    |  |  |  |  |  |  |
| P2ry14   |  |  |  |  |  |  |
| P4htm    |  |  |  |  |  |  |
| Pabpc4   |  |  |  |  |  |  |
| Pafah2   |  |  |  |  |  |  |
| Paics    |  |  |  |  |  |  |
| Paip1    |  |  |  |  |  |  |
| Paip2    |  |  |  |  |  |  |
| Palld    |  |  |  |  |  |  |
| Palm     |  |  |  |  |  |  |
| Pank4    |  |  |  |  |  |  |
| Papln    |  |  |  |  |  |  |
| Papolg   |  |  |  |  |  |  |
| Paqr4    |  |  |  |  |  |  |
| Paqr7    |  |  |  |  |  |  |
| Paqr9    |  |  |  |  |  |  |
| Pard3b   |  |  |  |  |  |  |
| Parp1    |  |  |  |  |  |  |
| Patz1    |  |  |  |  |  |  |
| Pbx1     |  |  |  |  |  |  |
| Pbxip1   |  |  |  |  |  |  |
| Pcbd2    |  |  |  |  |  |  |
| Pcca     |  |  |  |  |  |  |
| Pccb     |  |  |  |  |  |  |
| Pcdh18   |  |  |  |  |  |  |
| Pcdh19   |  |  |  |  |  |  |
| Pcdh7    |  |  |  |  |  |  |
| Pcdhga12 |  |  |  |  |  |  |
| Pcmt1    |  |  |  |  |  |  |
| Pcmt2    |  |  |  |  |  |  |
| Pcnt     |  |  |  |  |  |  |
| Pcolce2  |  |  |  |  |  |  |
| Pcp411   |  |  |  |  |  |  |
| Pcsk6    |  |  |  |  |  |  |
| Pcyox1   |  |  |  |  |  |  |
| Pdcd4    |  |  |  |  |  |  |
| Pde1c    |  |  |  |  |  |  |
| Pde3a    |  |  |  |  |  |  |
| Pde4c    |  |  |  |  |  |  |
| Pde4dip  |  |  |  |  |  |  |
| Pde6d    |  |  |  |  |  |  |
| Pde7b    |  |  |  |  |  |  |
| Pdgrfd   |  |  |  |  |  |  |
| Pdha1    |  |  |  |  |  |  |
| Pdhb     |  |  |  |  |  |  |
| Pdhx     |  |  |  |  |  |  |
| Pdk2     |  |  |  |  |  |  |
| Pdlim4   |  |  |  |  |  |  |
| Pds5b    |  |  |  |  |  |  |
| Pdss2    |  |  |  |  |  |  |
| Pdxk     |  |  |  |  |  |  |
| Pdzd2    |  |  |  |  |  |  |
| Pebp1    |  |  |  |  |  |  |
| Pepd     |  |  |  |  |  |  |
| Per3     |  |  |  |  |  |  |
| Pet112l  |  |  |  |  |  |  |
| Pex1     |  |  |  |  |  |  |
| Pex12    |  |  |  |  |  |  |
| Pex19    |  |  |  |  |  |  |
| Pex26    |  |  |  |  |  |  |

|          |  |  |  |  |  |  |
|----------|--|--|--|--|--|--|
| Pfkfb1   |  |  |  |  |  |  |
| Pfkfb2   |  |  |  |  |  |  |
| Pfkm     |  |  |  |  |  |  |
| Pfn2     |  |  |  |  |  |  |
| Pfn4     |  |  |  |  |  |  |
| Pgam2    |  |  |  |  |  |  |
| Pgap1    |  |  |  |  |  |  |
| Pgcp     |  |  |  |  |  |  |
| Pgm5     |  |  |  |  |  |  |
| Pgpep1   |  |  |  |  |  |  |
| Phactr2  |  |  |  |  |  |  |
| Phb      |  |  |  |  |  |  |
| Phf1     |  |  |  |  |  |  |
| Phf17    |  |  |  |  |  |  |
| Phf2011  |  |  |  |  |  |  |
| Phkb     |  |  |  |  |  |  |
| Phlpp    |  |  |  |  |  |  |
| Phospho2 |  |  |  |  |  |  |
| Phpt1    |  |  |  |  |  |  |
| Phtf2    |  |  |  |  |  |  |
| Phyh     |  |  |  |  |  |  |
| Phyhd1   |  |  |  |  |  |  |
| Phyhip   |  |  |  |  |  |  |
| Pibf1    |  |  |  |  |  |  |
| Pick1    |  |  |  |  |  |  |
| Pigg     |  |  |  |  |  |  |
| Pigs     |  |  |  |  |  |  |
| Pigy     |  |  |  |  |  |  |
| Pih1d1   |  |  |  |  |  |  |
| Pik3c2b  |  |  |  |  |  |  |
| Pik3r2   |  |  |  |  |  |  |
| Pik3r4   |  |  |  |  |  |  |
| Pip5k1b  |  |  |  |  |  |  |
| Pitpnc1  |  |  |  |  |  |  |
| Pja1     |  |  |  |  |  |  |
| Pkdcc    |  |  |  |  |  |  |
| Pkig     |  |  |  |  |  |  |
| Pknox2   |  |  |  |  |  |  |
| Pla2g16  |  |  |  |  |  |  |
| Pla2g4e  |  |  |  |  |  |  |
| Pla2g5   |  |  |  |  |  |  |
| Plag1    |  |  |  |  |  |  |
| Plbd1    |  |  |  |  |  |  |
| Plcb1    |  |  |  |  |  |  |
| Plce1    |  |  |  |  |  |  |
| Pld3     |  |  |  |  |  |  |
| Plekha5  |  |  |  |  |  |  |
| Plekha6  |  |  |  |  |  |  |
| Plekhh2  |  |  |  |  |  |  |
| Plekhh3  |  |  |  |  |  |  |
| Pln      |  |  |  |  |  |  |
| Plscr4   |  |  |  |  |  |  |
| Pltp     |  |  |  |  |  |  |
| Plxdc1   |  |  |  |  |  |  |
| Plxdc2   |  |  |  |  |  |  |
| Pm20d1   |  |  |  |  |  |  |
| Pm20d2   |  |  |  |  |  |  |
| Pmpcb    |  |  |  |  |  |  |
| Pnkf     |  |  |  |  |  |  |
| Pnpla7   |  |  |  |  |  |  |
| Pnpla8   |  |  |  |  |  |  |
| Pnrc2    |  |  |  |  |  |  |
| Podn     |  |  |  |  |  |  |
| Podxl    |  |  |  |  |  |  |
| Pogz     |  |  |  |  |  |  |
| Polb     |  |  |  |  |  |  |
| Poldip2  |  |  |  |  |  |  |
| Polg     |  |  |  |  |  |  |
| Poll     |  |  |  |  |  |  |



|          |  |  |  |  |  |  |
|----------|--|--|--|--|--|--|
| Polr2e   |  |  |  |  |  |  |
| Polr2j   |  |  |  |  |  |  |
| Polr3gl  |  |  |  |  |  |  |
| Polrmt   |  |  |  |  |  |  |
| Pon3     |  |  |  |  |  |  |
| Pot1a    |  |  |  |  |  |  |
| Ppa2     |  |  |  |  |  |  |
| Ppapdc3  |  |  |  |  |  |  |
| Ppara    |  |  |  |  |  |  |
| Ppargc1a |  |  |  |  |  |  |
| Ppfibp2  |  |  |  |  |  |  |
| Ppid     |  |  |  |  |  |  |
| Ppif     |  |  |  |  |  |  |
| Ppil1    |  |  |  |  |  |  |
| Ppm1k    |  |  |  |  |  |  |
| Ppm2c    |  |  |  |  |  |  |
| Ppox     |  |  |  |  |  |  |
| Ppp1r14c |  |  |  |  |  |  |
| Ppp1r16a |  |  |  |  |  |  |
| Ppp1r3a  |  |  |  |  |  |  |
| Ppp1r3c  |  |  |  |  |  |  |
| Ppp1r9a  |  |  |  |  |  |  |
| Ppp2r5a  |  |  |  |  |  |  |
| Ppp2r5d  |  |  |  |  |  |  |
| Ppp3cb   |  |  |  |  |  |  |
| Ppp3cc   |  |  |  |  |  |  |
| Ppp5c    |  |  |  |  |  |  |
| Ppt2     |  |  |  |  |  |  |
| Pptc7    |  |  |  |  |  |  |
| Prcc     |  |  |  |  |  |  |
| Prdm16   |  |  |  |  |  |  |
| Prdx2    |  |  |  |  |  |  |
| Prdx3    |  |  |  |  |  |  |
| Prei4    |  |  |  |  |  |  |
| Prelp    |  |  |  |  |  |  |
| Prepl    |  |  |  |  |  |  |
| Prex2    |  |  |  |  |  |  |
| Prickle3 |  |  |  |  |  |  |
| Prkaca   |  |  |  |  |  |  |
| Prkag1   |  |  |  |  |  |  |
| Prkce    |  |  |  |  |  |  |
| Prkcq    |  |  |  |  |  |  |
| Prkesh   |  |  |  |  |  |  |
| Prkd1    |  |  |  |  |  |  |
| Prkdc    |  |  |  |  |  |  |
| Prkra    |  |  |  |  |  |  |
| Prpf19   |  |  |  |  |  |  |
| Prps2    |  |  |  |  |  |  |
| Prpsap1  |  |  |  |  |  |  |
| Prpsap2  |  |  |  |  |  |  |
| Psap     |  |  |  |  |  |  |
| Psd3     |  |  |  |  |  |  |
| Psemb10  |  |  |  |  |  |  |
| Psemb9   |  |  |  |  |  |  |
| Psme1    |  |  |  |  |  |  |
| Psme2    |  |  |  |  |  |  |
| Psme4    |  |  |  |  |  |  |
| Psmg1    |  |  |  |  |  |  |
| Ptcd1    |  |  |  |  |  |  |
| Ptcd2    |  |  |  |  |  |  |
| Ptcd3    |  |  |  |  |  |  |
| Ptdss1   |  |  |  |  |  |  |
| Ptdss2   |  |  |  |  |  |  |
| Pter     |  |  |  |  |  |  |
| Ptges2   |  |  |  |  |  |  |
| Ptgr2    |  |  |  |  |  |  |
| Ptov1    |  |  |  |  |  |  |
| Ptpn14   |  |  |  |  |  |  |
| Ptpn2    |  |  |  |  |  |  |

|               |  |  |  |  |  |  |
|---------------|--|--|--|--|--|--|
| Ptpn3         |  |  |  |  |  |  |
| Ptprd         |  |  |  |  |  |  |
| Ptprm         |  |  |  |  |  |  |
| Ptprs         |  |  |  |  |  |  |
| Pwwp2b        |  |  |  |  |  |  |
| Pxmp3         |  |  |  |  |  |  |
| Pxmp4         |  |  |  |  |  |  |
| Pycl1         |  |  |  |  |  |  |
| Pygb          |  |  |  |  |  |  |
| Pygm          |  |  |  |  |  |  |
| Pyroxd1       |  |  |  |  |  |  |
| Qdpr          |  |  |  |  |  |  |
| Qpct          |  |  |  |  |  |  |
| Qser1         |  |  |  |  |  |  |
| R3hdm2        |  |  |  |  |  |  |
| RP23-195K8.6  |  |  |  |  |  |  |
| RP23-357I14.1 |  |  |  |  |  |  |
| Rab12         |  |  |  |  |  |  |
| Rab1b         |  |  |  |  |  |  |
| Rab22a        |  |  |  |  |  |  |
| Rab28         |  |  |  |  |  |  |
| Rab3a         |  |  |  |  |  |  |
| Rab3d         |  |  |  |  |  |  |
| Rab7          |  |  |  |  |  |  |
| Rab9          |  |  |  |  |  |  |
| Rabac1        |  |  |  |  |  |  |
| Rad1          |  |  |  |  |  |  |
| Rad23a        |  |  |  |  |  |  |
| Rad51l3       |  |  |  |  |  |  |
| Rad9b         |  |  |  |  |  |  |
| Raf1          |  |  |  |  |  |  |
| Rai2          |  |  |  |  |  |  |
| Ralgps2       |  |  |  |  |  |  |
| Rangrf        |  |  |  |  |  |  |
| Rapgef2       |  |  |  |  |  |  |
| Rapgef4       |  |  |  |  |  |  |
| Rasgrf2       |  |  |  |  |  |  |
| Rasgrp2       |  |  |  |  |  |  |
| Rasgrp3       |  |  |  |  |  |  |
| Raver2        |  |  |  |  |  |  |
| Rbbp9         |  |  |  |  |  |  |
| Rbl2          |  |  |  |  |  |  |
| Rbm10         |  |  |  |  |  |  |
| Rbm20         |  |  |  |  |  |  |
| Rbm38         |  |  |  |  |  |  |
| Rbpj          |  |  |  |  |  |  |
| Rc3h1         |  |  |  |  |  |  |
| Rcan2         |  |  |  |  |  |  |
| Rcbtb2        |  |  |  |  |  |  |
| Rcn2          |  |  |  |  |  |  |
| Rcor3         |  |  |  |  |  |  |
| Rcsd1         |  |  |  |  |  |  |
| Rdh13         |  |  |  |  |  |  |
| Rdh5          |  |  |  |  |  |  |
| Rdm1          |  |  |  |  |  |  |
| Reep1         |  |  |  |  |  |  |
| Rfe1          |  |  |  |  |  |  |
| Rfesd         |  |  |  |  |  |  |
| Rfk           |  |  |  |  |  |  |
| Rfwd3         |  |  |  |  |  |  |
| Rgl3          |  |  |  |  |  |  |
| Rgma          |  |  |  |  |  |  |
| Rgmb          |  |  |  |  |  |  |
| Rgs2          |  |  |  |  |  |  |
| Rgs5          |  |  |  |  |  |  |
| Rgs6          |  |  |  |  |  |  |
| Rhd           |  |  |  |  |  |  |
| Rhob          |  |  |  |  |  |  |
| Rhobtb2       |  |  |  |  |  |  |

|          |  |  |  |  |  |  |
|----------|--|--|--|--|--|--|
| Rhobtb3  |  |  |  |  |  |  |
| Rhot1    |  |  |  |  |  |  |
| Rhot2    |  |  |  |  |  |  |
| Ric8b    |  |  |  |  |  |  |
| Rilp     |  |  |  |  |  |  |
| Ring1    |  |  |  |  |  |  |
| Rmi1     |  |  |  |  |  |  |
| Rmnd5a   |  |  |  |  |  |  |
| Rnaseh2a |  |  |  |  |  |  |
| Rnasek   |  |  |  |  |  |  |
| Rnasen   |  |  |  |  |  |  |
| Rnaset2a |  |  |  |  |  |  |
| Rnf10    |  |  |  |  |  |  |
| Rnf114   |  |  |  |  |  |  |
| Rnf123   |  |  |  |  |  |  |
| Rnf13    |  |  |  |  |  |  |
| Rnf135   |  |  |  |  |  |  |
| Rnf14    |  |  |  |  |  |  |
| Rnf146   |  |  |  |  |  |  |
| Rnf150   |  |  |  |  |  |  |
| Rnf166   |  |  |  |  |  |  |
| Rnf167   |  |  |  |  |  |  |
| Rnf187   |  |  |  |  |  |  |
| Rnf207   |  |  |  |  |  |  |
| Rnf34    |  |  |  |  |  |  |
| Rnf8     |  |  |  |  |  |  |
| Rnls     |  |  |  |  |  |  |
| Rnpep    |  |  |  |  |  |  |
| Robld3   |  |  |  |  |  |  |
| Rogdi    |  |  |  |  |  |  |
| Romo1    |  |  |  |  |  |  |
| Rora     |  |  |  |  |  |  |
| Rpa1     |  |  |  |  |  |  |
| Rpa3     |  |  |  |  |  |  |
| Rpap3    |  |  |  |  |  |  |
| Rpgr     |  |  |  |  |  |  |
| Rpl31    |  |  |  |  |  |  |
| Rpl31    |  |  |  |  |  |  |
| Rpp40    |  |  |  |  |  |  |
| Rprd1a   |  |  |  |  |  |  |
| Rpusd4   |  |  |  |  |  |  |
| Rrad     |  |  |  |  |  |  |
| Rragb    |  |  |  |  |  |  |
| Rragd    |  |  |  |  |  |  |
| Rreb1    |  |  |  |  |  |  |
| Rrm2b    |  |  |  |  |  |  |
| Rsbn1l   |  |  |  |  |  |  |
| Rsh12a   |  |  |  |  |  |  |
| Rsl1     |  |  |  |  |  |  |
| Rtf1     |  |  |  |  |  |  |
| Rtn2     |  |  |  |  |  |  |
| Rtn3     |  |  |  |  |  |  |
| Rtn4ip1  |  |  |  |  |  |  |
| Rtp3     |  |  |  |  |  |  |
| Rttt     |  |  |  |  |  |  |
| Rufy1    |  |  |  |  |  |  |
| Rxra     |  |  |  |  |  |  |
| Rxrg     |  |  |  |  |  |  |
| Ryr2     |  |  |  |  |  |  |
| S100a1   |  |  |  |  |  |  |
| Samd12   |  |  |  |  |  |  |
| Sars2    |  |  |  |  |  |  |
| Sbk2     |  |  |  |  |  |  |
| Scand1   |  |  |  |  |  |  |
| Scaper   |  |  |  |  |  |  |
| Scarna17 |  |  |  |  |  |  |
| Scepdh   |  |  |  |  |  |  |
| Schip1   |  |  |  |  |  |  |
| Scin     |  |  |  |  |  |  |

|           |  |  |  |  |  |  |
|-----------|--|--|--|--|--|--|
| Sclt1     |  |  |  |  |  |  |
| Scly      |  |  |  |  |  |  |
| Scmh1     |  |  |  |  |  |  |
| Scn7a     |  |  |  |  |  |  |
| Sco1      |  |  |  |  |  |  |
| Sep2      |  |  |  |  |  |  |
| Scrn1     |  |  |  |  |  |  |
| Scrn3     |  |  |  |  |  |  |
| Scube2    |  |  |  |  |  |  |
| Sdf2      |  |  |  |  |  |  |
| Sdha      |  |  |  |  |  |  |
| Sdhb      |  |  |  |  |  |  |
| Sdhd      |  |  |  |  |  |  |
| Sdpr      |  |  |  |  |  |  |
| Sec14l1   |  |  |  |  |  |  |
| Selenbp1  |  |  |  |  |  |  |
| Selk      |  |  |  |  |  |  |
| Sema6a    |  |  |  |  |  |  |
| Sema6c    |  |  |  |  |  |  |
| Senp7     |  |  |  |  |  |  |
| Senp8     |  |  |  |  |  |  |
| Sepp1     |  |  |  |  |  |  |
| Sepw1     |  |  |  |  |  |  |
| Serac1    |  |  |  |  |  |  |
| Serf1     |  |  |  |  |  |  |
| Serf2     |  |  |  |  |  |  |
| Serinc5   |  |  |  |  |  |  |
| Serpinb9  |  |  |  |  |  |  |
| Serping1  |  |  |  |  |  |  |
| Serpini1  |  |  |  |  |  |  |
| Sesn1     |  |  |  |  |  |  |
| Sesn3     |  |  |  |  |  |  |
| Setbp1    |  |  |  |  |  |  |
| Setd3     |  |  |  |  |  |  |
| Setd8     |  |  |  |  |  |  |
| Sfrs12ip1 |  |  |  |  |  |  |
| Sfrs18    |  |  |  |  |  |  |
| Sft2d3    |  |  |  |  |  |  |
| Sfxn4     |  |  |  |  |  |  |
| Sgca      |  |  |  |  |  |  |
| Sgcb      |  |  |  |  |  |  |
| Sgcd      |  |  |  |  |  |  |
| Sgce      |  |  |  |  |  |  |
| Sgcg      |  |  |  |  |  |  |
| Sgol2     |  |  |  |  |  |  |
| Sgsm2     |  |  |  |  |  |  |
| Sgta      |  |  |  |  |  |  |
| Sh3bgr    |  |  |  |  |  |  |
| Sh3glb2   |  |  |  |  |  |  |
| Siae      |  |  |  |  |  |  |
| Sin3b     |  |  |  |  |  |  |
| Sipa1l2   |  |  |  |  |  |  |
| Sirt1     |  |  |  |  |  |  |
| Sirt2     |  |  |  |  |  |  |
| Sirt3     |  |  |  |  |  |  |
| Sirt4     |  |  |  |  |  |  |
| Sirt5     |  |  |  |  |  |  |
| Six4      |  |  |  |  |  |  |
| Six5      |  |  |  |  |  |  |
| Slc16a7   |  |  |  |  |  |  |
| Slc16a9   |  |  |  |  |  |  |
| Slc25a10  |  |  |  |  |  |  |
| Slc25a11  |  |  |  |  |  |  |
| Slc25a12  |  |  |  |  |  |  |
| Slc25a13  |  |  |  |  |  |  |
| Slc25a15  |  |  |  |  |  |  |
| Slc25a17  |  |  |  |  |  |  |
| Slc25a19  |  |  |  |  |  |  |
| Slc25a23  |  |  |  |  |  |  |

|          |  |  |  |  |  |  |
|----------|--|--|--|--|--|--|
| Slc25a27 |  |  |  |  |  |  |
| Slc25a3  |  |  |  |  |  |  |
| Slc25a33 |  |  |  |  |  |  |
| Slc25a36 |  |  |  |  |  |  |
| Slc25a39 |  |  |  |  |  |  |
| Slc25a4  |  |  |  |  |  |  |
| Slc26a10 |  |  |  |  |  |  |
| Slc27a1  |  |  |  |  |  |  |
| Slc28a2  |  |  |  |  |  |  |
| Slc29a1  |  |  |  |  |  |  |
| Slc2a12  |  |  |  |  |  |  |
| Slc2a8   |  |  |  |  |  |  |
| Slc30a9  |  |  |  |  |  |  |
| Slc31a2  |  |  |  |  |  |  |
| Slc35a1  |  |  |  |  |  |  |
| Slc36a2  |  |  |  |  |  |  |
| Slc37a1  |  |  |  |  |  |  |
| Slc37a4  |  |  |  |  |  |  |
| Slc38a11 |  |  |  |  |  |  |
| Slc38a3  |  |  |  |  |  |  |
| Slc38a7  |  |  |  |  |  |  |
| Slc38a9  |  |  |  |  |  |  |
| Slc41a1  |  |  |  |  |  |  |
| Slc41a3  |  |  |  |  |  |  |
| Slc46a1  |  |  |  |  |  |  |
| Slc47a1  |  |  |  |  |  |  |
| Slc9a3r2 |  |  |  |  |  |  |
| Slc9a6   |  |  |  |  |  |  |
| Slc9a9   |  |  |  |  |  |  |
| Slco2b1  |  |  |  |  |  |  |
| Slco3a1  |  |  |  |  |  |  |
| Slnf5    |  |  |  |  |  |  |
| Smarca2  |  |  |  |  |  |  |
| Smarca11 |  |  |  |  |  |  |
| Smardc3  |  |  |  |  |  |  |
| Smpd1    |  |  |  |  |  |  |
| Smpd2    |  |  |  |  |  |  |
| Smpd13a  |  |  |  |  |  |  |
| Smtnl2   |  |  |  |  |  |  |
| Smyd1    |  |  |  |  |  |  |
| Smyd3    |  |  |  |  |  |  |
| Snai2    |  |  |  |  |  |  |
| Snape1   |  |  |  |  |  |  |
| Snape5   |  |  |  |  |  |  |
| Snapi    |  |  |  |  |  |  |
| Sned1    |  |  |  |  |  |  |
| Snrnp27  |  |  |  |  |  |  |
| Snx16    |  |  |  |  |  |  |
| Snx21    |  |  |  |  |  |  |
| Snx27    |  |  |  |  |  |  |
| Snx32    |  |  |  |  |  |  |
| Snx33    |  |  |  |  |  |  |
| Sobp     |  |  |  |  |  |  |
| Socs2    |  |  |  |  |  |  |
| Sod2     |  |  |  |  |  |  |
| Sorbs1   |  |  |  |  |  |  |
| Sorcs2   |  |  |  |  |  |  |
| Sord     |  |  |  |  |  |  |
| Sox6     |  |  |  |  |  |  |
| Sp100    |  |  |  |  |  |  |
| Sp4      |  |  |  |  |  |  |
| Spa17    |  |  |  |  |  |  |
| Spag7    |  |  |  |  |  |  |
| Spata1   |  |  |  |  |  |  |
| Spc24    |  |  |  |  |  |  |
| Spna1    |  |  |  |  |  |  |
| Spnb1    |  |  |  |  |  |  |
| Spns1    |  |  |  |  |  |  |
| Sqrdl    |  |  |  |  |  |  |

|            |  |  |  |  |  |  |
|------------|--|--|--|--|--|--|
| Srd5a2l2   |  |  |  |  |  |  |
| Srl        |  |  |  |  |  |  |
| Srpk2      |  |  |  |  |  |  |
| Srpk3      |  |  |  |  |  |  |
| Srpx       |  |  |  |  |  |  |
| Srr        |  |  |  |  |  |  |
| Ssbp1      |  |  |  |  |  |  |
| Ssbp2      |  |  |  |  |  |  |
| Sspn       |  |  |  |  |  |  |
| St3gal3    |  |  |  |  |  |  |
| St3gal4    |  |  |  |  |  |  |
| St3gal5    |  |  |  |  |  |  |
| St3gal6    |  |  |  |  |  |  |
| St5        |  |  |  |  |  |  |
| St6galnac2 |  |  |  |  |  |  |
| St6galnac6 |  |  |  |  |  |  |
| St7l       |  |  |  |  |  |  |
| Stard3     |  |  |  |  |  |  |
| Stard8     |  |  |  |  |  |  |
| Stard9     |  |  |  |  |  |  |
| Stat5b     |  |  |  |  |  |  |
| Stau2      |  |  |  |  |  |  |
| Stc2       |  |  |  |  |  |  |
| Steap3     |  |  |  |  |  |  |
| Steap4     |  |  |  |  |  |  |
| Stk11      |  |  |  |  |  |  |
| Stk16      |  |  |  |  |  |  |
| Stk39      |  |  |  |  |  |  |
| Stmn1      |  |  |  |  |  |  |
| Stom       |  |  |  |  |  |  |
| Stradb     |  |  |  |  |  |  |
| Strbp      |  |  |  |  |  |  |
| Stub1      |  |  |  |  |  |  |
| Stx17      |  |  |  |  |  |  |
| Stxbp4     |  |  |  |  |  |  |
| Stxbp6     |  |  |  |  |  |  |
| Sucla2     |  |  |  |  |  |  |
| Suds3      |  |  |  |  |  |  |
| Suox       |  |  |  |  |  |  |
| Supv3l1    |  |  |  |  |  |  |
| Surf1      |  |  |  |  |  |  |
| Svil       |  |  |  |  |  |  |
| Svip       |  |  |  |  |  |  |
| Syde2      |  |  |  |  |  |  |
| Sympk      |  |  |  |  |  |  |
| Sync       |  |  |  |  |  |  |
| Syne1      |  |  |  |  |  |  |
| Syne2      |  |  |  |  |  |  |
| Syngr1     |  |  |  |  |  |  |
| Syngr2     |  |  |  |  |  |  |
| Synj2      |  |  |  |  |  |  |
| Synpo2     |  |  |  |  |  |  |
| Tac1       |  |  |  |  |  |  |
| Tada2l     |  |  |  |  |  |  |
| Taf12      |  |  |  |  |  |  |
| Taf4a      |  |  |  |  |  |  |
| Taf6       |  |  |  |  |  |  |
| Tars2      |  |  |  |  |  |  |
| Taz        |  |  |  |  |  |  |
| Tbcd17     |  |  |  |  |  |  |
| Tbcd19     |  |  |  |  |  |  |
| Tbcd22a    |  |  |  |  |  |  |
| Tbcd4      |  |  |  |  |  |  |
| Tbcd7      |  |  |  |  |  |  |
| Tbccd1     |  |  |  |  |  |  |
| Tbx20      |  |  |  |  |  |  |
| Tbx3       |  |  |  |  |  |  |
| Tbx5       |  |  |  |  |  |  |
| Tcap       |  |  |  |  |  |  |

|          |  |  |  |  |  |  |
|----------|--|--|--|--|--|--|
| Tcea3    |  |  |  |  |  |  |
| Tceall   |  |  |  |  |  |  |
| Tcf21    |  |  |  |  |  |  |
| Tcfcp2   |  |  |  |  |  |  |
| Tcfef    |  |  |  |  |  |  |
| Tcn2     |  |  |  |  |  |  |
| Tcp1112  |  |  |  |  |  |  |
| Tcta     |  |  |  |  |  |  |
| Tctn3    |  |  |  |  |  |  |
| Tec      |  |  |  |  |  |  |
| Tef      |  |  |  |  |  |  |
| Tek      |  |  |  |  |  |  |
| Tesc     |  |  |  |  |  |  |
| Tesk2    |  |  |  |  |  |  |
| Tex261   |  |  |  |  |  |  |
| Tfb2m    |  |  |  |  |  |  |
| Tfpi     |  |  |  |  |  |  |
| Tgfr3    |  |  |  |  |  |  |
| Tha1     |  |  |  |  |  |  |
| Thap4    |  |  |  |  |  |  |
| Thap6    |  |  |  |  |  |  |
| Thoc7    |  |  |  |  |  |  |
| Thra     |  |  |  |  |  |  |
| Tiaf2    |  |  |  |  |  |  |
| Tie1     |  |  |  |  |  |  |
| Timm17b  |  |  |  |  |  |  |
| Timm22   |  |  |  |  |  |  |
| Timm23   |  |  |  |  |  |  |
| Timm44   |  |  |  |  |  |  |
| Timm8b   |  |  |  |  |  |  |
| Timp2    |  |  |  |  |  |  |
| Tlcd1    |  |  |  |  |  |  |
| Tle2     |  |  |  |  |  |  |
| Tln2     |  |  |  |  |  |  |
| Tm7sf3   |  |  |  |  |  |  |
| Tm9sf2   |  |  |  |  |  |  |
| Tmbim4   |  |  |  |  |  |  |
| Tmc7     |  |  |  |  |  |  |
| Tmco1    |  |  |  |  |  |  |
| Tmco3    |  |  |  |  |  |  |
| Tmed1    |  |  |  |  |  |  |
| Tmem106b |  |  |  |  |  |  |
| Tmem106c |  |  |  |  |  |  |
| Tmem109  |  |  |  |  |  |  |
| Tmem116  |  |  |  |  |  |  |
| Tmem117  |  |  |  |  |  |  |
| Tmem126a |  |  |  |  |  |  |
| Tmem126b |  |  |  |  |  |  |
| Tmem129  |  |  |  |  |  |  |
| Tmem135  |  |  |  |  |  |  |
| Tmem140  |  |  |  |  |  |  |
| Tmem141  |  |  |  |  |  |  |
| Tmem143  |  |  |  |  |  |  |
| Tmem147  |  |  |  |  |  |  |
| Tmem175  |  |  |  |  |  |  |
| Tmem195  |  |  |  |  |  |  |
| Tmem201  |  |  |  |  |  |  |
| Tmem204  |  |  |  |  |  |  |
| Tmem205  |  |  |  |  |  |  |
| Tmem218  |  |  |  |  |  |  |
| Tmem223  |  |  |  |  |  |  |
| Tmem25   |  |  |  |  |  |  |
| Tmem35   |  |  |  |  |  |  |
| Tmem42   |  |  |  |  |  |  |
| Tmem44   |  |  |  |  |  |  |
| Tmem47   |  |  |  |  |  |  |
| Tmem48   |  |  |  |  |  |  |
| Tmem50a  |  |  |  |  |  |  |
| Tmem50b  |  |  |  |  |  |  |

|           |  |  |  |  |  |  |
|-----------|--|--|--|--|--|--|
| Tmem56    |  |  |  |  |  |  |
| Tmem59    |  |  |  |  |  |  |
| Tmem63b   |  |  |  |  |  |  |
| Tmem64    |  |  |  |  |  |  |
| Tmem65    |  |  |  |  |  |  |
| Tmem69    |  |  |  |  |  |  |
| Tmem70    |  |  |  |  |  |  |
| Tmem77    |  |  |  |  |  |  |
| Tmem80    |  |  |  |  |  |  |
| Tmem82    |  |  |  |  |  |  |
| Tmem85    |  |  |  |  |  |  |
| Tmem98    |  |  |  |  |  |  |
| Tmod1     |  |  |  |  |  |  |
| Tmod4     |  |  |  |  |  |  |
| Tmtc1     |  |  |  |  |  |  |
| Tmtc2     |  |  |  |  |  |  |
| Tnfaip8   |  |  |  |  |  |  |
| Tnip3     |  |  |  |  |  |  |
| Tnni3     |  |  |  |  |  |  |
| Tnni3k    |  |  |  |  |  |  |
| Tnrc6b    |  |  |  |  |  |  |
| Tnrc6c    |  |  |  |  |  |  |
| Tnxb      |  |  |  |  |  |  |
| Tob2      |  |  |  |  |  |  |
| Tom111    |  |  |  |  |  |  |
| Tom112    |  |  |  |  |  |  |
| Tomm34    |  |  |  |  |  |  |
| Tomm401   |  |  |  |  |  |  |
| Tomm5     |  |  |  |  |  |  |
| Tpcn1     |  |  |  |  |  |  |
| Tpmt      |  |  |  |  |  |  |
| Tpp1      |  |  |  |  |  |  |
| Tppp      |  |  |  |  |  |  |
| Tppp3     |  |  |  |  |  |  |
| Tprgl     |  |  |  |  |  |  |
| Tra2a     |  |  |  |  |  |  |
| Traf3ip1  |  |  |  |  |  |  |
| Trak1     |  |  |  |  |  |  |
| Trap1     |  |  |  |  |  |  |
| Trappc2   |  |  |  |  |  |  |
| Trappc21  |  |  |  |  |  |  |
| Trappc9   |  |  |  |  |  |  |
| Trib2     |  |  |  |  |  |  |
| Trim12    |  |  |  |  |  |  |
| Trim32    |  |  |  |  |  |  |
| Trim55    |  |  |  |  |  |  |
| Trim63    |  |  |  |  |  |  |
| Trim65    |  |  |  |  |  |  |
| Trim68    |  |  |  |  |  |  |
| Trim72    |  |  |  |  |  |  |
| Trmt2b    |  |  |  |  |  |  |
| Trmt5     |  |  |  |  |  |  |
| Trmu      |  |  |  |  |  |  |
| Trnt1     |  |  |  |  |  |  |
| Trp53inp2 |  |  |  |  |  |  |
| Trpc1     |  |  |  |  |  |  |
| Trpc2     |  |  |  |  |  |  |
| Trpc3     |  |  |  |  |  |  |
| Trpm4     |  |  |  |  |  |  |
| Trpt1     |  |  |  |  |  |  |
| Tsc1      |  |  |  |  |  |  |
| Tsc2      |  |  |  |  |  |  |
| Tsc22d4   |  |  |  |  |  |  |
| Tsen34    |  |  |  |  |  |  |
| Tsfm      |  |  |  |  |  |  |
| Tsgal0ip  |  |  |  |  |  |  |
| Tspan12   |  |  |  |  |  |  |
| Tspan13   |  |  |  |  |  |  |
| Tspan3    |  |  |  |  |  |  |



|         |  |  |  |  |  |  |
|---------|--|--|--|--|--|--|
| Tspan7  |  |  |  |  |  |  |
| Tspyl4  |  |  |  |  |  |  |
| Ttc12   |  |  |  |  |  |  |
| Ttc19   |  |  |  |  |  |  |
| Ttc21b  |  |  |  |  |  |  |
| Ttc3    |  |  |  |  |  |  |
| Ttc30a2 |  |  |  |  |  |  |
| Ttc30b  |  |  |  |  |  |  |
| Ttc32   |  |  |  |  |  |  |
| Ttc35   |  |  |  |  |  |  |
| Ttl11   |  |  |  |  |  |  |
| Ttl15   |  |  |  |  |  |  |
| Ttn     |  |  |  |  |  |  |
| Tubd1   |  |  |  |  |  |  |
| Tubg1   |  |  |  |  |  |  |
| Tufm    |  |  |  |  |  |  |
| Tusc4   |  |  |  |  |  |  |
| Twf2    |  |  |  |  |  |  |
| Twsg1   |  |  |  |  |  |  |
| Txlnb   |  |  |  |  |  |  |
| Txn2    |  |  |  |  |  |  |
| Txndc14 |  |  |  |  |  |  |
| Txndc15 |  |  |  |  |  |  |
| Txndc16 |  |  |  |  |  |  |
| U2af114 |  |  |  |  |  |  |
| Uba52   |  |  |  |  |  |  |
| Ube1y1  |  |  |  |  |  |  |
| Ube2a   |  |  |  |  |  |  |
| Ube2b   |  |  |  |  |  |  |
| Ube2d1  |  |  |  |  |  |  |
| Ube2e3  |  |  |  |  |  |  |
| Ube2l3  |  |  |  |  |  |  |
| Ube2r2  |  |  |  |  |  |  |
| Ube2v2  |  |  |  |  |  |  |
| Ubl4    |  |  |  |  |  |  |
| Ubl5    |  |  |  |  |  |  |
| Ubl7    |  |  |  |  |  |  |
| Ubr7    |  |  |  |  |  |  |
| Ubxn2b  |  |  |  |  |  |  |
| Ubxn6   |  |  |  |  |  |  |
| Uck11   |  |  |  |  |  |  |
| Uhrf2   |  |  |  |  |  |  |
| Ulk1    |  |  |  |  |  |  |
| Ulk2    |  |  |  |  |  |  |
| Unc84a  |  |  |  |  |  |  |
| Uqcc    |  |  |  |  |  |  |
| Uqcr    |  |  |  |  |  |  |
| Uqcrb   |  |  |  |  |  |  |
| Uqcrc1  |  |  |  |  |  |  |
| Uqcrc2  |  |  |  |  |  |  |
| Uqcrfs1 |  |  |  |  |  |  |
| Uqcrh   |  |  |  |  |  |  |
| Uqcrq   |  |  |  |  |  |  |
| Urod    |  |  |  |  |  |  |
| Use1    |  |  |  |  |  |  |
| Usf2    |  |  |  |  |  |  |
| Ushbp1  |  |  |  |  |  |  |
| Usmg5   |  |  |  |  |  |  |
| Usp11   |  |  |  |  |  |  |
| Usp13   |  |  |  |  |  |  |
| Usp15   |  |  |  |  |  |  |
| Usp2    |  |  |  |  |  |  |
| Usp21   |  |  |  |  |  |  |
| Usp24   |  |  |  |  |  |  |
| Usp46   |  |  |  |  |  |  |
| Uty     |  |  |  |  |  |  |
| V1rd20  |  |  |  |  |  |  |
| Vdac1   |  |  |  |  |  |  |
| Vdac3   |  |  |  |  |  |  |

|          |  |  |  |  |  |  |
|----------|--|--|--|--|--|--|
| Vegfb    |  |  |  |  |  |  |
| Vezt     |  |  |  |  |  |  |
| Vit      |  |  |  |  |  |  |
| Vldlr    |  |  |  |  |  |  |
| Vmn2r111 |  |  |  |  |  |  |
| Vps13a   |  |  |  |  |  |  |
| Vps13c   |  |  |  |  |  |  |
| Vps13d   |  |  |  |  |  |  |
| Vps25    |  |  |  |  |  |  |
| Vps28    |  |  |  |  |  |  |
| Vps52    |  |  |  |  |  |  |
| Vps72    |  |  |  |  |  |  |
| Vrk2     |  |  |  |  |  |  |
| Vtn      |  |  |  |  |  |  |
| Wbp1     |  |  |  |  |  |  |
| Wbscr16  |  |  |  |  |  |  |
| Wbscr17  |  |  |  |  |  |  |
| Wdr18    |  |  |  |  |  |  |
| Wdr21    |  |  |  |  |  |  |
| Wdr23    |  |  |  |  |  |  |
| Wdr24    |  |  |  |  |  |  |
| Wdr35    |  |  |  |  |  |  |
| Wdr41    |  |  |  |  |  |  |
| Wdr45    |  |  |  |  |  |  |
| Wdr48    |  |  |  |  |  |  |
| Wdr53    |  |  |  |  |  |  |
| Wdr6     |  |  |  |  |  |  |
| Wdr67    |  |  |  |  |  |  |
| Wdr7     |  |  |  |  |  |  |
| Wdr92    |  |  |  |  |  |  |
| Wdsub1   |  |  |  |  |  |  |
| Wdyhv1   |  |  |  |  |  |  |
| Wfdc6a   |  |  |  |  |  |  |
| Whrn     |  |  |  |  |  |  |
| Wipf3    |  |  |  |  |  |  |
| Wnk1     |  |  |  |  |  |  |
| Wnk2     |  |  |  |  |  |  |
| Wnk4     |  |  |  |  |  |  |
| Wrap53   |  |  |  |  |  |  |
| Wrb      |  |  |  |  |  |  |
| Wwp1     |  |  |  |  |  |  |
| Xdh      |  |  |  |  |  |  |
| Xpo7     |  |  |  |  |  |  |
| Xrcc1    |  |  |  |  |  |  |
| Xrcc4    |  |  |  |  |  |  |
| Xrcc5    |  |  |  |  |  |  |
| Xrcc6    |  |  |  |  |  |  |
| Ybx1     |  |  |  |  |  |  |
| Yif1a    |  |  |  |  |  |  |
| Yipf2    |  |  |  |  |  |  |
| Yipf3    |  |  |  |  |  |  |
| Yipf7    |  |  |  |  |  |  |
| Ypel3    |  |  |  |  |  |  |
| Zbtb20   |  |  |  |  |  |  |
| Zbtb4    |  |  |  |  |  |  |
| Zc3h7b   |  |  |  |  |  |  |
| Zcche17  |  |  |  |  |  |  |
| Zdhhc1   |  |  |  |  |  |  |
| Zdhhc17  |  |  |  |  |  |  |
| Zer1     |  |  |  |  |  |  |
| Zfand1   |  |  |  |  |  |  |
| Zfand6   |  |  |  |  |  |  |
| Zfp106   |  |  |  |  |  |  |
| Zfp110   |  |  |  |  |  |  |
| Zfp113   |  |  |  |  |  |  |
| Zfp128   |  |  |  |  |  |  |
| Zfp148   |  |  |  |  |  |  |
| Zfp157   |  |  |  |  |  |  |
| Zfp160   |  |  |  |  |  |  |

|            |  |  |  |  |  |  |
|------------|--|--|--|--|--|--|
| Zfp161     |  |  |  |  |  |  |
| Zfp180     |  |  |  |  |  |  |
| Zfp187     |  |  |  |  |  |  |
| Zfp189     |  |  |  |  |  |  |
| Zfp191     |  |  |  |  |  |  |
| Zfp219     |  |  |  |  |  |  |
| Zfp229     |  |  |  |  |  |  |
| Zfp235     |  |  |  |  |  |  |
| Zfp251     |  |  |  |  |  |  |
| Zfp260     |  |  |  |  |  |  |
| Zfp27      |  |  |  |  |  |  |
| Zfp30      |  |  |  |  |  |  |
| Zfp319     |  |  |  |  |  |  |
| Zfp329     |  |  |  |  |  |  |
| Zfp358     |  |  |  |  |  |  |
| Zfp366     |  |  |  |  |  |  |
| Zfp386     |  |  |  |  |  |  |
| Zfp422-rs1 |  |  |  |  |  |  |
| Zfp426     |  |  |  |  |  |  |
| Zfp438     |  |  |  |  |  |  |
| Zfp442     |  |  |  |  |  |  |
| Zfp46      |  |  |  |  |  |  |
| Zfp512     |  |  |  |  |  |  |
| Zfp521     |  |  |  |  |  |  |
| Zfp563     |  |  |  |  |  |  |
| Zfp58      |  |  |  |  |  |  |
| Zfp60      |  |  |  |  |  |  |
| Zfp606     |  |  |  |  |  |  |
| Zfp617     |  |  |  |  |  |  |
| Zfp62      |  |  |  |  |  |  |
| Zfp652     |  |  |  |  |  |  |
| Zfp704     |  |  |  |  |  |  |
| Zfp706     |  |  |  |  |  |  |
| Zfp715     |  |  |  |  |  |  |
| Zfp72      |  |  |  |  |  |  |
| Zfp759     |  |  |  |  |  |  |
| Zfp763     |  |  |  |  |  |  |
| Zfp768     |  |  |  |  |  |  |
| Zfp771     |  |  |  |  |  |  |
| Zfp788     |  |  |  |  |  |  |
| Zfp799     |  |  |  |  |  |  |
| Zfp82      |  |  |  |  |  |  |
| Zfp825     |  |  |  |  |  |  |
| Zfp826     |  |  |  |  |  |  |
| Zfp827     |  |  |  |  |  |  |
| Zfp839     |  |  |  |  |  |  |
| Zfp84      |  |  |  |  |  |  |
| Zfp87      |  |  |  |  |  |  |
| Zfpm2      |  |  |  |  |  |  |
| Zgpat      |  |  |  |  |  |  |
| Zh2c2      |  |  |  |  |  |  |
| Zhx2       |  |  |  |  |  |  |
| Zkscan3    |  |  |  |  |  |  |
| Zmat1      |  |  |  |  |  |  |
| Zmat5      |  |  |  |  |  |  |
| Zmym3      |  |  |  |  |  |  |
| Zmym6      |  |  |  |  |  |  |
| Zmynd11    |  |  |  |  |  |  |
| Zmynd15    |  |  |  |  |  |  |
| Zranb3     |  |  |  |  |  |  |
| Zrsr1      |  |  |  |  |  |  |
| Zswim1     |  |  |  |  |  |  |
| Zyg11b     |  |  |  |  |  |  |
| l7Rn6      |  |  |  |  |  |  |
| rp9        |  |  |  |  |  |  |

Table S3: Putative mRNA targets for up-regulated miRNAs

| 2 Days Post-MI       |                       | 2 Weeks Post-MI               |                                          | 2 Months Post-MI          |                                                                    |
|----------------------|-----------------------|-------------------------------|------------------------------------------|---------------------------|--------------------------------------------------------------------|
| Down-regulated mRNAs | Up-regulated miRNAs   | Down-regulated mRNAs          | Up-regulated miRNAs                      | Down-regulated mRNAs      | Up-regulated miRNAs                                                |
| ARHGAP26 , KIAA0621  | mir-106a              | DKFZp564E0123 , CIAPIN1       | mir-195 , mir-16 , mir-497               | FAM102A                   | mir-19b                                                            |
| UNC84A , C7orf20     | mir-188-5p            | UXT                           | mir-484                                  | TMEM86A                   | mir-29a , mir-29c , mir-26b , mir-29b                              |
| CREBBP               | mir-582-3p            | ADRB1                         | mir-199a-3p                              | INSIG1                    | mir-19b , mir-29a , mir-29c , mir-29b                              |
| PDZD2 , KIAA0300     | mir-21                | MEF2D , MEF2D variant protein | mir-505                                  | LONRF1                    | mir-19b                                                            |
| RAD1                 | mir-582-3p            | RPS6KA2                       | mir-26a , mir-26b                        | OS-4 , CTDSP2             | mir-26b                                                            |
| RAB22A               | mir-106a , mir-21     | FLJ00380 , NFE2L1             | mir-195 , mir-16 , mir-497               | KIAA2035 , ZC3H6          | mir-15a , mir-195 , mir-16 , mir-497                               |
| PDCD4                | mir-21                | SUMO3                         | mir-199a-3p , mir-195 , mir-16 , mir-497 | THAP2                     | mir-26b                                                            |
| KIAA1536 , CALCOCO1  | mir-574-5p            | PDE4D , PDE4DN2               | mir-26a , mir-26b                        | OSBPL3                    | mir-29a , mir-29c , mir-29b                                        |
| ZDHHC1               | mir-106a              | CITED2                        | mir-199a-3p                              | ADAMTS7                   | mir-29a , mir-29c , mir-29b                                        |
| MYLIP                | mir-106a              | JPH1                          | mir-21                                   | PANK1                     | mir-15a , mir-195 , mir-16 , mir-497                               |
| NSUN4                | mir-188-5p            | NAMPT                         | mir-26a , mir-26b                        | CITED2                    | mir-199a-3p                                                        |
| USP46 , AK021861     | mir-106a              | CNTFR                         | mir-21                                   | NAMPT                     | mir-26b                                                            |
| AL832481 , MLLT6     | mir-106a , mir-296-5p | ANP32A                        | mir-212                                  | KIAA0856 , DMXL2          | mir-19b                                                            |
| EPHA7                | mir-106a              | TFAM                          | mir-199a-3p                              | PLP1                      | mir-29a , mir-29c , mir-29b                                        |
| HMGB3 , DKFZp779G118 | mir-106a , mir-324-5p | LYPLA2                        | mir-195 , mir-16 , mir-497 , mir-484     | MFHAS1                    | mir-199a-5p , mir-26b                                              |
| TMEM135              | mir-324-5p            | EPHA4                         | mir-21                                   | IHH                       | mir-15a , mir-195 , mir-16 , mir-497                               |
| UNQ550 , ENPP5       | mir-106a              | KCNA1                         | mir-21                                   | MLCK , MYLK               | mir-15a , mir-195 , mir-16 , mir-497                               |
| MAGI3 , KIAA1634     | mir-106a              | TCF15                         | mir-212                                  | LSM14B                    | mir-29a , mir-29c , mir-29b                                        |
| CDC37L1              | mir-106a              | MFAP3L                        | mir-26a , mir-26b                        | MTG8 , RUNX1T1            | mir-15a , mir-195 , mir-16 , mir-497                               |
| ITPKB                | mir-106a              | PRKAA2                        | mir-26a , mir-26b                        | TET1 , KIAA1676           | mir-29a , mir-29c , mir-26b , mir-29b                              |
| PLAG1                | mir-106a , mir-21     | SLC9A2                        | mir-26a , mir-26b                        | PTCH1 , patched a isoform | mir-15a , mir-195 , mir-16 , mir-497                               |
| FAM102A              | mir-106a              | FOXO4                         | mir-484                                  | SLC9A2                    | mir-19b , mir-26b                                                  |
| MED12L               | mir-106a              | POLR3G                        | mir-26a , mir-26b                        | SLC22A3                   | mir-19b                                                            |
| ATP11A , KIAA1021    | mir-106a              | SLC25A28                      | mir-212                                  | DHTKD1                    | mir-15a , mir-29a , mir-29c , mir-195 , mir-16 , mir-497 , mir-29b |
| SYT7                 | mir-106a              | TNS1 , MST091                 | mir-21                                   | RIT1                      | mir-29a , mir-29c , mir-29b                                        |
| USP24                | mir-106a              | ASF1A                         | mir-21                                   | ARHGEF3                   | mir-199a-3p                                                        |
| RPS6KA2              | mir-106a              | TRIP10 , STP                  | mir-195 , mir-16 , mir-497               | MKL2                      | mir-199a-5p , mir-19b                                              |
| NTN4                 | mir-106a              | GIT1                          | mir-195 , mir-16 , mir-497 , mir-484     | PDE4A                     | mir-19b                                                            |
| ZFP161               | mir-106a              | C10orf2 , PEO1                | mir-484                                  | SMARCD1                   | mir-199a-5p                                                        |
| THRB                 | mir-106a , mir-21     | ARL2                          | mir-195 , mir-16 , mir-497               | DKFZp564O1278 , SLITRK6   | mir-15a , mir-195 , mir-16 , mir-497                               |
| FKTN                 | mir-582-3p            | KIAA1171 , TBC1D24            | mir-484                                  | CXCL12                    | mir-19b                                                            |
| MIRK , DYRK1B        | mir-296-5p            | DKFZp586A1021 , MKNK2         | mir-26a , mir-26b                        | KCNJ2                     | mir-19b , mir-15a , mir-195 , mir-16 , mir-497 , mir-26b           |
| KLF12                | mir-106a , mir-21     | HK2                           | mir-484                                  | MAP2K6 , DKFZp686N0154    | mir-29a , mir-29c , mir-29b                                        |
| RRAGD                | mir-106a              | JKTBP , HNRPDL                | mir-505                                  | TST                       | mir-199a-5p                                                        |
| RMND5A               | mir-21                | SORT1                         | mir-195 , mir-16 , mir-497               | CD200 , MOX2              | mir-26b                                                            |
| ITFG1                | mir-106a              | ESRRG                         | mir-212 , mir-195 , mir-16 , mir-497     | CELSR2                    | mir-199a-3p                                                        |

|                                                        |                             |                  |                                                               |                         |                                                                             |
|--------------------------------------------------------|-----------------------------|------------------|---------------------------------------------------------------|-------------------------|-----------------------------------------------------------------------------|
| PFN2                                                   | mir-106a                    | RET              | mir-195 , mir-16 ,<br>mir-497                                 | RNF122                  | mir-29a , mir-29c ,<br>mir-29b                                              |
| LRP6                                                   | mir-296-5p , mir-21         | SOX2             | mir-21                                                        | SLC20A2                 | mir-15a , mir-199a-3p<br>, mir-195 , mir-16 ,<br>mir-497                    |
| KIAA0843 , ABLIM3                                      | mir-188-5p                  | MEIS1            | mir-505 , mir-212 ,<br>mir-21                                 | bim-alpha1 ,<br>BCL2L11 | mir-19b                                                                     |
| NTN1                                                   | mir-106a , mir-296-5p       | GIGYF1           | mir-212 , mir-195 ,<br>mir-16 , mir-497 ,<br>mir-484          | RARB                    | mir-15a , mir-29a ,<br>mir-29c , mir-195 ,<br>mir-16 , mir-497 ,<br>mir-29b |
| RGMB                                                   | mir-106a                    | AK3L1            | mir-195 , mir-16 ,<br>mir-497                                 | PDE11A                  | mir-199a-3p                                                                 |
| MAP1LC3A                                               | mir-423-5p                  | THRB             | mir-199a-3p , mir-21                                          | GK5                     | mir-29a , mir-29c ,<br>mir-29b                                              |
| COX7A2L                                                | mir-106a                    | MMAB             | mir-199a-3p                                                   | CDH4                    | mir-26b                                                                     |
| PPP1R9A                                                | mir-582-3p                  | SLC20A2          | mir-199a-3p , mir-195<br>, mir-16 , mir-497 ,<br>mir-484      | SCN4B                   | mir-19b , mir-15a ,<br>mir-195 , mir-16 ,<br>mir-497                        |
| TMEM64                                                 | mir-106a                    | VAMP8            | mir-195 , mir-16 ,<br>mir-497                                 | NRN1                    | mir-15a , mir-195 ,<br>mir-16 , mir-497                                     |
| ATP1A2 , KIAA0778                                      | mir-106a                    | MAP3K4 , MTK1    | mir-199a-3p , mir-195<br>, mir-16 , mir-497                   | BMPER                   | mir-19b                                                                     |
| SOBP                                                   | mir-106a                    | RARB             | mir-195 , mir-16 ,<br>mir-497                                 | LPHN1                   | mir-15a , mir-195 ,<br>mir-16 , mir-497 ,<br>mir-26b                        |
| COQ2                                                   | mir-106a                    | PDE11A           | mir-199a-3p                                                   | MDM4 , MDMX             | mir-19b                                                                     |
| VDAC1                                                  | mir-324-5p                  | ESRRA            | mir-195 , mir-16 ,<br>mir-497                                 | EIF2C4                  | mir-15a , mir-195 ,<br>mir-16 , mir-497                                     |
| ST3GAL3 ,<br>ST3GalIII                                 | mir-188-5p                  | TMEM170B         | mir-199a-3p , mir-195<br>, mir-16 , mir-497                   | CNN1                    | mir-199a-5p , mir-15a<br>, mir-195 , mir-16 ,<br>mir-497                    |
| FASTK ,<br>DKFZp667F1810                               | mir-106a                    | EGLN2            | mir-195 , mir-16 ,<br>mir-497                                 | FBXO10                  | mir-15a , mir-195 ,<br>mir-16 , mir-497                                     |
| DKFZp781J13156 ,<br>KIAA1756 , RP3-<br>398G3.1 , SYNE1 | mir-106a                    | MTX2             | mir-26a , mir-26b                                             | ZBTB44                  | mir-15a , mir-195 ,<br>mir-16 , mir-497                                     |
| CTDSP1                                                 | mir-296-5p                  | nifS , NFS1      | mir-195 , mir-16 ,<br>mir-497                                 | NLGN3                   | mir-29a , mir-29c ,<br>mir-29b                                              |
| CUGBP2 , NAPOR-1                                       | mir-106a                    | LLGL2            | mir-199a-3p                                                   | UNQ271 , BCAR3          | mir-199a-3p                                                                 |
| PTPN3                                                  | mir-106a                    | RGS7BP           | mir-212 , mir-21                                              | WNT5A                   | mir-26b                                                                     |
| PACE4C , PCSK6                                         | mir-21                      | SLC1A1           | mir-26a , mir-26b                                             |                         |                                                                             |
| P2RX4                                                  | mir-106a                    | WDTC1 , KIAA1037 | mir-195 , mir-16 ,<br>mir-497                                 |                         |                                                                             |
| HDDC3                                                  | mir-423-5p                  | SCN4B            | mir-195 , mir-16 ,<br>mir-497                                 |                         |                                                                             |
| FOXN3                                                  | mir-582-3p , mir-574-<br>5p | BCL7A            | mir-195 , mir-16 ,<br>mir-497 , mir-21                        |                         |                                                                             |
| PCMTD1                                                 | mir-106a                    | CYP26B1          | mir-195 , mir-16 ,<br>mir-497                                 |                         |                                                                             |
| PALLD                                                  | mir-106a                    | PPP1R12B , MYPT2 | mir-195 , mir-16 ,<br>mir-497                                 |                         |                                                                             |
| DKFZp451C023 ,<br>SRL                                  | mir-21                      | CPEB3            | mir-26a , mir-195 ,<br>mir-16 , mir-497 ,<br>mir-26b , mir-21 |                         |                                                                             |
| TBX3                                                   | mir-106a                    | AGPAT3           | mir-195 , mir-16 ,<br>mir-497                                 |                         |                                                                             |
| RBPJ                                                   | mir-21                      | UNG              | mir-195 , mir-16 ,<br>mir-497                                 |                         |                                                                             |
| PKIA                                                   | mir-423-5p                  | FKBP2            | mir-212                                                       |                         |                                                                             |
| CROT                                                   | mir-106a                    | GC1 , SLC25A22   | mir-195 , mir-16 ,<br>mir-497                                 |                         |                                                                             |
| ALS2CR17 ,<br>NBEAL1                                   | mir-106a                    | SNCG             | mir-195 , mir-16 ,<br>mir-497                                 |                         |                                                                             |
| POLL                                                   | mir-296-5p                  | ARL3             | mir-195 , mir-16 ,<br>mir-497                                 |                         |                                                                             |
| SNX16                                                  | mir-106a                    |                  |                                                               |                         |                                                                             |
| FRS2                                                   | mir-106a                    |                  |                                                               |                         |                                                                             |
| KIAA1664 , OSBP2                                       | mir-423-5p                  |                  |                                                               |                         |                                                                             |
| ULK1                                                   | mir-106a                    |                  |                                                               |                         |                                                                             |
| MSH2                                                   | mir-21                      |                  |                                                               |                         |                                                                             |

|                                       |                       |  |  |  |  |
|---------------------------------------|-----------------------|--|--|--|--|
| MGEA5 , KIAA0679                      | mir-106a              |  |  |  |  |
| CCND2                                 | mir-106a              |  |  |  |  |
| RARB                                  | mir-106a              |  |  |  |  |
| RREB1 , Zep-1                         | mir-582-3p            |  |  |  |  |
| LPGAT1                                | mir-106a              |  |  |  |  |
| CGEF2 , RAPGEF4                       | mir-106a              |  |  |  |  |
| VLDLR                                 | mir-106a              |  |  |  |  |
| NFIB                                  | mir-106a , mir-21     |  |  |  |  |
| MATN2                                 | mir-21                |  |  |  |  |
| ZBTB4                                 | mir-106a              |  |  |  |  |
| THRA                                  | mir-106a              |  |  |  |  |
| NTF3                                  | mir-21                |  |  |  |  |
| FOXJ2                                 | mir-106a              |  |  |  |  |
| LMBR1 , DIF14 ,<br>DKFZp547F222       | mir-21                |  |  |  |  |
| PLSCR4                                | mir-106a              |  |  |  |  |
| TSPAN3 , TSPAN-3                      | mir-423-5p            |  |  |  |  |
| SLC41A1                               | mir-106a              |  |  |  |  |
| LANCL1                                | mir-21                |  |  |  |  |
| RPS6KA5 , MSK1                        | mir-106a              |  |  |  |  |
| RBL2 ,<br>DKFZp781K2028               | mir-106a              |  |  |  |  |
| SLC25A36                              | mir-106a              |  |  |  |  |
| ZYG11B                                | mir-21                |  |  |  |  |
| HBP1                                  | mir-106a              |  |  |  |  |
| GNB5                                  | mir-106a              |  |  |  |  |
| ERBB3 , c-erbB-3                      | mir-106a              |  |  |  |  |
| SLC40A1 , MST079                      | mir-106a              |  |  |  |  |
| ADAMTS5                               | mir-106a              |  |  |  |  |
| SNX21 , C20orf161                     | mir-106a              |  |  |  |  |
| RGMA ,<br>DKFZp434D0727               | mir-106a              |  |  |  |  |
| MTERFD2                               | mir-106a              |  |  |  |  |
| DKFZp762B153 ,<br>MAP1LC3B            | mir-188-5p            |  |  |  |  |
| F3                                    | mir-106a              |  |  |  |  |
| FYCO1                                 | mir-106a              |  |  |  |  |
| CNNM3                                 | mir-106a              |  |  |  |  |
| LAPTM4A                               | mir-106a              |  |  |  |  |
| SRPK2                                 | mir-106a              |  |  |  |  |
| KIAA1506 ,<br>DKFZp434D2011 ,<br>MLL3 | mir-188-5p , mir-106a |  |  |  |  |
| ADAMTS10                              | mir-296-5p            |  |  |  |  |
| SH3GLB2                               | mir-574-5p            |  |  |  |  |
| STK11                                 | mir-106a              |  |  |  |  |
| FRMD5                                 | mir-188-5p            |  |  |  |  |
| ADRA1B                                | mir-106a              |  |  |  |  |
| SNED1 , AL833363 ,<br>FLJ00133        | mir-423-5p            |  |  |  |  |
| SLC46A3                               | mir-106a              |  |  |  |  |
| CTSA                                  | mir-106a              |  |  |  |  |
| GUCY1A3                               | mir-106a              |  |  |  |  |
| MRAS                                  | mir-423-5p            |  |  |  |  |
| UBXN2A                                | mir-106a              |  |  |  |  |
| ACVR2A                                | mir-21                |  |  |  |  |
| FBXW7                                 | mir-188-5p            |  |  |  |  |
| GJA1                                  | mir-582-3p            |  |  |  |  |
| ATXN1                                 | mir-188-5p , mir-106a |  |  |  |  |
| ZNRF1                                 | mir-423-5p            |  |  |  |  |
| CAMK2N1 ,<br>CaMKIINalpha             | mir-106a              |  |  |  |  |
| SAMD12                                | mir-106a              |  |  |  |  |
| ABCA1                                 | mir-106a              |  |  |  |  |
| KDELC2                                | mir-574-5p            |  |  |  |  |
| HDAC9 , KIAA0744                      | mir-188-5p            |  |  |  |  |
| CENPQ                                 | mir-106a              |  |  |  |  |
| ELF2                                  | mir-21                |  |  |  |  |
| RGS7BP                                | mir-21                |  |  |  |  |
| RAD51L3 , RFFL                        | mir-21                |  |  |  |  |

|                              |                                    |  |  |  |  |
|------------------------------|------------------------------------|--|--|--|--|
| ARHGAP24                     | mir-21                             |  |  |  |  |
| BC140093 , KIAA1031 , ZC3H7B | mir-106a , mir-296-5p , mir-324-5p |  |  |  |  |
| NT5C3                        | mir-574-5p                         |  |  |  |  |
| PHF1                         | mir-106a                           |  |  |  |  |
| TMEM25                       | mir-106a                           |  |  |  |  |
| TPPP                         | mir-188-5p , mir-106a              |  |  |  |  |
| RAB12                        | mir-106a                           |  |  |  |  |
| TM7SF1 , GPR137B             | mir-106a                           |  |  |  |  |
| GAB1                         | mir-106a                           |  |  |  |  |
| MEF2C                        | mir-551b                           |  |  |  |  |
| KIAA0388 , EZH1              | mir-106a                           |  |  |  |  |
| WNK1 , KIAA0344              | mir-106a                           |  |  |  |  |
| MST023 , KIAA0833 , CAMTA1   | mir-106a                           |  |  |  |  |
| RHOB                         | mir-21                             |  |  |  |  |
| VPS13C                       | mir-106a                           |  |  |  |  |
| XDH                          | mir-582-3p                         |  |  |  |  |
| CR604521 , EGLN1             | mir-106a                           |  |  |  |  |
| WDTC1 , KIAA1037             | mir-296-5p                         |  |  |  |  |
| CREBL2                       | mir-21                             |  |  |  |  |
| ERBB4                        | mir-551b                           |  |  |  |  |
| UBR7                         | mir-188-5p                         |  |  |  |  |
| TNRC6B                       | mir-106a , mir-21 , mir-423-5p     |  |  |  |  |
| PHTF2                        | mir-106a                           |  |  |  |  |
| IQSEC1                       | mir-106a                           |  |  |  |  |
| DKFZp434D2111 , WWP1         | mir-21                             |  |  |  |  |
| BCL7A                        | mir-21                             |  |  |  |  |
| RAPGEF2                      | mir-106a                           |  |  |  |  |
| USF2                         | mir-423-5p                         |  |  |  |  |
| FBW1A , BTRC                 | mir-582-3p                         |  |  |  |  |
| UQCRB                        | mir-21                             |  |  |  |  |
| EPHA4                        | mir-106a , mir-21                  |  |  |  |  |
| NRN1                         | mir-574-5p                         |  |  |  |  |
| ATPAF1                       | mir-21                             |  |  |  |  |
| ETV1                         | mir-106a                           |  |  |  |  |
| LACE1                        | mir-106a                           |  |  |  |  |
| IDH1                         | mir-574-5p                         |  |  |  |  |
| PRELP                        | mir-296-5p                         |  |  |  |  |
| MFAP3L                       | mir-106a                           |  |  |  |  |
| TET1 , KIAA1676              | mir-188-5p , mir-106a , mir-21     |  |  |  |  |
| TBC1D17                      | mir-106a                           |  |  |  |  |
| PAFAH2                       | mir-106a                           |  |  |  |  |
| RTN2                         | mir-296-5p                         |  |  |  |  |
| EFEMP1                       | mir-574-5p                         |  |  |  |  |
| ANKRD29                      | mir-106a                           |  |  |  |  |
| PPP1R12B , MYPT2             | mir-106a                           |  |  |  |  |
| DKFZp434L0130 , ARHGAP12     | mir-106a                           |  |  |  |  |
| RAD23A                       | mir-423-5p                         |  |  |  |  |
| LPHN1                        | mir-551b                           |  |  |  |  |
| TIMP2                        | mir-106a                           |  |  |  |  |
| ARL5B                        | mir-188-5p                         |  |  |  |  |
| CPEB3                        | mir-106a , mir-21                  |  |  |  |  |
| CEP97                        | mir-106a                           |  |  |  |  |
| FBXO31                       | mir-106a                           |  |  |  |  |
| FOXO4                        | mir-574-5p                         |  |  |  |  |
| PPARA                        | mir-106a , mir-21                  |  |  |  |  |
| C21orf4 , TMEM50B            | mir-188-5p , mir-106a              |  |  |  |  |
| FAT4                         | mir-106a                           |  |  |  |  |
| DKFZp761O0610 , CLIP4        | mir-106a                           |  |  |  |  |
| SLC22A3                      | mir-188-5p                         |  |  |  |  |
| ZHX2                         | mir-106a                           |  |  |  |  |
| EIF2C4                       | mir-21                             |  |  |  |  |
| HLF                          | mir-106a                           |  |  |  |  |
| BAMBI                        | mir-106a                           |  |  |  |  |

|                                             |                                             |  |  |  |  |
|---------------------------------------------|---------------------------------------------|--|--|--|--|
| B3GALT2                                     | mir-106a                                    |  |  |  |  |
| PTPRD                                       | mir-106a , mir-324-5p                       |  |  |  |  |
| SLC25A27                                    | mir-106a                                    |  |  |  |  |
| PRKCE                                       | mir-21                                      |  |  |  |  |
| MPDZ variant protein , MPDZ                 | mir-106a                                    |  |  |  |  |
| SLC16A9                                     | mir-106a                                    |  |  |  |  |
| ASF1A                                       | mir-21                                      |  |  |  |  |
| ATG2A                                       | mir-106a                                    |  |  |  |  |
| DKFZp434P2350 , CDH23 , KIAA1774 , KIAA1812 | mir-296-5p                                  |  |  |  |  |
| PLCB1                                       | mir-106a                                    |  |  |  |  |
| FBXO10                                      | mir-106a                                    |  |  |  |  |
| PCDH19                                      | mir-324-5p                                  |  |  |  |  |
| MAP3K5                                      | mir-582-3p , mir-106a                       |  |  |  |  |
| CABLES1                                     | mir-106a                                    |  |  |  |  |
| SLC2A4                                      | mir-106a , mir-423-5p                       |  |  |  |  |
| TRIP10 , STP                                | mir-106a                                    |  |  |  |  |
| IRX4                                        | mir-574-5p                                  |  |  |  |  |
| MRPL49                                      | mir-21                                      |  |  |  |  |
| NBEA , KIAA1544                             | mir-188-5p , mir-106a , mir-574-5p , mir-21 |  |  |  |  |
| SCRN1                                       | mir-21                                      |  |  |  |  |
| CDC23                                       | mir-106a                                    |  |  |  |  |
| H2AFV                                       | mir-582-3p                                  |  |  |  |  |
| CCNT2                                       | mir-188-5p                                  |  |  |  |  |
| ZBTB44                                      | mir-106a                                    |  |  |  |  |
| POLQ                                        | mir-106a                                    |  |  |  |  |
| ARHGEF3                                     | mir-106a                                    |  |  |  |  |
| ST6GalNAc VI , ST6GALNAC6                   | mir-106a                                    |  |  |  |  |
| FOXO3                                       | mir-582-3p , mir-574-5p                     |  |  |  |  |
| tgr , MAT2B                                 | mir-106a                                    |  |  |  |  |
| TEF                                         | mir-423-5p                                  |  |  |  |  |
| SAR1B                                       | mir-106a                                    |  |  |  |  |
| FBXO21                                      | mir-106a                                    |  |  |  |  |
| JARID2                                      | mir-188-5p                                  |  |  |  |  |
| SLC17A7 , BNPI                              | mir-106a                                    |  |  |  |  |
| ANKRD12 , KIAA0874                          | mir-188-5p , mir-106a                       |  |  |  |  |
| FAM40B                                      | mir-106a                                    |  |  |  |  |
| AK1                                         | mir-423-5p                                  |  |  |  |  |
| TRMT5                                       | mir-21                                      |  |  |  |  |
| SLICK , KCNT2                               | mir-582-3p                                  |  |  |  |  |
| A2BP1                                       | mir-582-3p                                  |  |  |  |  |
| BRMS1L                                      | mir-106a                                    |  |  |  |  |
| FNIP1                                       | mir-188-5p                                  |  |  |  |  |
| IL17RD                                      | mir-106a                                    |  |  |  |  |
| PDE4A                                       | mir-188-5p                                  |  |  |  |  |
| DNAJA2                                      | mir-21                                      |  |  |  |  |
| CHCHD8                                      | mir-188-5p                                  |  |  |  |  |
| GMPR                                        | mir-296-5p                                  |  |  |  |  |
| ZSWIM1                                      | mir-574-5p                                  |  |  |  |  |
| AJ420489 , OSTM1                            | mir-106a                                    |  |  |  |  |
| LIFR                                        | mir-21                                      |  |  |  |  |
| ESRRG                                       | mir-324-5p                                  |  |  |  |  |
| PRRG1 , PRGP1                               | mir-106a                                    |  |  |  |  |
| ZFPM2                                       | mir-106a                                    |  |  |  |  |
| MFN2                                        | mir-106a                                    |  |  |  |  |
| LRRC57                                      | mir-21                                      |  |  |  |  |

34  
35  
36  
37  
38



Table S4: Putative mRNA targets for down-regulated miRNAs

| 2 Days Post-MI                  |                                                                           | 2 Weeks Post-MI               |                       | 2 Months Post-MI               |                       |
|---------------------------------|---------------------------------------------------------------------------|-------------------------------|-----------------------|--------------------------------|-----------------------|
| Up-regulated mRNAs              | Down-regulated miRNAs                                                     | Up-regulated mRNAs            | Down-regulated miRNAs | Up-regulated mRNAs             | Down-regulated miRNAs |
| ACTG1                           | mir-10a                                                                   | ACTG1                         | mir-10a               | TNIP1 , NAF1                   | mir-760               |
| MYH10 , MYH10 variant protein   | mir-208a , mir-181c , mir-27a , mir-876-3p , mir-27b , mir-181b , mir-421 | MYH10 , MYH10 variant protein | mir-208a , mir-323-5p | SHISA4                         | mir-150               |
| FAM46C                          | mir-181c , mir-181b                                                       | RAD23B                        | mir-188-5p            | PTPN9                          | mir-329 , mir-760     |
| SLC35E4                         | mir-22                                                                    | RHBDF1                        | mir-323-5p            | DBN1 , DKFZp434D064            | mir-615-5p            |
| EEF2K                           | let-7g , let-7f                                                           | DNM2                          | mir-130b              | NUMBL                          | mir-329               |
| ATP13A3                         | mir-376b                                                                  | VGLL3                         | mir-130b              | SLC7A6                         | mir-760               |
| RAD23B                          | mir-181c , mir-181b                                                       | HNRNPF                        | mir-29c               | PTPN1                          | mir-329               |
| SNX1                            | let-7g , let-7f , mir-421                                                 | ITGA6                         | mir-29c               | JUNB                           | mir-744               |
| NRAS                            | let-7g , let-7f                                                           | KCTD17                        | mir-10a               | FBN1                           | mir-329               |
| HNRNPF                          | mir-27a , mir-27b                                                         | RAPH1                         | mir-29c               | PRKCA                          | mir-329 , mir-760     |
| EPHA2                           | mir-10a                                                                   | HIP1                          | mir-29c               | ATP8A2                         | mir-150               |
| MED14 , EXLM1                   | mir-27a , mir-27b                                                         | HCN1                          | mir-10a               | GRK5                           | mir-760               |
| KCTD17                          | let-7g , let-7f , mir-10a                                                 | DKFZp564B0982 , CEP170        | mir-130b              | MMP2                           | mir-760               |
| HIP1                            | mir-27a , mir-27b                                                         | BACE , BACE1                  | mir-29c               | DAGLA                          | mir-760               |
| LIM , PDLIM5                    | mir-27a , mir-876-3p , mir-27b                                            | FZD8                          | mir-208a              | AKAP2                          | mir-329               |
| GALNTL1                         | mir-181c , mir-181b                                                       | MGAT4A                        | mir-29c               | PRKARIA                        | mir-150               |
| DCUN1D3                         | let-7g , let-7f                                                           | NID1                          | mir-29c               | FREM2 , DKFZp686L06109         | mir-760               |
| elys , AHCTF1                   | let-7g , let-7f                                                           | PRNP                          | mir-130b              | AKAP2 , KIAA0920 , PALM2-AKAP2 | mir-329               |
| MMP14                           | mir-181c , mir-181b                                                       | HSPDE1A , PDE1A               | mir-149               | UBTD2                          | mir-760               |
| CNN3                            | mir-27a , mir-27b                                                         | P4HB , OK/SW-cl.24            | mir-188-5p            | KCTD11                         | mir-329               |
| PTPN9                           | mir-22 , mir-181c , mir-181b                                              | EIF5                          | mir-208a , mir-149    | SEMA4C                         | mir-615-5p            |
| GJC1                            | let-7g , let-7f , mir-409-3p , mir-421                                    | RYBP                          | mir-29c               | TGFB1                          | mir-744               |
| MGAT4A                          | let-7g , let-7f                                                           | RBMS3                         | mir-378               | AX746869 , SAMD4B              | mir-760               |
| PICALM variant protein , PICALM | mir-181c , mir-181b , mir-421                                             | TRAM2                         | mir-29c               |                                |                       |
| GLRX                            | let-7g , let-7f                                                           | USP31 , KIAA1203              | mir-29c               |                                |                       |
| PLS3                            | mir-421                                                                   | BAIAP2                        | mir-29c               |                                |                       |
| HSPDE1A , PDE1A                 | mir-149                                                                   | PLSCR3                        | mir-29c               |                                |                       |
| EIF5                            | mir-208a , mir-149 , mir-27a , mir-27b                                    | S1PR1                         | mir-130b              |                                |                       |
| PI4K2B                          | mir-181c , mir-181b                                                       | KCTD5                         | mir-29c               |                                |                       |
| TNS3                            | mir-181c , mir-181b                                                       | PAG1                          | mir-29c               |                                |                       |
| USP31 , KIAA1203                | mir-27a , mir-27b                                                         | TARDBP                        | mir-130b              |                                |                       |
| BAIAP2                          | mir-181c , mir-181b                                                       | PTPRJ                         | mir-130b              |                                |                       |
| USP7                            | mir-421                                                                   | CHMP4B                        | mir-130b              |                                |                       |
| SLC2A1                          | mir-22                                                                    | PTPN1                         | mir-29c               |                                |                       |
| S1PR1                           | mir-181c , mir-409-3p , mir-181b                                          | CPNE8                         | mir-188-5p            |                                |                       |
| PAG1                            | let-7g , let-7f                                                           | ARHGEF12                      | mir-130b              |                                |                       |
| TARDBP                          | mir-181c , mir-27a , mir-27b , mir-181b                                   | FBN1                          | mir-29c               |                                |                       |
| SENP5                           | let-7g , let-7f                                                           | SLC43A2                       | mir-29c               |                                |                       |
| PTPRJ                           | mir-27a , mir-27b                                                         | INO80                         | mir-130b              |                                |                       |
| DNAJB9                          | let-7g , let-7f , mir-27a , mir-27b                                       | UBE2I                         | mir-188-5p , mir-10a  |                                |                       |
| UBE2J1                          | mir-181c , mir-181b                                                       | VASH1                         | mir-149 , mir-29c     |                                |                       |
| DOCK7 , KIAA1771                | mir-181c , mir-181b                                                       | TRPS1                         | mir-323-5p , mir-130b |                                |                       |
| SLC35D2 , hfrc                  | let-7g , let-7f                                                           | SNX4                          | mir-29c , mir-10a     |                                |                       |
| SSH1                            | let-7g , let-7f                                                           | RNF41                         | mir-149 , mir-130b    |                                |                       |
| INO80                           | mir-181c , mir-181b                                                       | DKFZp686I1750 , SASH1         | mir-130b              |                                |                       |
| UBE2I                           | mir-10a                                                                   | DSEL                          | mir-130b              |                                |                       |
| VASH1                           | mir-22 , mir-149                                                          | SPRY4                         | mir-29c               |                                |                       |

|                                |                                                                    |                            |                                 |  |  |
|--------------------------------|--------------------------------------------------------------------|----------------------------|---------------------------------|--|--|
| AF116693 ,<br>SLC25A37 , HT015 | mir-181c , mir-181b                                                | HNRNPA1 ,<br>HNRPA1        | mir-149                         |  |  |
| PAK6                           | mir-27a , mir-27b                                                  | GAS7                       | mir-29c                         |  |  |
| SNX4                           | mir-10a                                                            | ZDHHC2                     | mir-130b                        |  |  |
| RNF41                          | mir-149                                                            | MMP2                       | mir-29c                         |  |  |
| FOSB                           | mir-27a , mir-27b                                                  | ELL2                       | mir-29c                         |  |  |
| H3F3B                          | mir-22 , mir-208a ,<br>mir-27a , mir-409-3p ,<br>mir-27b , mir-10a | RAP1B , LOC643752          | mir-149                         |  |  |
| NFKBIZ                         | mir-376b                                                           | MED15 , PCQAP              | mir-130b                        |  |  |
| SPRY4                          | mir-181c , mir-181b                                                | DCLRE1B                    | mir-149                         |  |  |
| HNRNPA1 ,<br>HNRPA1            | mir-149 , mir-421                                                  | COL5A1                     | mir-29c                         |  |  |
| OLR1 , BC055085                | let-7g , let-7f                                                    | COL4A1                     | mir-29c                         |  |  |
| GAS7                           | let-7g , let-7f , mir-<br>181c , mir-181b , mir-<br>421            | CMPK1                      | mir-29c , mir-130b              |  |  |
| KIAA1108 , TBC1D1              | mir-181c , mir-181b                                                | LRRC8A                     | mir-208a                        |  |  |
| B4GALT1                        | mir-181c , mir-181b                                                | CBL                        | mir-378                         |  |  |
| TMEM165                        | mir-181c , mir-181b                                                | CHST1                      | mir-130b                        |  |  |
| THBS1                          | let-7g , let-7f                                                    | KIAA1218 ,<br>ATXN7L1      | mir-130b                        |  |  |
| LRRC8D                         | mir-181c , mir-181b                                                | E2F7                       | mir-29c , mir-130b ,<br>mir-10a |  |  |
| CACNA1D                        | let-7g , let-7f                                                    | NAV3                       | mir-29c                         |  |  |
| ELL2                           | mir-27a , mir-27b                                                  | AGPAT4 , LPAAT-<br>delta   | mir-29c                         |  |  |
| RDH10                          | let-7g , let-7f                                                    | HMCN1 , FIBL-6             | mir-29c                         |  |  |
| RAP1B , LOC643752              | mir-149 , mir-181c ,<br>mir-27a , mir-27b ,<br>mir-181b            | CDC42                      | mir-29c                         |  |  |
| ADRB2                          | let-7g , let-7f                                                    | GOLT1B ,<br>DKFZp761G2423  | mir-130b                        |  |  |
| PCTK3                          | mir-27a , mir-27b                                                  | ADAMTS10                   | mir-29c                         |  |  |
| CDV3                           | let-7g , let-7f                                                    | CCT6A                      | mir-130b                        |  |  |
| HNRNPA3                        | mir-22                                                             | LAMC2                      | mir-29c                         |  |  |
| DCLRE1B                        | mir-149                                                            | MTMR9                      | mir-149 , mir-130b              |  |  |
| COL4A1                         | let-7g , let-7f                                                    | LASP1                      | mir-29c                         |  |  |
| DOCK4 , KIAA0716               | mir-181c , mir-181b                                                | PRR3                       | mir-29c                         |  |  |
| LRRC8A                         | mir-208a                                                           | CALM1 , CALM3              | mir-29c                         |  |  |
| ATF3                           | mir-27a , mir-27b                                                  | TAPT1                      | mir-323-5p                      |  |  |
| CBL                            | let-7g , mir-22 , let-7f<br>, mir-421                              | FAM105B                    | mir-29c                         |  |  |
| SERP1                          | mir-27a , mir-27b                                                  | YWHAZ                      | mir-149 , mir-188-5p            |  |  |
| LASS6                          | mir-27a , mir-27b                                                  | TCF12 ,<br>DKFZp451F163    | mir-208a                        |  |  |
| TRIOBP                         | let-7g , let-7f                                                    | COL11A1                    | mir-29c                         |  |  |
| CHST1                          | mir-27a , mir-27b                                                  | CHIC2                      | mir-29c                         |  |  |
| EFHD2                          | let-7g , let-7f                                                    | TBETARI , TGFBR1           | mir-208a , mir-130b             |  |  |
| E2F7                           | mir-181c , mir-27a ,<br>mir-27b , mir-181b ,<br>mir-10a            | Mad4 , MXD4                | mir-323-5p                      |  |  |
| PXN                            | mir-27a , mir-27b                                                  | FMR1                       | mir-130b                        |  |  |
| KLF6                           | mir-181c , mir-181b                                                | TMEM39A                    | mir-188-5p                      |  |  |
| APAF1                          | mir-27a , mir-27b                                                  | ENDOD1                     | mir-130b                        |  |  |
| DDX19B                         | let-7g , let-7f                                                    | CASP7                      | mir-29c                         |  |  |
| SLC30A7 ,<br>BX648884          | let-7g , let-7f                                                    | ZMIZ1                      | mir-29c                         |  |  |
| AIDA ,<br>DKFZp666C185         | mir-27a , mir-27b                                                  | PVRL1                      | mir-149 , mir-29c               |  |  |
| CDC42                          | mir-27a , mir-27b ,<br>mir-421                                     | ACACA                      | mir-29c                         |  |  |
| GOLT1B ,<br>DKFZp761G2423      | let-7g , let-7f                                                    | MLLT11                     | mir-29c                         |  |  |
| CYP1B1                         | mir-27a , mir-27b                                                  | HSPA8 , HSC54              | mir-130b                        |  |  |
| YTHDF2                         | mir-181c , mir-181b ,<br>mir-421                                   | GNG12                      | mir-29c                         |  |  |
| MTMR9                          | mir-149 , mir-181c ,<br>mir-181b                                   | DKFZp686D23123 ,<br>COL6A3 | mir-29c , mir-130b              |  |  |
| PRR3                           | mir-27a , mir-27b                                                  | FOXN2                      | mir-188-5p                      |  |  |

|                         |                                                                                                          |                      |                                    |  |  |
|-------------------------|----------------------------------------------------------------------------------------------------------|----------------------|------------------------------------|--|--|
| LASP1                   | mir-27a , mir-27b                                                                                        | TAF4B                | mir-130b                           |  |  |
| PPP1R2                  | mir-181c , mir-181b                                                                                      | CPT1A                | mir-188-5p                         |  |  |
| CALM1 , CALM3           | mir-22 , mir-27a ,<br>mir-27b                                                                            | EVI5                 | mir-188-5p                         |  |  |
| DUSP5                   | mir-181c , mir-27a ,<br>mir-27b , mir-181b                                                               | NCDN                 | mir-149                            |  |  |
| KIAA1734 , UBE2O        | mir-22 , mir-421                                                                                         | ITPR1 , Insp3ri      | mir-130b                           |  |  |
| SLC30A4                 | let-7g , let-7f                                                                                          | CNOT6                | mir-29c , mir-130b ,<br>mir-10a    |  |  |
| TAPT1                   | mir-27a , mir-876-3p ,<br>mir-27b                                                                        | ATP6V1A              | mir-29c                            |  |  |
| FAM105B                 | mir-27a , mir-27b                                                                                        | PRKD3                | mir-130b                           |  |  |
| MDF1                    | let-7g , let-7f , mir-<br>27a , mir-27b                                                                  | TDG                  | mir-29c                            |  |  |
| UFM1                    | let-7g , let-7f                                                                                          | UTP18                | mir-208a                           |  |  |
| PHACTR4                 | mir-149 , mir-181c ,<br>mir-181b                                                                         | RNF169               | mir-29c                            |  |  |
| UAP1                    | mir-27a , mir-27b                                                                                        | NID2                 | mir-29c                            |  |  |
| YWHAZ                   | mir-22 , mir-149                                                                                         | DIO2                 | mir-29c                            |  |  |
| TCF12 ,<br>DKFZp451F163 | mir-208a                                                                                                 | ETS1                 | mir-208a                           |  |  |
| PDIA5                   | mir-27a , mir-27b                                                                                        | SRPX2                | mir-149                            |  |  |
| PHLDA1                  | mir-181c , mir-876-3p<br>, mir-181b                                                                      | ARHGAP1              | mir-130b                           |  |  |
| CAP1                    | let-7g , let-7f                                                                                          | MTMR12               | mir-130b                           |  |  |
| MUTED                   | let-7g , let-7f , mir-<br>27a , mir-27b                                                                  | PXDN                 | mir-29c , mir-130b                 |  |  |
| SOCS3                   | mir-181c , mir-181b                                                                                      | ATXN7L3              | mir-188-5p                         |  |  |
| SURF4                   | let-7g , let-7f , mir-<br>27a , mir-27b                                                                  | CCDC6                | mir-149 , mir-188-5p<br>, mir-130b |  |  |
| GCLM                    | mir-10a                                                                                                  | AKT3 , BC019085      | mir-29c                            |  |  |
| TBETAR1 , TGFBR1        | let-7g , mir-22 , mir-<br>208a , let-7f , mir-<br>181c , mir-376b , mir-<br>27a , mir-27b , mir-<br>181b | KIAA0517 , TRIM2     | mir-130b , mir-10a                 |  |  |
| FMR1                    | mir-181c , mir-181b                                                                                      | PPP1R15B             | mir-29c , mir-130b                 |  |  |
| ATP8B4 , KIAA1939       | let-7g , let-7f                                                                                          | DLG5 , KIAA0583      | mir-188-5p , mir-<br>130b          |  |  |
| BM009 , FAM49B          | mir-22                                                                                                   | POLE3                | mir-29c                            |  |  |
| ARRB1                   | mir-22                                                                                                   | GMFB                 | mir-29c , mir-130b                 |  |  |
| ZMIZ1                   | mir-409-3p                                                                                               | PLEKHA1              | mir-29c                            |  |  |
| SYNJ1                   | mir-27a , mir-27b                                                                                        | KIF26B               | mir-29c                            |  |  |
| CDR2L                   | mir-27a , mir-27b                                                                                        | CDCA4                | mir-208a , mir-29c                 |  |  |
| PVRL1                   | mir-149                                                                                                  | GNB4                 | mir-29c                            |  |  |
| NUP153                  | mir-27a , mir-27b                                                                                        | PLEKHG2              | mir-378                            |  |  |
| ACACA                   | mir-421                                                                                                  | MIB1                 | mir-29c , mir-130b                 |  |  |
| ARF6                    | mir-181c , mir-27a ,<br>mir-27b , mir-181b                                                               | NUS1                 | mir-130b                           |  |  |
| LPP                     | mir-22 , mir-181c ,<br>mir-181b                                                                          | MDFIC , BC040713     | mir-130b                           |  |  |
| GNG12                   | mir-27a , mir-27b                                                                                        | COL4A2               | mir-29c                            |  |  |
| EIF2S2                  | let-7g , let-7f , mir-<br>27a , mir-27b , mir-<br>421                                                    | PFTK1 , KIAA0834     | mir-208a                           |  |  |
| HMGCR                   | mir-27a , mir-27b                                                                                        | MANBAL               | mir-149                            |  |  |
| PIP5K1A                 | mir-409-3p                                                                                               | MTMR6                | mir-130b                           |  |  |
| EVI5                    | mir-27a , mir-27b                                                                                        | CEP55                | mir-130b                           |  |  |
| MBLL , MBNL2            | mir-181c , mir-181b                                                                                      | SMAP1                | mir-10a                            |  |  |
| NCDN                    | mir-149                                                                                                  | RRP15                | mir-149                            |  |  |
| HTT                     | mir-27a , mir-27b                                                                                        | NKRF                 | mir-29c                            |  |  |
| CNOT6                   | mir-10a                                                                                                  | TNFAIP1              | mir-29c                            |  |  |
| ATP6V1A                 | mir-27a , mir-27b                                                                                        | MOBKL1A              | mir-29c                            |  |  |
| CCND1                   | let-7g , let-7f                                                                                          | FNDC3A ,<br>KIAA0970 | mir-208a                           |  |  |
| UTP18                   | mir-208a                                                                                                 | SGTB                 | mir-130b                           |  |  |
| PALM2                   | mir-181c , mir-27a ,<br>mir-409-3p , mir-27b<br>, mir-181b , mir-10a                                     | DLG2                 | mir-29c , mir-130b                 |  |  |
| RNF169                  | mir-181c , mir-181b                                                                                      | PRDX6                | mir-149                            |  |  |

|                        |                                                                      |                                   |                                        |  |  |
|------------------------|----------------------------------------------------------------------|-----------------------------------|----------------------------------------|--|--|
| NID2                   | let-7g , let-7f                                                      | ADAMTS6                           | mir-29c                                |  |  |
| TRIB1                  | let-7g , let-7f                                                      | CR618817 , SNTB2                  | mir-149 , mir-29c                      |  |  |
| TMSB10                 | mir-27a , mir-27b                                                    | RRPIB                             | mir-378                                |  |  |
| FAM160A2               | mir-181c , mir-181b                                                  | NDST1                             | mir-149 , mir-29c                      |  |  |
| SNAI1                  | mir-22 , mir-27a , mir-27b                                           | PCTK2                             | mir-149                                |  |  |
| EIF5A2                 | mir-27a , mir-27b                                                    | MAPRE1                            | mir-29c , mir-10a                      |  |  |
| MTMR12                 | let-7g , let-7f , mir-181c , mir-181b                                | PTPRD                             | mir-29c , mir-130b                     |  |  |
| ARID3A                 | let-7g , let-7f                                                      | NOTCH2 , N2 , NOTCH2NL            | mir-29c                                |  |  |
| PXDN                   | let-7g , let-7f                                                      | TGFBR2 , Tbeta RIIC               | mir-130b                               |  |  |
| CCDC6                  | mir-149 , mir-181c , mir-181b                                        | SNX18                             | mir-149                                |  |  |
| MAPK6                  | let-7g , let-7f                                                      | ROCK2                             | mir-130b                               |  |  |
| BC017787 , IPO7        | mir-22                                                               | hNp95 , UHRF1                     | mir-188-5p                             |  |  |
| PPP1R15B               | let-7g , mir-22 , let-7f                                             | COL4A4                            | mir-29c                                |  |  |
| ABL2                   | let-7g , let-7f , mir-181c , mir-27a , mir-27b , mir-181b            | ARIH2 , Ari2                      | mir-10a                                |  |  |
| RAN                    | mir-181c , mir-181b                                                  | AFF4                              | mir-29c                                |  |  |
| KIAA0308 , CHD9        | mir-22 , mir-208a , mir-181c , mir-376b , mir-181b                   | PURB                              | mir-208a , mir-149 , mir-378 , mir-10a |  |  |
| IGnT2 , GCNT2          | mir-181c , mir-181b , mir-421                                        | RAB5C                             | mir-208a                               |  |  |
| GMFB                   | mir-181c , mir-181b                                                  | MAP2K4                            | mir-188-5p , mir-29c                   |  |  |
| DPYSL3                 | let-7g , let-7f                                                      | CAST                              | mir-130b                               |  |  |
| CDCA4                  | mir-208a                                                             | EGR3                              | mir-130b                               |  |  |
| LRRC32                 | mir-181c , mir-181b                                                  | FBXW9                             | mir-29c                                |  |  |
| RGS16                  | let-7g , let-7f                                                      | CLCP1 , DCBLD2                    | mir-130b                               |  |  |
| WSB1                   | mir-181c , mir-27a , mir-27b , mir-181b                              | GRB10                             | mir-130b                               |  |  |
| MIB1                   | let-7g , let-7f                                                      | TNPO1                             | mir-130b                               |  |  |
| NUS1                   | mir-181c , mir-181b                                                  | SMRTE , NCOR2                     | mir-29c , mir-10a                      |  |  |
| AFF1                   | mir-181c , mir-181b                                                  | CCND3                             | mir-130b                               |  |  |
| PAK1                   | let-7g , let-7f                                                      | FREM2 , DKFZp686L06109            | mir-29c                                |  |  |
| UTP15                  | let-7g , let-7f                                                      | CNOT6L                            | mir-130b                               |  |  |
| COL4A2                 | let-7g , let-7f                                                      | EDN1                              | mir-130b                               |  |  |
| FAR1                   | mir-421                                                              | KIAA0928 , DKFZp434A0427 , DICER1 | mir-29c , mir-130b                     |  |  |
| BTG2                   | let-7g , let-7f , mir-27a , mir-27b , mir-421                        | FEM1C                             | mir-208a                               |  |  |
| MANBAL                 | mir-149                                                              | SLC38A1                           | mir-378                                |  |  |
| ITGA2                  | mir-27a , mir-27b                                                    | STX12                             | mir-130b                               |  |  |
| SMAP1                  | mir-10a                                                              | NUP50                             | mir-10a                                |  |  |
| RRP15                  | mir-149 , mir-421                                                    | CLTC                              | mir-149 , mir-130b                     |  |  |
| GATAD2A , DKFZp547D147 | mir-10a                                                              | ABCE1                             | mir-29c , mir-130b                     |  |  |
| TNFAIP1                | mir-181c , mir-181b                                                  | PIK3C2A                           | mir-130b                               |  |  |
| KIAA0669 , TSC22D2     | let-7g , let-7f , mir-181c , mir-27a , mir-27b , mir-181b            | RAB34                             | mir-130b                               |  |  |
| MOBK1A                 | mir-27a , mir-27b                                                    | MET                               | mir-130b                               |  |  |
| GOSR2                  | mir-409-3p                                                           | ABI1                              | mir-208a                               |  |  |
| SIMPLE , LITAF         | mir-27a , mir-27b                                                    | MAP3K3                            | mir-188-5p                             |  |  |
| GFOD1                  | mir-27a , mir-27b                                                    | COL5A2                            | mir-323-5p , mir-29c                   |  |  |
| FNDC3A , KIAA0970      | let-7g , mir-208a , let-7f , mir-181c , mir-27a , mir-27b , mir-181b | WIPF1                             | mir-149                                |  |  |
| TCERG1                 | mir-181c , mir-181b                                                  | ERBB2IP                           | mir-130b                               |  |  |
| SGTB                   | mir-181c , mir-181b                                                  | PTGIS                             | mir-149                                |  |  |
| ADAT2                  | mir-22                                                               | ARC20 , ARPC4                     | mir-149                                |  |  |
| PGRMC1                 | let-7g , let-7f                                                      | FAM167A                           | mir-149 , mir-29c                      |  |  |
| PRDX6                  | mir-149                                                              | PTP4A1                            | mir-29c , mir-130b                     |  |  |
| ADAMTS6                | let-7g , let-7f , mir-                                               | USP6NL                            | mir-29c                                |  |  |

|                                      |                                                                               |                                  |                                                     |  |  |
|--------------------------------------|-------------------------------------------------------------------------------|----------------------------------|-----------------------------------------------------|--|--|
|                                      | 181c , mir-27a , mir-27b , mir-181b                                           |                                  |                                                     |  |  |
| MTMR2                                | mir-22                                                                        | LOC647099 , RPL23A               | mir-378                                             |  |  |
| RRP1B                                | let-7g , let-7f                                                               | BAK , BAK1                       | mir-29c                                             |  |  |
| NDST1                                | mir-149 , mir-376b                                                            | robo1 , ROBO1                    | mir-29c                                             |  |  |
| RBM47                                | mir-181c , mir-181b                                                           | ARRDC4                           | mir-29c                                             |  |  |
| PLK2                                 | mir-27a , mir-27b                                                             | AMMECR1L                         | mir-29c                                             |  |  |
| MASP1                                | let-7g , let-7f                                                               | DKFZp313C2412 , OBFC2A           | mir-130b                                            |  |  |
| MAPRE1                               | mir-10a                                                                       | ETV4                             | mir-29c                                             |  |  |
| PCTK2                                | mir-149                                                                       | MYST2                            | mir-149                                             |  |  |
| NOTCH2 , N2 , NOTCH2NL               | mir-181c , mir-181b                                                           | E2F3                             | mir-10a                                             |  |  |
| EVII                                 | mir-22                                                                        | TRPC6                            | mir-29c                                             |  |  |
| FKBP12-Exip2 , FKBP1A , FKBP12-Exip3 | mir-181c , mir-181b                                                           | PTX3                             | mir-29c                                             |  |  |
| SNX18                                | mir-22 , mir-149 , mir-27a , mir-27b                                          | PRPF40A , HYPA                   | mir-29c                                             |  |  |
| hNp95 , UHRF1                        | let-7g , let-7f                                                               | OXSRI , OSR1                     | mir-149                                             |  |  |
| ARIH2 , Ari2                         | mir-10a                                                                       | DKFZp586D0624 , LDLRAP1          | mir-29c                                             |  |  |
| AFF4                                 | mir-27a , mir-27b , mir-421                                                   | FMNL3                            | mir-130b                                            |  |  |
| PURB                                 | mir-22 , mir-181c , mir-10a , let-7g , let-7f , mir-149 , mir-208a , mir-181b | COL4A3                           | mir-208a , mir-29c                                  |  |  |
| MAP2K4                               | mir-22 , mir-27a , mir-409-3p , mir-27b                                       | MARCKSL1                         | mir-149                                             |  |  |
| RAB5C                                | mir-208a                                                                      | LAMA2                            | mir-29c                                             |  |  |
| AMOTL1                               | mir-27a , mir-27b                                                             | STEERIN2 , KIAA1419 , NAV2       | mir-208a , mir-149 , mir-29c , mir-130b             |  |  |
| HBEGF                                | mir-27a , mir-27b                                                             | FSTL1                            | mir-29c                                             |  |  |
| KLHL6                                | let-7g , let-7f                                                               | SPIRE1                           | mir-130b                                            |  |  |
| EGR3                                 | let-7g , let-7f , mir-181c , mir-27a , mir-409-3p , mir-27b , mir-181b        | MAPK1IP1L                        | mir-378                                             |  |  |
| KIAA1416 , CHD7                      | mir-22 , mir-181c , mir-27a , mir-421 , let-7g , let-7f , mir-27b , mir-181b  | SNX24                            | mir-29c                                             |  |  |
| PLAU                                 | mir-181c , mir-181b                                                           | DKFZp434L1215 , UXS1             | mir-130b                                            |  |  |
| CLCP1 , DCBLD2                       | mir-181c , mir-181b                                                           | KIAA1174 , LMBR1L                | mir-149                                             |  |  |
| SMRTE , NCOR2                        | mir-10a                                                                       | HMG3                             | mir-29c                                             |  |  |
| AKIRIN1                              | mir-27a , mir-27b                                                             | NRP2                             | mir-149                                             |  |  |
| ATP8B1                               | mir-181c , mir-181b                                                           | SPARC                            | mir-29c                                             |  |  |
| FURIN                                | mir-22                                                                        | SGK1                             | mir-29c                                             |  |  |
| EDN1                                 | let-7g , let-7f                                                               | GLT8D3                           | mir-208a                                            |  |  |
| OSBPL10                              | mir-27a , mir-27b                                                             | LUZP1                            | mir-29c                                             |  |  |
| SRGAP3 , KIAA0411                    | let-7g , let-7f , mir-376b , mir-27a , mir-27b                                | CAMSAP1L1                        | mir-130b                                            |  |  |
| KIAA0928 , DKFZp434A0427 , DICER1    | let-7g , let-7f                                                               | CLCN5                            | mir-149 , mir-323-5p , mir-29c , mir-130b , mir-10a |  |  |
| FEM1C                                | mir-208a                                                                      | XPNPEP1                          | mir-29c                                             |  |  |
| SRI                                  | mir-409-3p , mir-421                                                          | FLJ00147 , USP47                 | mir-188-5p , mir-130b                               |  |  |
| PTPRE                                | mir-181c , mir-181b                                                           | PRKAA1                           | mir-130b                                            |  |  |
| SLC38A1                              | mir-409-3p                                                                    | DKFZp434I0916 , SULF1 , KIAA1077 | mir-378 , mir-130b                                  |  |  |
| NUP50                                | mir-10a                                                                       | MFAP2                            | mir-29c                                             |  |  |
| CLTC                                 | mir-149                                                                       | CCND2                            | mir-29c                                             |  |  |
| ACTN4                                | mir-876-3p                                                                    | CAV2                             | mir-29c , mir-130b                                  |  |  |
| CXCL3                                | mir-409-3p                                                                    | PMP22                            | mir-29c                                             |  |  |
| DDIT4                                | mir-22 , mir-181c ,                                                           | WHSC1                            | mir-188-5p                                          |  |  |

|                                        |                                                                     |                                      |                                 |  |
|----------------------------------------|---------------------------------------------------------------------|--------------------------------------|---------------------------------|--|
|                                        | mir-181b                                                            |                                      |                                 |  |
| CAPZA1                                 | mir-421                                                             | CD72                                 | mir-149                         |  |
| BCR variant protein ,<br>BCR-ABL , BCR | mir-10a                                                             | SEL-OB , SVEP1                       | mir-29c                         |  |
| SLC2A3                                 | mir-181c , mir-181b                                                 | IGSF1                                | mir-10a                         |  |
| LIN7C                                  | mir-22 , mir-181c ,<br>mir-27a , mir-409-3p ,<br>mir-27b , mir-181b | KIT                                  | mir-130b                        |  |
| PPAP2B                                 | mir-181c , mir-27a ,<br>mir-409-3p , mir-27b<br>, mir-181b          | GAB2                                 | mir-149 , mir-29c               |  |
| PII5                                   | mir-376b                                                            | EML4                                 | mir-208a , mir-29c              |  |
| GFPT2                                  | mir-27a , mir-27b                                                   | PHF20 , HCA58 ,<br>AX746620          | mir-130b                        |  |
| TOMM20                                 | mir-421                                                             | DGCR8                                | mir-149                         |  |
| CHD1                                   | mir-181c , mir-181b                                                 | ZDHHC9                               | mir-378                         |  |
| PAR6B                                  | let-7g , let-7f , mir-<br>376b , mir-27a , mir-<br>27b              | MYO1D                                | mir-130b                        |  |
| MET                                    | mir-27a , mir-27b                                                   | PPIA                                 | mir-323-5p                      |  |
| ABI1                                   | mir-208a , mir-181c ,<br>mir-181b                                   | FEM1B                                | mir-29c                         |  |
| SCYL3                                  | let-7g , let-7f                                                     | TORC2 , CRTC2                        | mir-149                         |  |
| RARA                                   | mir-27a , mir-27b                                                   | SMOC1                                | mir-130b                        |  |
| WIPF1                                  | mir-149                                                             | ACBD3                                | mir-130b                        |  |
| ATP8B2                                 | mir-181c , mir-181b                                                 | MEX3D                                | mir-130b                        |  |
| ZC3H12A                                | mir-421                                                             | NR2C2                                | mir-10a                         |  |
| PTGIS                                  | mir-149                                                             | CHSY1                                | mir-29c                         |  |
| Rabex5 , RABGEF1                       | mir-181c , mir-181b                                                 | EHD2                                 | mir-29c                         |  |
| ARC20 , ARPC4                          | mir-149                                                             | ape , CCDC88A ,<br>KIAA1212          | mir-29c                         |  |
| FAM167A                                | mir-149                                                             | ELOVL6                               | mir-188-5p                      |  |
| AMOT                                   | mir-22                                                              | EPS15                                | mir-29c , mir-130b              |  |
| IKBKE , IKK-i                          | let-7g , let-7f                                                     | SHROOM2                              | mir-149 , mir-29c               |  |
| CCNYL1                                 | mir-27a , mir-27b                                                   | TSPAN4                               | mir-29c                         |  |
| SEMA7A                                 | mir-27a , mir-27b                                                   | TMEM183B ,<br>TMEM183A ,<br>CR591805 | mir-29c , mir-10a               |  |
| USP6NL                                 | mir-181c , mir-181b                                                 | VCL                                  | mir-29c                         |  |
| BAK , BAK1                             | mir-27a , mir-409-3p ,<br>mir-27b                                   | ROD1                                 | mir-29c                         |  |
| RNMT                                   | mir-181c , mir-181b                                                 | SMG1 , KIAA0421                      | mir-188-5p                      |  |
| AHNAK                                  | mir-181c , mir-181b                                                 | GLIS3 , OK/KNS-cl.4                  | mir-29c                         |  |
| SCN5A , Nav1.5                         | let-7g , let-7f                                                     | SH3D19                               | mir-130b                        |  |
| SEMA6D                                 | mir-27a , mir-27b                                                   | MIP2 , WDR26                         | mir-29c                         |  |
| SRGAP1                                 | mir-181c , mir-181b                                                 | TRIB2                                | mir-29c                         |  |
| RAPGEF1                                | mir-22                                                              | SPTY2D1                              | mir-29c , mir-130b ,<br>mir-10a |  |
| ERO1-L , ERO1L                         | let-7g , let-7f                                                     | TOMM70A                              | mir-188-5p                      |  |
| ARRDC4                                 | let-7g , let-7f , mir-<br>27a , mir-27b                             | TBL1XR1 , TBLR1                      | mir-378 , mir-130b              |  |
| GALE                                   | let-7g , let-7f                                                     | FLRT2                                | mir-10a                         |  |
| BCAT1                                  | let-7g , let-7f                                                     | MIER1                                | mir-130b                        |  |
| GRK6                                   | mir-27a , mir-27b                                                   | VPS37B                               | mir-130b                        |  |
| DKFZp313C2412 ,<br>OBFC2A              | mir-376b , mir-27a ,<br>mir-27b                                     | GLT8D4                               | mir-29c                         |  |
| STK40 , FLJ00113                       | let-7g , let-7f , mir-<br>27a , mir-27b                             | EYA4                                 | mir-208a                        |  |
| MYST2                                  | mir-149                                                             | CALM2                                | mir-130b                        |  |
| E2F3                                   | mir-10a                                                             | ARFIP1                               | mir-130b                        |  |
| ENTPD1 , PleA 1                        | mir-421                                                             | CDK6                                 | mir-149 , mir-29c ,<br>mir-10a  |  |
| CLIC4                                  | mir-22                                                              | TULP4                                | mir-323-5p                      |  |
| OXSRI , OSR1                           | mir-149                                                             | LOXL2                                | mir-29c                         |  |
| TNFRSF1B                               | let-7g , mir-22 , let-7f                                            | CRK                                  | mir-10a                         |  |
| FBLN2                                  | mir-27a , mir-27b                                                   | PAN3                                 | mir-130b                        |  |
| CDKN1A                                 | let-7g , mir-22 , let-7f                                            | STRN4                                | mir-29c                         |  |
| CPNE2                                  | mir-181c , mir-181b                                                 | YRDC                                 | mir-29c                         |  |
| ITGB3                                  | let-7g , mir-149 , let-<br>7f                                       | LOXL4                                | mir-29c                         |  |

|                            |                                                                  |                                |                                 |  |  |
|----------------------------|------------------------------------------------------------------|--------------------------------|---------------------------------|--|--|
| DKFZp666C036 , ENO1        | mir-22                                                           | MEST                           | mir-29c                         |  |  |
|                            | let-7g , let-7f , mir-181c , mir-181b                            | SPTLC2                         | mir-149 , mir-29c               |  |  |
| MARCKSL1                   | mir-149                                                          | CPEB1                          | mir-130b                        |  |  |
| UBE2V1                     | mir-27a , mir-27b                                                | RPS6KA3                        | mir-188-5p , mir-29c , mir-130b |  |  |
| BSN                        | let-7g , let-7f                                                  | ANKIB1 , KIAA1386              | mir-130b                        |  |  |
| STEERIN2 , KIAA1419 , NAV2 | mir-208a , mir-149 , mir-27a , mir-409-3p , mir-27b              | KIAA0687 , MAP4K4              | mir-29c , mir-130b , mir-10a    |  |  |
| SMAD7                      | mir-181c , mir-181b                                              | ADAMTS9                        | mir-29c                         |  |  |
| SPIRE1                     | let-7g , let-7f , mir-181c , mir-181b                            | GNA13                          | mir-29c                         |  |  |
| NUMBL                      | let-7g , let-7f                                                  | CREB5                          | mir-29c , mir-130b              |  |  |
| GAN                        | let-7g , let-7f                                                  | RCC2                           | mir-378 , mir-29c               |  |  |
| ABHD2                      | mir-27a , mir-27b                                                | PDPK1 , PDK1                   | mir-323-5p                      |  |  |
| MAP4K3                     | let-7g , let-7f                                                  | TNFAIP3                        | mir-29c                         |  |  |
| MAPK11P1L                  | let-7g , let-7f , mir-181c , mir-181b                            | BTG1 , BC009050                | mir-130b                        |  |  |
| NMT2                       | mir-181c , mir-181b                                              | TATDN2                         | mir-29c                         |  |  |
| KIAA0449 , KIF21B          | let-7g , let-7f , mir-27a , mir-27b                              | EXT1                           | mir-149                         |  |  |
| ANKRD13 , ANKRD13A         | mir-22                                                           | EMP1                           | mir-188-5p , mir-29c            |  |  |
| PPME1                      | mir-27a , mir-27b                                                | LOC645895 , MYBL1              | mir-130b                        |  |  |
| SHE , FLJ00138             | mir-181c , mir-27a , mir-27b , mir-181b                          | TNFRSF1A                       | mir-29c                         |  |  |
| RNF125                     | mir-181c , mir-181b                                              | BMF                            | mir-29c                         |  |  |
| KIAA1174 , LMBR1L          | mir-149                                                          | RACGAP1                        | mir-130b                        |  |  |
| MBOAT2                     | mir-181c , mir-181b                                              | LTBR                           | mir-29c                         |  |  |
| EIF2C2                     | mir-27a , mir-27b                                                | TCF4                           | mir-130b                        |  |  |
| CDC42SE1                   | let-7g , let-7f                                                  | LAMC1                          | mir-29c , mir-130b              |  |  |
| PKN2                       | let-7g , let-7f , mir-181c , mir-27a , mir-27b , mir-181b        | LTBP2                          | mir-323-5p                      |  |  |
| FERMT2                     | mir-376b                                                         | DGKD , dgkd-2                  | mir-29c                         |  |  |
| ITGA5                      | mir-27a , mir-27b                                                |                                | mir-149                         |  |  |
| HNRNPK , HNRPK             | mir-409-3p                                                       | HIATL1                         | mir-29c                         |  |  |
| SH3BGRL2                   | mir-27a , mir-27b                                                | FAM46B                         | mir-130b                        |  |  |
| PDCD6IP                    | mir-181c , mir-181b                                              | SLC7A6                         | mir-29c                         |  |  |
| GLT8D3                     | let-7g , mir-208a , let-7f , mir-27a , mir-27b                   | IPPK                           | mir-323-5p                      |  |  |
| LDLR                       | mir-27a , mir-27b                                                | FUBP3                          | mir-188-5p                      |  |  |
| MAN2A1                     | mir-27a , mir-27b                                                | PPM1F                          | mir-149                         |  |  |
| CLCF1                      | mir-149                                                          | AK095546 , TPM4                | mir-10a                         |  |  |
| CAMSAP1L1                  | mir-181c , mir-181b                                              | CCT3                           | mir-149                         |  |  |
| LDB2                       | mir-421                                                          | ELMO2                          | mir-149 , mir-29c               |  |  |
| CLCN5                      | let-7g , mir-22 , mir-149 , let-7f , mir-27a , mir-27b , mir-10a | RNF39                          | mir-29c                         |  |  |
| FLJ00147 , USP47           | let-7g , let-7f , mir-181c , mir-181b                            | GNAI3                          | mir-323-5p                      |  |  |
| LIMD1                      | let-7g , let-7f                                                  | COL15A1                        | mir-29c                         |  |  |
| DLGAP4 , KIAA0964          | let-7g , let-7f                                                  | ITGB1                          | mir-29c                         |  |  |
| SEC23B                     | mir-22                                                           | SERPINE1 , BX649164 , BC005927 | mir-10a                         |  |  |
| RPN1                       | mir-27a , mir-27b                                                | FRMD4A , KIAA1294              | mir-29c                         |  |  |
| SLC7A11                    | mir-181c , mir-376b , mir-27a , mir-27b , mir-181b               | PPIC                           | mir-29c                         |  |  |
| ARPC5                      | mir-22                                                           | SC4MOL                         | mir-130b                        |  |  |
| CCND2                      | let-7g , let-7f                                                  | TTYH2                          | mir-29c                         |  |  |
| MTHFR                      | mir-22                                                           | EXOC5                          | mir-149 , mir-130b              |  |  |
| CALM1                      | let-7g , let-7f , mir-181c , mir-409-3p ,                        | DGKH , DGKH-1                  | mir-29c                         |  |  |

|                                |                                                                      |                        |                         |  |
|--------------------------------|----------------------------------------------------------------------|------------------------|-------------------------|--|
|                                | mir-181b                                                             |                        |                         |  |
| WHSC1                          | mir-181c , mir-181b                                                  | RIOK3                  | mir-29c                 |  |
| DKFZp761G1923 , PI4K2A         | mir-181c , mir-181b                                                  | ATP7A                  | mir-29c                 |  |
| MTHFD2                         | mir-22                                                               | NBEA , KIAA1544        | mir-188-5p              |  |
| CDH5                           | mir-27a , mir-27b                                                    | MARCKS                 | mir-188-5p , mir-323-5p |  |
| SPRED1                         | mir-409-3p                                                           | GRIA3                  | mir-149                 |  |
| BZW1                           | let-7g , let-7f                                                      | CR607999 , TROVE2      | mir-130b                |  |
| DKFZp434A109 , SLC39A13        | mir-27a , mir-27b                                                    | SRC                    | mir-149                 |  |
| BCL2L1                         | let-7g , let-7f                                                      | FLJ00213 , TBRG1       | mir-188-5p              |  |
| RALB                           | let-7g , let-7f                                                      | ARSB                   | mir-29c                 |  |
| LPIN2                          | mir-27a , mir-27b                                                    | FBXW11                 | mir-130b                |  |
| ARF3                           | mir-181c , mir-27a , mir-27b , mir-181b                              | TMEM184B               | mir-149 , mir-323-5p    |  |
| GAB2                           | let-7g , mir-149 , let-7f                                            | DPYSL2                 | mir-29c , mir-130b      |  |
| ALG9                           | mir-22 , mir-27a , mir-27b                                           | SLC10A7 , DKFZp566M114 | mir-208a                |  |
| OAF                            | mir-27a , mir-27b                                                    | SLC39A10               | mir-130b                |  |
| RSU1                           | mir-22                                                               | LAMA4                  | mir-188-5p              |  |
| EML4                           | mir-208a                                                             | PTGFRN                 | mir-130b                |  |
| YWHAG                          | mir-181c , mir-181b                                                  | SHB                    | mir-149                 |  |
| PHF20 , HCA58 , AX746620       | mir-409-3p                                                           | RHBDD1                 | mir-29c                 |  |
| DGCR8                          | mir-149                                                              | FAM107B                | mir-130b                |  |
| PRKY                           | mir-27a , mir-27b                                                    | SLC6A6                 | mir-130b                |  |
| B4GALT5                        | mir-22                                                               | PITPNA                 | mir-29c                 |  |
| PPIA                           | mir-876-3p                                                           | UBTD2                  | mir-149 , mir-29c       |  |
| TBC1D9                         | mir-181c , mir-181b                                                  | KIAA0379 , ANKRD28     | mir-130b                |  |
| POLS                           | mir-27a , mir-27b                                                    | WWC2 , BOMB            | mir-10a                 |  |
| TORC2 , CRTC2                  | mir-149                                                              | TSPAN14                | mir-29c                 |  |
| LARP1                          | mir-409-3p                                                           | PTBLP , PTBP2          | mir-208a                |  |
| GDAP2                          | let-7g , let-7f                                                      | MLXIP                  | mir-29c                 |  |
| SESN2                          | mir-27a , mir-27b                                                    | KIF3B                  | mir-29c                 |  |
| KIAA1412 , TMEM2               | let-7g , let-7f                                                      | CLIC5                  | mir-188-5p              |  |
| RASSF5                         | mir-27a , mir-27b                                                    | SLC25A1                | mir-323-5p , mir-10a    |  |
| PTMA                           | mir-376b                                                             | ADAMTS17               | mir-29c                 |  |
| CHKA                           | mir-27a , mir-27b                                                    | FRZB                   | mir-130b                |  |
| CSNK1G3                        | mir-181c , mir-181b                                                  |                        |                         |  |
| SHROOM2                        | mir-149 , mir-27a , mir-27b                                          |                        |                         |  |
| DLL4                           | mir-27a , mir-409-3p , mir-27b                                       |                        |                         |  |
| TMEM183B , TMEM183A , CR591805 | mir-10a                                                              |                        |                         |  |
| MXD1                           | let-7g , mir-22 , let-7f                                             |                        |                         |  |
| ECE1                           | mir-27a , mir-27b                                                    |                        |                         |  |
| SH3BGRL3                       | mir-409-3p                                                           |                        |                         |  |
| ROD1                           | mir-181c , mir-181b                                                  |                        |                         |  |
| GLIS3 , OK/KNS-cl.4            | mir-181c , mir-181b                                                  |                        |                         |  |
| RASSF1                         | mir-181c , mir-181b                                                  |                        |                         |  |
| p62 , IGF2BP2                  | let-7g , let-7f , mir-181c , mir-181b                                |                        |                         |  |
| UBXD2 , UBXN4                  | let-7g , let-7f                                                      |                        |                         |  |
| INHBB                          | mir-10a                                                              |                        |                         |  |
| PRKCD                          | mir-181c , mir-27a , mir-27b , mir-181b                              |                        |                         |  |
| PKNOX1                         | mir-181c , mir-181b                                                  |                        |                         |  |
| SPTY2D1                        | mir-22 , mir-181c , mir-27a , mir-27b , mir-181b , mir-10a , mir-421 |                        |                         |  |
| TOMM70A                        | mir-421                                                              |                        |                         |  |
| TBL1XR1 , TBLR1                | mir-181c , mir-376b , mir-181b                                       |                        |                         |  |
| CALM2                          | mir-421                                                              |                        |                         |  |



|                          |                                                                     |  |  |  |  |
|--------------------------|---------------------------------------------------------------------|--|--|--|--|
| NEK6                     | mir-27a , mir-27b                                                   |  |  |  |  |
| PIK3CD                   | mir-27a , mir-27b                                                   |  |  |  |  |
| CDK6                     | mir-149 , mir-27a ,<br>mir-27b , mir-10a ,<br>mir-421               |  |  |  |  |
| TULP4                    | mir-181c , mir-876-3p<br>, mir-181b                                 |  |  |  |  |
| PGF                      | mir-149                                                             |  |  |  |  |
| CRK                      | mir-10a                                                             |  |  |  |  |
| LIMK1                    | mir-27a , mir-27b                                                   |  |  |  |  |
| SLC39A11                 | mir-27a , mir-27b                                                   |  |  |  |  |
| LOXL4                    | let-7g , let-7f                                                     |  |  |  |  |
| NCAM1                    | mir-27a , mir-27b ,<br>mir-421                                      |  |  |  |  |
| PDPN                     | mir-27a , mir-27b                                                   |  |  |  |  |
| SLC25A25                 | mir-181c , mir-27a ,<br>mir-27b , mir-181b                          |  |  |  |  |
| MEST                     | mir-181c , mir-181b                                                 |  |  |  |  |
| CPEB1                    | let-7g , mir-22 , let-7f                                            |  |  |  |  |
| OSMR                     | let-7g , let-7f                                                     |  |  |  |  |
| RPS6KA3                  | let-7g , let-7f , mir-<br>181c , mir-409-3p ,<br>mir-181b , mir-421 |  |  |  |  |
| PDK4                     | mir-27a , mir-27b                                                   |  |  |  |  |
| ANKIB1 , KIAA1386        | mir-27a , mir-876-3p ,<br>mir-27b                                   |  |  |  |  |
| TNFSF9                   | let-7g , let-7f                                                     |  |  |  |  |
| CCL3                     | let-7g , let-7f                                                     |  |  |  |  |
| SHOC2                    | mir-181c , mir-181b                                                 |  |  |  |  |
| KIAA0687 ,<br>MAP4K4     | let-7g , let-7f , mir-<br>181c , mir-181b , mir-<br>10a             |  |  |  |  |
| FGFR1 , MST123           | mir-376b                                                            |  |  |  |  |
| IRS2                     | let-7g , let-7f , mir-<br>181c , mir-181b                           |  |  |  |  |
| RBMS1                    | mir-376b                                                            |  |  |  |  |
| GNA13                    | mir-27a , mir-27b                                                   |  |  |  |  |
| FARP1                    | let-7g , let-7f                                                     |  |  |  |  |
| CREB5                    | mir-876-3p                                                          |  |  |  |  |
| POM121                   | mir-181c , mir-27a ,<br>mir-27b , mir-181b                          |  |  |  |  |
| TMED5 , UNQ397           | let-7g , let-7f , mir-<br>27a , mir-27b                             |  |  |  |  |
| RCC2                     | mir-22                                                              |  |  |  |  |
| OK/SW-cl.14 ,<br>CALD1   | mir-27a , mir-27b                                                   |  |  |  |  |
| DKFZp434H0127 ,<br>PRDM4 | mir-181c , mir-181b                                                 |  |  |  |  |
| MAPK11                   | let-7g , let-7f                                                     |  |  |  |  |
| PDPK1 , PDK1             | mir-181c , mir-27a ,<br>mir-27b , mir-181b                          |  |  |  |  |
| TNFAIP3                  | let-7g , let-7f                                                     |  |  |  |  |
| HYOU1                    | mir-181c , mir-27a ,<br>mir-27b , mir-181b                          |  |  |  |  |
| BTG1 , BC009050          | mir-22 , mir-27a ,<br>mir-876-3p , mir-27b                          |  |  |  |  |
| HMG A1                   | let-7g , let-7f                                                     |  |  |  |  |
| CUL4B                    | mir-876-3p , mir-421                                                |  |  |  |  |
| SDC-1 , SDC1             | mir-10a                                                             |  |  |  |  |
| KCTD10                   | let-7g , let-7f                                                     |  |  |  |  |
| ETV6                     | mir-181c , mir-876-3p<br>, mir-181b                                 |  |  |  |  |
| TXLNA                    | let-7g , let-7f                                                     |  |  |  |  |
| HN1L ,<br>DKFZp434O1216  | mir-409-3p                                                          |  |  |  |  |
| CBLB , Nbla00127         | mir-181c , mir-27a ,<br>mir-27b , mir-181b                          |  |  |  |  |
| TTC9                     | mir-22                                                              |  |  |  |  |
| BMF                      | mir-181c , mir-181b ,<br>mir-421                                    |  |  |  |  |

|                                            |                                                                         |  |  |  |  |
|--------------------------------------------|-------------------------------------------------------------------------|--|--|--|--|
| FNDC3B , fad104                            | let-7g , let-7f                                                         |  |  |  |  |
| RLF                                        | mir-181c , mir-181b                                                     |  |  |  |  |
| VASP                                       | mir-22                                                                  |  |  |  |  |
| IGF1R                                      | let-7g , let-7f , mir-376b                                              |  |  |  |  |
| DPP3                                       | let-7g , let-7f , mir-876-3p                                            |  |  |  |  |
| LTBP2                                      | mir-876-3p                                                              |  |  |  |  |
| XYLT1                                      | let-7g , let-7f , mir-181c , mir-181b                                   |  |  |  |  |
| SLC7A2                                     | mir-22                                                                  |  |  |  |  |
| SEC24A                                     | mir-27a , mir-27b                                                       |  |  |  |  |
| CWF19L1                                    | mir-409-3p                                                              |  |  |  |  |
| INTS2                                      | let-7g , let-7f                                                         |  |  |  |  |
| CDR2                                       | mir-376b , mir-27a , mir-27b                                            |  |  |  |  |
| IPPK                                       | mir-181c , mir-376b , mir-876-3p , mir-181b                             |  |  |  |  |
| SLC1A4                                     | let-7g , let-7f                                                         |  |  |  |  |
| KPNB1                                      | mir-181c , mir-27a , mir-27b , mir-181b                                 |  |  |  |  |
| PPM1F                                      | mir-149                                                                 |  |  |  |  |
| AK095546 , TPM4                            | mir-10a                                                                 |  |  |  |  |
| CCT3                                       | mir-149                                                                 |  |  |  |  |
| PRKAB2                                     | let-7g , let-7f                                                         |  |  |  |  |
| AK125701 , DDX19A , DDX19B , DKFZp762C1313 | let-7g , let-7f                                                         |  |  |  |  |
| GIPC1                                      | let-7g , let-7f , mir-27a , mir-27b                                     |  |  |  |  |
| ENAH                                       | mir-208a , mir-181c , mir-376b , mir-27a , mir-27b , mir-181b , mir-421 |  |  |  |  |
| FREQ                                       | mir-27a , mir-27b , mir-421                                             |  |  |  |  |
| ELMO2                                      | mir-149                                                                 |  |  |  |  |
| PRKX                                       | mir-27a , mir-27b                                                       |  |  |  |  |
| GNAI3                                      | mir-876-3p                                                              |  |  |  |  |
| CDC42BPB                                   | mir-27a , mir-27b                                                       |  |  |  |  |
| SERPINE1 , BX649164 , BC005927             | mir-181c , mir-181b , mir-10a                                           |  |  |  |  |
| ITGA3                                      | mir-181c , mir-181b                                                     |  |  |  |  |
| Y09859 , CYR61                             | mir-22                                                                  |  |  |  |  |
| PRELID1                                    | mir-22                                                                  |  |  |  |  |
| BIN3                                       | let-7g , let-7f                                                         |  |  |  |  |
| EXOC5                                      | mir-149 , mir-421                                                       |  |  |  |  |
| SERTAD2                                    | mir-181c , mir-27a , mir-27b , mir-181b                                 |  |  |  |  |
| ACLY                                       | mir-27a , mir-27b                                                       |  |  |  |  |
| RIOK3                                      | let-7g , let-7f                                                         |  |  |  |  |
| FGD6                                       | let-7g , let-7f , mir-27a , mir-27b                                     |  |  |  |  |
| FIP1L1/PDGFRA fusion , PDGFRA              | mir-149 , mir-181c , mir-27a , mir-27b , mir-181b , mir-421             |  |  |  |  |
| PLEK                                       | mir-181c , mir-181b                                                     |  |  |  |  |
| ATXN10                                     | mir-27a , mir-27b                                                       |  |  |  |  |
| ALKBH1                                     | let-7g , let-7f                                                         |  |  |  |  |
| CR607999 , TROVE2                          | mir-27a , mir-27b                                                       |  |  |  |  |
| PAK4                                       | mir-181c , mir-181b                                                     |  |  |  |  |
| SRC                                        | mir-149                                                                 |  |  |  |  |
| SPRY2                                      | mir-27a , mir-27b                                                       |  |  |  |  |
| AX747733 , CTTNBP2NL , DKFZp547A023        | mir-181c , mir-181b                                                     |  |  |  |  |
| CASP3                                      | let-7g , let-7f                                                         |  |  |  |  |
| TMEM184B                                   | mir-149                                                                 |  |  |  |  |

|                        |                                                    |  |  |  |  |
|------------------------|----------------------------------------------------|--|--|--|--|
| ADAMTS1                | let-7g , let-7f                                    |  |  |  |  |
| SLC10A7 , DKFZp566M114 | mir-208a , mir-181c , mir-27a , mir-27b , mir-181b |  |  |  |  |
| SHB                    | mir-149 , mir-27a , mir-27b                        |  |  |  |  |
| SIPA1L3                | mir-27a , mir-27b                                  |  |  |  |  |
| SLC6A6                 | mir-27a , mir-409-3p , mir-27b                     |  |  |  |  |
| SLC25A24               | let-7g , let-7f                                    |  |  |  |  |
| KIAA0379 , ANKRD28     | let-7g , let-7f                                    |  |  |  |  |
| SLC38A2                | mir-181c , mir-181b                                |  |  |  |  |
| WWC2 , BOMB            | mir-22 , mir-10a , mir-421                         |  |  |  |  |
| FNBP4 , KIAA1014       | mir-181c , mir-181b                                |  |  |  |  |
| PTBLP , PTBP2          | mir-208a , mir-181c , mir-181b                     |  |  |  |  |
| DUSP4                  | let-7g , let-7f                                    |  |  |  |  |
| ADM                    | mir-181c , mir-181b                                |  |  |  |  |
| IKZF1 , ZNFN1A1        | mir-27a , mir-27b                                  |  |  |  |  |
| KIF3B                  | mir-181c , mir-181b                                |  |  |  |  |
| SEMA4C                 | let-7g , let-7f , mir-181c , mir-181b              |  |  |  |  |
| SLC25A1                | mir-10a                                            |  |  |  |  |
| POM121C , POM121-2     | mir-181c , mir-27a , mir-27b , mir-181b            |  |  |  |  |
| KLHL2                  | mir-181c , mir-181b                                |  |  |  |  |
| YWHAB                  | mir-181c , mir-27a , mir-27b , mir-181b            |  |  |  |  |

39  
40  
41  
42  
43  
44  
45

Table S5: miRNAs predicted to target mRNAs in the cardiac hypertrophy and apoptosis pathways. Gene symbol for the predicted targets and corresponding miRNAs are described on the table.

#### Cardiac Hypertrophy Pathway

| 2 days down mRNA | 2 days up miR                                    | 2 weeks down mRNA | 2 weeks up miR                              | 2 months down mRNA | 2 months up miR |
|------------------|--------------------------------------------------|-------------------|---------------------------------------------|--------------------|-----------------|
| ADCY9            | 19b                                              | ADRA1B            | 93                                          | MAP2K6             | 29a// 29b// 29c |
| ADRA1B           | 20a// 93// 106a// 106b//17                       | ADRB1             | 199a-3p// 25// let-7i                       |                    |                 |
| ADRB1            | 19b// 92a                                        | MAP3K4            | 15a// 15b// 199a-3p// 16// 497// 195// 148a |                    |                 |
| EIF4E            | 15b                                              | MAP3K10           | 181a                                        |                    |                 |
| GNA12            | 15b                                              | RND2              | 221                                         |                    |                 |
| GNB5             | 20a// 93// 106a// 106b//17                       |                   |                                             |                    |                 |
| IRS1             | 15b                                              |                   |                                             |                    |                 |
| MAP3K4           | 15b                                              |                   |                                             |                    |                 |
| MAP3K5           | 582-3p// 20a// 106a// 106b// 93// 23a// 23b// 17 |                   |                                             |                    |                 |
| MEF2A            | 19b                                              |                   |                                             |                    |                 |
| MEF2C            | 223// 23a// 23b//105// 551b                      |                   |                                             |                    |                 |
| MRAS             | 423-5p                                           |                   |                                             |                    |                 |
| PLCB1            | 20a//93// 106a// 106b// 17                       |                   |                                             |                    |                 |
| RAF1             | 19b// 15b                                        |                   |                                             |                    |                 |
| RHOB             | 223// 19b// 21                                   |                   |                                             |                    |                 |
| RHOT1            | 142-5p                                           |                   |                                             |                    |                 |

| 2 days up mRNA | 2 days down miR                                                                            | 2 weeks up mRNA | 2 weeks down miR | 2 months up mRNA | 2 months down miR |
|----------------|--------------------------------------------------------------------------------------------|-----------------|------------------|------------------|-------------------|
| ADRB2          | let-7g // 30a // let-7f // let-7a // let-7c // let-7i // 30e                               | GNB4            | 29a // 29c       | PRKAR1A          | 150               |
| CACNA1D        | let-7g // let-7f // let-7a // let-7c // let-7i                                             | PRKAR1A         | 30a // 30e       | TGFB1            | 744               |
| CALM1          | 22 // 27a // 29c // 27b // 29b                                                             | TGFBR1          | 208a             |                  |                   |
| GNA13          | 30a // 27a // 29c // 27b // 30e // 29b                                                     |                 |                  |                  |                   |
| GNG12          | 27a // 29c // 27b // 29b                                                                   |                 |                  |                  |                   |
| IGF1R          | let-7g // 30a // let-7f // 133a // let-7a // let-7c // let-7i // 30e                       |                 |                  |                  |                   |
| MAP2K1         | 34a // 449b // 449a                                                                        |                 |                  |                  |                   |
| MAP2K4         | 22 // 27a // 409-3p // 29c // 27b // 29b                                                   |                 |                  |                  |                   |
| MAPK11         | let-7g // let-7f // let-7a // let-7c // let-7i                                             |                 |                  |                  |                   |
| NRAS           | let-7g // let-7f // let-7a // let-7c // let-7i                                             |                 |                  |                  |                   |
| PIK3C2A        | 133a                                                                                       |                 |                  |                  |                   |
| PIK3CD         | 30a // 27a // 27b // 30e                                                                   |                 |                  |                  |                   |
| RRAS           | 34a // 449b // 449a                                                                        |                 |                  |                  |                   |
| TGFBR1         | 22 // 27a // let-7c // let-7i // let-7g // 208a // let-7a // 133a // let-7f // 27b // 181b |                 |                  |                  |                   |

47  
48  
49  
50  
51

## Apoptosis

| 2 days up mRNA | 2 days down miR                                                                                           | 2 weeks up mRNA | 2 weeks down miR | 2 months up mRNA | 2 months down miR |
|----------------|-----------------------------------------------------------------------------------------------------------|-----------------|------------------|------------------|-------------------|
| APAF1          | 27a // 212 // 27b                                                                                         | BAK1            | 29a // 29c       | PRKCA            | 329 // 760        |
| BAK1           | 27a // 409-3p // 29c // 27b // 29b                                                                        | CASP7           | 29a // 29c       |                  |                   |
| BCL2L1         | let-7g // let-7f // 133a // let-7a // let-7c // let-7i                                                    |                 |                  |                  |                   |
| CASP3          | let-7g // 30a // let-7f // let-7a // let-7c // let-7i // 30e                                              |                 |                  |                  |                   |
| IKBKE          | let-7g // let-7f // let-7a // let-7c // let-7i                                                            |                 |                  |                  |                   |
| MAP2K1         | 34a // 449b // 449a                                                                                       |                 |                  |                  |                   |
| MAP2K4         | 22 // 27a // 409-3p // 29c // 27b // 29b                                                                  |                 |                  |                  |                   |
| MAP4K4         | 449b // 29c // let-7c // let-7i // 449a // let-7g // 34a // 30a // let-7f // let-7a // 30e // 29b // 181b |                 |                  |                  |                   |
| NRAS           | let-7g // let-7f // let-7a // let-7c // let-7i                                                            |                 |                  |                  |                   |
| RRAS           | 34a // 449b // 449a                                                                                       |                 |                  |                  |                   |
| TNFRSF1A       | 29c // 29b                                                                                                |                 |                  |                  |                   |
| TNFRSF1B       | 22 // let-7g // let-7f // let-7a // let-7c // let-7i                                                      |                 |                  |                  |                   |

52  
53  
54  
55
